# Supplementary material for: CARD-Associated Risk Score Features the Immune Landscape and Predicts the Responsiveness to Anti-PD-1 Therapy in IDH Wild-Type Gliomas
Source: Front Cell Dev Biol. 2021 Mar 19;9:653240. doi: 10.3389/fcell.2021.653240 (PMC8009185; doi:10.3389/fcell.2021.653240)
Supplement: Supplementary file 3 [file Data_Sheet_1.XLSX]

## Sheet: A
Geneset	Source
T-cell inflamed signature	Spranger et al 2015	CD8A	CCL2	CCL3	CCL4	CXCL9	CXCL10	ICOS	GZMK	IRF1	HLA-DMA	HLA-DMB	HLA-DOA	HLA-DOB
lymphocyte infiltration signature	Thorsson et al 2018	ESR1	CCL5	CD19	CD37	CD3D	CD3E	CD3G	CD3Z	CD79A	CD79B	CD8A	CD8B	IGHG3	JCHAIN	IGLC1	CD14	LCK	LTB	MS4A1
Cytotoxic activity (CYT)	Davoli et al 2017	PRF1	GZMK	GZMA	GZMB	GZMH
MHC class-I	Lauss et al 2017	HLA-A	HLA-B	HLA-C	TAP1	TAP2	PSMB8	PSMB9	NLRC5	B2M
Batf3-DC	Spranger et al 2017	BATF3	IRF8	THBD	CLEC9A

## Sheet: B
Cell type	Abbreviation	Source
Activated CD4 T cell	actCD4 T	Charoentong et al 2016	AIM2	BIRC3	BRIP1	CCL20	CCL4	CCL5	CCNB1	CCR7	DUSP2	ESCO2	ETS1	EXO1	EXOC6	IARS	ITK	KIF11	KNTC1	NUF2	PRC1	PSAT1	RGS1	RTKN2	SAMSN1	SELL	TRAT1
Activated CD8 T cell	actCD8 T	Charoentong et al 2016	ADRM1	AHSA1	C1GALT1C1	CCT6B	CD37	CD3D	CD3E	CD3G	CD69	CD8A	CETN3	CSE1L	GEMIN6	GNLY	GPT2	GZMA	GZMH	GZMK	IL2RB	LCK	MPZL1	NKG7	PIK3IP1	PTRH2	TIMM13	ZAP70
Central memory CD4 T cell	CD4 Tcm	Charoentong et al 2016	ABHD3	AHNAK	ANXA2P2	AQP3	ATHL1	BMI1	BZW2	CD63	COL4A1	CYLD	ELMO2	FYN	GLIPR1	GSS	IFITM2	ITGB1	ITGB2	KLF5	LSP1	NDUFB9	PKM2	SFXN3	SIRPG	SMAD4	STX4	TRADD	VIM	XRCC6
Central memory CD8 T cell	CD8 Tcm	Charoentong et al 2016	ACTN4	ADAM12	ADCY9	F13A1	FCER1G	FCGR3B	FGF7	FKBP4	GLUD1	GM2A	GUSB	IL1RN	NOL11	NTRK1	RARA	RNF128	SIGLEC1	TNFRSF11A	TOX4	UBA52	ULBP1
Effector memeory CD4 T cell	CD4 Tem	Charoentong et al 2016	ATM	CASP3	CASQ1	CD300E	DARS	DOCK9	EXOSC9	EZH2	GDE1	IL34	NCOA4	NEFL	PDGFRL	PTGS1	REPS1	SCG2	SDPR	SIGLEC14	SIGLEC6	TAL1	TFEC	TIPIN	TPK1	UQCRB	USP9Y	WIPF1	ZCRB1
Effector memeory CD8 T cell	CD8 Tem	Charoentong et al 2016	ACAP1	APOL3	ARHGAP10	ATP10D	C3AR1	CCR5	CD160	CD55	CFLAR	CMKLR1	DAPP1	FCRL6	FLT3LG	GZMM	HAPLN3	HLA-DMB	HLA-DPA1	HLA-DPB1	IFI16	LIME1	LTK	NFKBIA	SETD7	SIK1	TRIB2
Activated DC	aDC	Charoentong et al 2016	ABCD1	C1QC	CAPG	CCL3L3	CD207	CD302	ATP5B	ATP5L	ATP6V1A	BCL2L1	C1QB	SNURF	SPCS3	CCNA1	CEACAM8	NOS2	SRA1	TNFRSF6B	TREM1	TREML1	RHOA	SLC25A37	TNFSF14	TREML4	VNN2	XPO6	CLEC4C	TNFAIP2	UBD	ACTR3	RAB1A	SLA	HLA-DQA2	SIGLEC5	SLAMF9
NK CD56bright cells	Nkbrigh	Charoentong et al 2016	ABAT	C11orf75	C5orf15	CDHR1	DCAF12	DYNLL1	GPR137B	HCP5	HDGFRP2	KRT86	MLST8	ELMOD3	ENTPD5	FAM119A	FAM179A	CLIC2	COX7A2L	CREB3L4	CSF1	CSNK2A2	CSTA	CSTB	CTPS	CTSD	FST	GATA2	GMPR	HDC	HEY1	HOXA1	HS2ST1	HS3ST1	BCL11B	CDH3	MYL6B	NAA16	ClQA	ClQB	CYP27B1	EIF3M
Regulatory T cell	Treg	Charoentong et al 2016	CCL3L1	CD72	CLEC5A	FOXP3	ITGA4	L1CAM	LIPA	LRP1	LRRC42	MARCO	MMP12	MNDA	MRC1	MS4A6A	PELO	PLEK	PRSS23	PTGIR	ST8SIA4	STAB1
NK CD56dim cells	Nkdim	Charoentong et al 2016	CYP27A1	DDX55	DYRK2	RPL37A	NOTCH3	AKR7A3	GPRC5C	GRIN1	HLA-E	PORCN	PSMC4	UPP1	IL21R	KIR2DS1	KIR2DS2	KIR2DS5
immature DC	iDC	Charoentong et al 2016	ACADM	AHCYL1	ALDH1A2	ALDH3A2	ALDH9A1	ALOX15	AMT	ARL1	ATIC	ATP5A1	CAPZA1	LILRA5	RDX	RRAGD	TACSTD2	INPP5F	RAB38	PLAU	CSF3R	SLC18A2	AMPD2	CLTB	C1orf162
Macrophages	Macrophages	Charoentong et al 2016	AIF1	CCL1	CCL14	CCL23	CCL26	CD300LB	CNR1	CNR2	EIF1	EIF4A1	FPR1	FPR2	FRAT2	GPR27	GPR77	RNASE2	MS4A2	BASP1	IGSF6	HK3	VNN1	FES	NPL	FZD2	FAM198B	HNMT	SLC15A3	CD4	TXNDC3	FRMD4A	CRYBB1	HRH1	WNT5B
MDSC	MDSC	Charoentong et al 2016	CCR2	CD14	CD2	CD86	CXCR4	FCGR2A	FCGR2B	FCGR3A	FERMT3	GPSM3	IL18BP	IL4R	ITGAL	ITGAM	PARVG	PSAP	PTGER2	PTGES2	S100A8	S100A9
Neutrophils	Neutrophils	Charoentong et al 2016	CREB5	CDA	CHST15	S100A12	APOBEC3A	CASP5	MMP25	HAL	C1orf183	FFAR2	MAK	CXCR1	STEAP4	MGAM	BTNL8	CXCR2	TNFRSF10C	VNN3
Activated B cell	act B	Charoentong et al 2016	ADAM28	CD180	CD79B	BLK	CD19	MS4A1	TNFRSF17	IGHM	GNG7	MICAL3	SPIB	HLA-DOB	IGKC	PNOC	FCRL2	BACH2	CR2	TCL1A	AKNA	ARHGAP25	CCL21	CD27	CD38	CLEC17A	CLEC9A	CLECL1
Memory B cell	memory B	Charoentong et al 2016	AICDA	CCNA2	CDKN3	CLCN5	ENPP1	FCER1A	FCRL4	MYC	RUNX2	SORL1	SOX5	STAT5A	STAT5B	TLR9
Gamma delta T cell	Tgd	Charoentong et al 2016	ACP5	AQP9	BTN3A2	C1orf54	CARD8	CCL18	CD209	CD33	CD36	CDK5	IL10RB	KLRF1	LGALS1	MAPK7	KLHL7	KRT80	LAMC1	LCORL	LMNB1	MEIS3P1	MPL	FABP1	FABP5	FADD	MFAP3L	MINPP1	RPS24	RPS7	RPS9	DBNL	CCL13
T follicular helper cell	Tfh	Charoentong et al 2016	B3GAT1	CDK5R1	PDCD1	BCL6	CD200	CD83	CD84	FGF2	GPR18	CEBPA	CECR1	CLEC10A	CLEC4A	CSF1R	CTSS	DMN	DPP4	LRRC32	MC5R	MICA	NCAM1	NCR2	NRP1	PDCD1LG2	PDCD6	PRDX1	RAE1	RAET1E	SIGLEC7	SIGLEC9	TYRO3	CHST12	CLIC3	IVNS1ABP	KIR2DL2	LGMN
Eosinophils	Eosinophils	Charoentong et al 2016	GIPR	KRT18P50	LRMP	FOSB	RRP12	GPR183	NR4A3	ST3GAL6	DEPDC5	PDE6C	PKD2L2	GPR65	IL5RA	P2RY14	DACH1	DAPK2	EMR3
Mast cells	Mast	Charoentong et al 2016	ADAMTS3	CPA3	CMA1	CTSG	ARHGAP15	CPM	FCN1	FTL	HSPA6	ITGA9	RNASE3	S100A4	SIGLEC8	SLC6A4	PTGS2	EGR3	PILRA
