# Supplementary material for: CARD-Associated Risk Score Features the Immune Landscape and Predicts the Responsiveness to Anti-PD-1 Therapy in IDH Wild-Type Gliomas
Source: Front Cell Dev Biol. 2021 Mar 19;9:653240. doi: 10.3389/fcell.2021.653240 (PMC8009185; doi:10.3389/fcell.2021.653240)
Supplement: Supplementary file 4 [file Data_Sheet_2.XLSX]

## Sheet: S3
Table S3 Differential gene expression and Immport database annotation.
Symbol	logFC	logCPM	F	PValue	Immport category 1	Immport category 2	Immport category 3
CCL18	5.56952	2.92368	71.4304	3.17753e-15	Antimicrobials	Chemokines	Cytokines
SAA2	4.23053	3.07136	64.5229	4.77626e-14	Chemokines	Cytokines
CXCL13	4.0903	1.69094	61.2682	1.75305e-13	Antimicrobials	Chemokines	Cytokines
SAA1	3.78637	4.81562	52.6552	5.90682e-12	Chemokines	Cytokines
CXCL6	3.7809	0.992923	57.8638	6.94567e-13	Antimicrobials	Chemokines	Cytokines
MCEMP1	3.67062	-0.687538	98.7403	1.28414e-19	Nonimmune-related
AC008763.3	3.62632	-0.849052	41.1833	7.70175e-10	Nonimmune-related
PI3	3.56405	3.48758	42.9339	3.60943e-10	Antimicrobials
IL2RA	3.47025	2.06251	68.3622	1.05041e-14	Cytokine_Receptors	Interleukins_Receptor
F13A1	3.39565	6.43247	80.521	9.89507e-17	Nonimmune-related
MMP7	3.31943	2.68623	55.2773	2.00014e-12	Nonimmune-related
MARCO	3.16008	2.56189	59.7115	3.28306e-13	Antimicrobials
LRRC15	3.13882	0.923688	54.0414	3.32776e-12	Nonimmune-related
CD300E	3.10737	0.390211	102.793	3.07425e-20	Nonimmune-related
FPR2	3.04641	0.758612	104.201	1.88033e-20	Chemokine_Receptors	Cytokine_Receptors
CCL20	3.02481	0.603123	72.3056	2.26461e-15	Antimicrobials	Chemokines	Cytokines
CR1	2.97696	1.28614	74.02	1.16982e-15	Nonimmune-related
AREG	2.93613	0.907628	53.752	3.75032e-12	Cytokines
S100A8	2.90119	3.83299	112.965	9.26039e-22	Antimicrobials
IGLL5	2.8459	0.243006	33.8597	1.95207e-08	Nonimmune-related
UBD	2.78569	2.93443	111.883	1.33767e-21	Nonimmune-related
IDO1	2.78433	0.760945	60.7405	2.16766e-13	Antimicrobials
RARRES1	2.77637	3.37378	70.6325	4.33101e-15	Nonimmune-related
LILRA5	2.75841	0.111877	103.524	2.37059e-20	Nonimmune-related
LYZ	2.72838	5.42753	148.642	9.30085e-27	Antimicrobials
TREM1	2.72744	3.21351	83.4261	3.33875e-17	Nonimmune-related
FCGR2B	2.71709	3.88044	113.355	8.11369e-22	BCRSignalingPathway
PLA2G2A	2.707	5.29912	30.0437	1.09743e-07	Antimicrobials
S100A9	2.69149	4.89816	104.094	1.95698e-20	Antimicrobials
CXCL8	2.67227	5.24641	45.507	1.19651e-10	Antimicrobials	Chemokines	Cytokines
MYBPH	2.65606	2.23054	72.5062	2.09574e-15	Nonimmune-related
CCR2	2.61516	0.422655	107.408	6.15499e-21	Nonimmune-related
JCHAIN	2.6075	1.87537	37.847	3.31614e-09	Nonimmune-related
CTLA4	2.58397	-0.150308	67.2414	1.63005e-14	TCRsignalingPathway
DKK1	2.51957	2.79061	35.7433	8.41627e-09	Cytokines
KRT75	2.48642	0.769036	37.2133	4.38613e-09	Nonimmune-related
ADGRG7	2.4778	-0.0499034	29.0707	1.71301e-07	Nonimmune-related
CD163	2.47581	7.16215	81.1628	7.77658e-17	Nonimmune-related
SLPI	2.4636	3.92708	48.3896	3.52051e-11	Antimicrobials
RNASE2	2.46137	2.89579	145.72	2.27977e-26	Antimicrobials	Chemokines	Cytokines
IBSP	2.45598	3.51448	35.1528	1.09479e-08	Nonimmune-related
CD209	2.44945	1.5605	41.33	7.22621e-10	Antigen_Processing_and_Presentation
AQP9	2.44932	2.44918	66.674	2.03918e-14	Antimicrobials
IL6	2.41293	1.84639	56.5606	1.18196e-12	Antimicrobials	Cytokines	Interleukins
AKAP14	2.40184	-0.18556	33.2877	2.52384e-08	Nonimmune-related
ADGRE1	2.38431	1.59053	112.523	1.06737e-21	Nonimmune-related
FCN1	2.35705	0.333817	66.2186	2.43757e-14	Nonimmune-related
C15orf48	2.32612	0.7315	78.4292	2.17009e-16	Nonimmune-related
CXCL3	2.32023	1.58521	60.9902	1.96038e-13	Antimicrobials	Chemokines	Cytokines
LTF	2.31388	8.9342	24.4845	1.43824e-06	Antimicrobials
RNASE3	2.30657	0.149072	118.116	1.62035e-22	Antimicrobials
TIMD4	2.30537	-0.987964	60.2682	2.61779e-13	Nonimmune-related
CLEC10A	2.28008	0.230856	59.9163	3.01966e-13	Nonimmune-related
IL10	2.2747	0.326382	101.786	4.35668e-20	Antimicrobials	Cytokines	TCRsignalingPathway
OR2I1P	2.26997	-0.89033	63.8193	6.30254e-14	Nonimmune-related
MMP19	2.26717	3.38278	65.4035	3.36845e-14	Nonimmune-related
CXCL10	2.26702	4.09314	61.3166	1.7193e-13	Antimicrobials	Chemokines	Cytokines
LUM	2.26581	5.32131	45.7381	1.08417e-10	Nonimmune-related
FCER1A	2.25869	0.112588	48.1056	3.96893e-11	Nonimmune-related
HSH2D	2.25618	-0.633676	76.1833	5.08958e-16	Nonimmune-related
C6orf141	2.24767	2.13315	58.2658	5.89823e-13	Nonimmune-related
TMPRSS2	2.24555	0.569592	29.882	1.18158e-07	Nonimmune-related
HK3	2.23675	2.50845	123.435	2.77864e-23	Nonimmune-related
ZBP1	2.21087	0.587534	72.7922	1.87048e-15	Nonimmune-related
CFB	2.20612	4.50157	114.392	5.71183e-22	Nonimmune-related
CSTA	2.19111	1.49137	147.856	1.16994e-26	Nonimmune-related
IL7R	2.18784	2.21208	99.9466	8.34039e-20	Antimicrobials	Cytokine_Receptors	Interleukins_Receptor
IL21R	2.18098	1.96305	76.5585	4.42452e-16	Cytokine_Receptors	Interleukins_Receptor
HAMP	2.17544	3.77421	97.6562	1.88678e-19	Antimicrobials	Cytokines
S100A4	2.15807	4.62652	150.618	5.07849e-27	Nonimmune-related
SERPINA1	2.15062	6.05019	179.315	1.09203e-30	Nonimmune-related
PRG4	2.14853	2.38044	15.3777	0.000115892	Nonimmune-related
MEDAG	2.14634	2.05773	33.5719	2.22116e-08	Nonimmune-related
LILRB2	2.1399	2.49406	150.189	5.72078e-27	Nonimmune-related
GPR84	2.12649	1.58122	139.259	1.69989e-25	Nonimmune-related
TNFSF14	2.12159	1.15298	70.3917	4.7422e-15	Cytokines	TNF_Family_Members
GBP5	2.11956	2.52699	116.539	2.75089e-22	Nonimmune-related
BCL2A1	2.11741	2.48458	106.602	8.14707e-21	Nonimmune-related
CLEC12A	2.11425	0.591254	70.0209	5.4748e-15	Nonimmune-related
COL6A3	2.11136	6.50715	24.4487	1.4626e-06	Nonimmune-related
TMEM150B	2.10273	-0.906906	92.3021	1.27924e-18	Nonimmune-related
CD48	2.09892	2.58979	118.718	1.32608e-22	NaturalKiller_Cell_Cytotoxicity
IL1RN	2.09608	1.89772	61.9871	1.31369e-13	Cytokines	Interleukins
LRRC8E	2.09197	-0.120378	27.3696	3.74986e-07	Nonimmune-related
CXCL11	2.08069	2.2113	48.6949	3.09516e-11	Antimicrobials	Chemokines	Cytokines
LYVE1	2.07584	3.39132	41.7235	6.09213e-10	Nonimmune-related
ALPK2	2.07402	1.54252	28.812	1.92898e-07	Nonimmune-related
GPR141	2.07231	-0.986968	96.5243	2.80612e-19	Nonimmune-related
CHI3L2	2.05895	7.96929	52.9732	5.17682e-12	Nonimmune-related
MS4A4A	2.0559	4.56138	116.739	2.59146e-22	Nonimmune-related
FPR3	2.0508	3.43471	85.0862	1.80297e-17	Nonimmune-related
CCL2	2.04119	6.0245	71.5328	3.0539e-15	Antimicrobials	Chemokines	Cytokines
IFI30	2.0357	6.91582	154.934	1.36998e-27	Antigen_Processing_and_Presentation
VSTM1	2.03494	-0.589403	56.6673	1.12899e-12	Nonimmune-related
TNFSF12-TNFSF13	2.03046	1.93091	37.7914	3.39833e-09	Nonimmune-related
VNN2	2.02892	1.6579	108.244	4.61436e-21	Nonimmune-related
CD36	2.02646	3.17097	44.7365	1.6634e-10	Nonimmune-related
CHI3L1	2.02307	11.6854	44.8044	1.61574e-10	Nonimmune-related
CEACAM4	2.02156	-1.04534	86.8004	9.52595e-18	Nonimmune-related
TLR8	2.02016	1.77717	103.529	2.36643e-20	Antimicrobials
LILRB3	2.02012	1.78578	132.556	1.43157e-24	BCRSignalingPathway
GZMA	2.01473	0.598431	87.5127	7.33059e-18	Nonimmune-related
GZMK	2.01311	0.165612	64.3767	5.04556e-14	Nonimmune-related
S100A12	2.0116	-1.11843	44.7811	1.63075e-10	Antimicrobials
TDO2	2.0099	1.86559	53.3087	4.50499e-12	Nonimmune-related
OASL	1.99955	3.00715	76.8237	4.00495e-16	Antimicrobials
DTHD1	1.97794	1.16769	30.4863	8.96841e-08	Nonimmune-related
MME	1.97215	1.09059	31.5144	5.62072e-08	Nonimmune-related
MYO1G	1.97159	2.6154	127.879	6.48187e-24	Nonimmune-related
FABP4	1.97088	0.602779	26.3652	5.97443e-07	Antimicrobials
SLAMF6	1.96782	0.0396774	104.966	1.43415e-20	Nonimmune-related
MS4A6A	1.96718	6.06086	123.702	2.56397e-23	Nonimmune-related
TNFRSF9	1.96517	-1.00319	75.1901	7.4386e-16	Cytokine_Receptors	TNF_Family_Members_Receptors
MMP1	1.96157	0.293854	21.5215	5.84443e-06	Nonimmune-related
FCGBP	1.96056	8.7815	81.7398	6.26482e-17	Nonimmune-related
JAML	1.95403	1.49952	87.856	6.46257e-18	Nonimmune-related
CSF3	1.95219	0.205571	20.5928	9.11357e-06	Cytokines
CXCR3	1.94399	-0.89444	64.6724	4.48638e-14	Chemokine_Receptors	Cytokine_Receptors	Interleukins_Receptor
CCR5	1.93623	2.60594	168.134	2.68649e-29	Antimicrobials	Chemokine_Receptors	Cytokine_Receptors
RSAD2	1.93338	4.85419	65.5002	3.24188e-14	Antimicrobials
CATSPER1	1.9306	-0.98793	110.223	2.33899e-21	Nonimmune-related
VSIG4	1.92526	6.98427	104.5	1.69864e-20	Nonimmune-related
FAM92B	1.92137	-0.203148	20.3465	1.02573e-05	Nonimmune-related
APOL1	1.9181	4.88605	108.508	4.24407e-21	Nonimmune-related
FCGR3A	1.91432	7.41757	149.374	7.42918e-27	NaturalKiller_Cell_Cytotoxicity
SIGLEC1	1.91152	4.12629	57.3289	8.63661e-13	Nonimmune-related
SPP1	1.90958	11.4087	90.926	2.11871e-18	Cytokines
C11orf88	1.90949	1.25628	17.8885	3.37061e-05	Nonimmune-related
CD2	1.90302	1.21777	78.8284	1.86415e-16	Nonimmune-related
SLAMF1	1.90216	-1.11052	81.148	7.78301e-17	Nonimmune-related
MRC1	1.90038	3.39528	42.1209	5.12878e-10	Nonimmune-related
MSR1	1.89715	5.91307	131.66	1.92802e-24	Antimicrobials
GPR65	1.89699	3.24892	170.512	1.34471e-29	Nonimmune-related
ACP5	1.88961	2.86473	59.7047	3.29206e-13	Nonimmune-related
ITK	1.88725	0.96004	81.9462	5.77147e-17	TCRsignalingPathway
HLA-DQA1	1.87412	5.49693	68.7795	8.92072e-15	Antigen_Processing_and_Presentation
HLA-DQA2	1.8688	2.98789	40.1933	1.18519e-09	Antigen_Processing_and_Presentation
CARD16	1.86849	3.22532	154.133	1.72328e-27	Nonimmune-related
THBS1	1.86323	6.16616	39.3746	1.69514e-09	Antigen_Processing_and_Presentation
SIGLEC7	1.86203	2.19072	120.98	6.24343e-23	Nonimmune-related
LBP	1.85328	-0.282083	21.096	7.16182e-06	Antimicrobials
CHIT1	1.85031	3.03068	30.2152	1.01484e-07	Antimicrobials
LY96	1.84971	3.14469	123.497	2.72187e-23	Nonimmune-related
NNMT	1.8479	6.28397	36.2665	6.6708e-09	Nonimmune-related
PTX3	1.84362	4.87294	45.2371	1.34273e-10	Antimicrobials
BATF	1.84318	0.407349	120.542	7.21993e-23	Nonimmune-related
SLAMF7	1.83924	0.471207	74.5583	9.47582e-16	Nonimmune-related
CD14	1.83873	7.1343	124.132	2.22619e-23	Antimicrobials
CD3D	1.83648	-0.0121469	66.9413	1.82908e-14	TCRsignalingPathway
NAMPT	1.8363	8.71343	91.5956	1.66169e-18	Cytokines
GZMB	1.83254	-0.330762	69.2537	7.38439e-15	NaturalKiller_Cell_Cytotoxicity
CASP5	1.83156	-1.16161	115.563	3.81613e-22	Nonimmune-related
SLAMF8	1.83154	3.48019	105.807	1.07886e-20	Nonimmune-related
SNX20	1.82835	2.52038	170.647	1.29321e-29	Nonimmune-related
GAPT	1.82751	2.18837	152.005	3.28692e-27	Nonimmune-related
BIRC3	1.8242	3.47026	85.3778	1.61852e-17	Nonimmune-related
CXCL9	1.82354	2.50852	42.3322	4.68058e-10	Antimicrobials	Chemokines	Cytokines
ODF3B	1.82352	2.45709	74.438	9.94442e-16	Nonimmune-related
ADAMDEC1	1.82208	1.86999	27.1801	4.09356e-07	Nonimmune-related
KYNU	1.81779	1.99424	189.508	6.17055e-32	Nonimmune-related
LILRA6	1.81684	1.4442	90.9768	2.06822e-18	Nonimmune-related
PTPN22	1.81125	0.768907	129.6	3.70954e-24	Nonimmune-related
ACPP	1.80731	0.491334	82.8388	4.13503e-17	Nonimmune-related
C5AR1	1.80573	4.44404	93.6087	8.02991e-19	Chemokine_Receptors	Cytokine_Receptors
CLEC5A	1.80498	3.76409	71.4868	3.1088e-15	Nonimmune-related
DOK2	1.80473	1.27056	71.4626	3.12608e-15	Nonimmune-related
TYMP	1.80172	5.09129	132.09	1.67938e-24	Chemokines	Cytokines
ACTG2	1.79882	3.24167	27.0866	4.27485e-07	Nonimmune-related
GPR171	1.79204	-1.56957	72.5773	2.03101e-15	Nonimmune-related
HLA-DRA	1.79047	9.50119	137.132	3.36414e-25	Antigen_Processing_and_Presentation
ALOX5AP	1.78846	5.93081	149.141	7.97876e-27	Nonimmune-related
FAM177B	1.78751	-0.431284	84.1229	2.564e-17	Nonimmune-related
CD52	1.78655	1.80699	86.6112	1.02133e-17	Nonimmune-related
KCNJ15	1.78497	-0.447212	42.212	4.92457e-10	Nonimmune-related
CD300LB	1.77803	-0.64246	97.3461	2.09357e-19	Nonimmune-related
APOBEC3H	1.77655	-1.35666	126.122	1.14946e-23	Antimicrobials
CD3G	1.77497	-0.757568	71.3433	3.27414e-15	TCRsignalingPathway
FPR1	1.77416	5.31365	90.4882	2.48407e-18	Chemokine_Receptors	Cytokine_Receptors
FCER1G	1.77268	5.89669	190.274	5.07672e-32	Antigen_Processing_and_Presentation	NaturalKiller_Cell_Cytotoxicity
KLHDC7B	1.77203	0.0747501	95.7758	3.66667e-19	Nonimmune-related
SECTM1	1.76395	3.38836	79.2715	1.58408e-16	Cytokines
NOD2	1.7636	1.56412	143.605	4.35983e-26	Antimicrobials
CD70	1.76004	0.403253	18.0047	3.18496e-05	Cytokines
FCGR3B	1.758	1.57816	61.8237	1.39843e-13	NaturalKiller_Cell_Cytotoxicity
APOBEC3A	1.75459	-1.37052	36.0517	7.33228e-09	Antimicrobials
LIF	1.74615	4.32047	36.1243	7.10543e-09	Cytokines
AL645922.1	1.74438	0.606031	24.5436	1.39889e-06	Nonimmune-related
FAM20A	1.74283	3.43181	60.3711	2.51553e-13	Nonimmune-related
CD96	1.74009	0.0545872	83.5344	3.19101e-17	Nonimmune-related
IL1R2	1.73302	0.98049	31.1063	6.76435e-08	Cytokine_Receptors	Interleukins_Receptor
ABCC3	1.73014	5.89435	40.557	1.01143e-09	Nonimmune-related
MLPH	1.72902	0.646892	31.247	6.34581e-08	Nonimmune-related
GSDMA	1.7274	0.512113	32.5756	3.47817e-08	Nonimmune-related
CASP1	1.72674	4.55328	234.161	4.88522e-37	Nonimmune-related
CTSS	1.72586	6.11115	176.017	2.79452e-30	Antigen_Processing_and_Presentation	Antimicrobials
CD80	1.72295	-1.35887	81.2441	7.50751e-17	Nonimmune-related
IL15	1.72238	0.943456	146.143	1.98415e-26	Antimicrobials	Cytokines	Interleukins
HLA-DRB1	1.71982	7.68216	113.746	7.10579e-22	Antigen_Processing_and_Presentation
C1QA	1.71593	7.81202	135.531	5.59155e-25	Nonimmune-related
LCK	1.71583	0.591754	86.6857	9.93663e-18	NaturalKiller_Cell_Cytotoxicity	TCRsignalingPathway
PLAUR	1.71412	4.67236	104.051	1.98603e-20	Chemokine_Receptors	Cytokine_Receptors
C2	1.71407	5.10005	109.395	3.13029e-21	Nonimmune-related
OAS1	1.71373	5.42925	76.5239	4.48918e-16	Antimicrobials
FCGR2A	1.71121	6.13784	162.378	1.47976e-28	Nonimmune-related
LILRB5	1.7054	0.518542	32.5006	3.598e-08	Nonimmune-related
CD1D	1.70341	0.961813	89.8098	3.16259e-18	Antigen_Processing_and_Presentation
HP	1.70299	4.69744	18.3788	2.65471e-05	Nonimmune-related
CA3	1.70259	5.23189	23.6424	2.13736e-06	Nonimmune-related
HLA-DQB1	1.70187	5.83207	45.5741	1.16278e-10	Antigen_Processing_and_Presentation
OAS2	1.69687	5.40855	84.9286	1.91126e-17	Nonimmune-related
TNFSF8	1.69584	1.5489	134.039	8.90346e-25	Cytokines	TNF_Family_Members
CCR7	1.69342	-0.500652	68.6266	9.43704e-15	Antimicrobials	Chemokine_Receptors	Cytokine_Receptors
GBP1	1.69155	6.52075	96.5862	2.76196e-19	Nonimmune-related
CALHM6	1.69064	2.5651	90.0682	2.87834e-18	Nonimmune-related
ADAM8	1.68692	2.96799	55.6316	1.72935e-12	Nonimmune-related
PTPN7	1.67655	2.60329	158.545	4.56858e-28	Nonimmune-related
VAMP8	1.67511	4.97798	153.344	2.21624e-27	Nonimmune-related
IL2RB	1.67376	1.40969	83.6095	3.10313e-17	Cytokine_Receptors	Interleukins_Receptor
MNDA	1.67098	3.73972	173.707	5.34191e-30	Nonimmune-related
GALNT5	1.66918	2.02963	27.2499	3.96355e-07	Nonimmune-related
SCNN1G	1.66915	0.329096	27.2182	4.02201e-07	Nonimmune-related
ETV7	1.66815	1.49523	81.5877	6.6005e-17	Nonimmune-related
LRRC25	1.66802	3.35431	173.577	5.54486e-30	Nonimmune-related
GPR82	1.66794	1.74798	71.1367	3.54735e-15	Nonimmune-related
SIRPG	1.66047	-1.49927	63.3657	7.54648e-14	Nonimmune-related
SLC11A1	1.66045	5.70089	97.6087	1.91894e-19	Antimicrobials
SIGLEC9	1.65848	2.93123	160.496	2.55282e-28	Nonimmune-related
FOLR2	1.65388	4.49151	57.0272	9.76804e-13	Nonimmune-related
C1QB	1.64919	8.47289	132.435	1.50339e-24	Nonimmune-related
CXCR6	1.64827	-0.0866254	55.0929	2.15233e-12	Antimicrobials	Cytokine_Receptors	Interleukins_Receptor
ADGRE2	1.64799	3.27309	113.839	6.83068e-22	Nonimmune-related
COL1A1	1.64067	8.60157	21.0498	7.32173e-06	Nonimmune-related
CCL5	1.63611	2.69989	83.4722	3.26575e-17	Antimicrobials	Chemokines	Cytokines
LY9	1.6352	-1.42381	62.9188	9.02036e-14	Nonimmune-related
HMOX1	1.63509	6.9297	76.4934	4.54162e-16	Antimicrobials
CYP19A1	1.63486	1.56302	56.6816	1.12198e-12	Nonimmune-related
C1S	1.63421	7.52482	98.4801	1.40821e-19	Nonimmune-related
HBG2	1.63395	0.423658	27.3846	3.72398e-07	Nonimmune-related
SERPINE1	1.63197	7.43417	37.6184	3.66783e-09	Nonimmune-related
HLA-DMB	1.63173	6.39274	141.026	9.86669e-26	Antigen_Processing_and_Presentation
LAIR1	1.62634	5.42587	184.133	2.79998e-31	Nonimmune-related
CXCR2	1.626	0.724981	86.0835	1.24071e-17	Chemokine_Receptors	Cytokine_Receptors	Interleukins_Receptor
PAPPA	1.62534	1.40538	25.9794	7.14927e-07	Nonimmune-related
TP63	1.61433	0.996822	21.1804	6.8786e-06	Nonimmune-related
RAC2	1.61197	3.78244	177.211	1.95649e-30	BCRSignalingPathway	NaturalKiller_Cell_Cytotoxicity
FAM183A	1.61095	1.98268	15.1149	0.000132048	Nonimmune-related
CDCP1	1.61079	3.28922	77.5222	3.06979e-16	Nonimmune-related
CD300LF	1.60608	1.86003	115.884	3.42537e-22	Nonimmune-related
SCIN	1.60596	5.39879	78.4506	2.16022e-16	Nonimmune-related
PPBP	1.6049	-0.831834	30.3271	9.64062e-08	Antimicrobials	Chemokines	Cytokines
SIT1	1.60045	-0.820772	72.0303	2.50914e-15	Nonimmune-related
CYTIP	1.59832	2.43818	165.583	5.67122e-29	Nonimmune-related
PTPRB	1.59415	5.85461	28.0192	2.77812e-07	Nonimmune-related
CD5	1.59114	0.134938	78.7353	1.93098e-16	Nonimmune-related
SRPX2	1.58667	4.772	39.2927	1.75703e-09	Nonimmune-related
CYBB	1.58578	6.30345	138.72	2.03667e-25	Antimicrobials
HLA-DPA1	1.58403	8.21437	119.966	8.8193e-23	Antigen_Processing_and_Presentation
MS4A7	1.58337	5.25468	107.173	6.72459e-21	Nonimmune-related
KRT80	1.58231	-0.52911	30.1038	1.06746e-07	Nonimmune-related
TIMP1	1.58081	8.51917	69.6865	6.25961e-15	Nonimmune-related
PLAC8	1.57995	1.76692	46.3283	8.42149e-11	Nonimmune-related
CLDN23	1.5766	0.844322	73.7333	1.30084e-15	Nonimmune-related
HLA-DOA	1.57625	5.32977	114.231	6.03195e-22	Antigen_Processing_and_Presentation
NKG7	1.57618	1.08336	90.8434	2.17092e-18	Nonimmune-related
ICAM1	1.57534	5.49874	74.8502	8.50747e-16	Antigen_Processing_and_Presentation	NaturalKiller_Cell_Cytotoxicity
CCR1	1.57525	4.18093	138.654	2.07195e-25	Antimicrobials	Chemokine_Receptors	Cytokine_Receptors
C7	1.57518	4.00267	20.674	8.76581e-06	Nonimmune-related
DAPP1	1.57465	1.25968	128.898	4.65679e-24	Nonimmune-related
MS4A4E	1.57234	-1.13259	56.0343	1.4624e-12	Nonimmune-related
C1R	1.57109	8.20651	97.6395	1.898e-19	Nonimmune-related
CLEC2B	1.5696	2.95207	85.8368	1.35928e-17	Nonimmune-related
CD300C	1.56831	1.6292	160.872	2.28229e-28	Nonimmune-related
CCL8	1.56582	0.232611	29.6407	1.3191e-07	Antimicrobials	Chemokines	Cytokines
OSCAR	1.56442	2.62024	177.806	1.6515e-30	Nonimmune-related
ARL11	1.56253	1.78616	161.012	2.18903e-28	Nonimmune-related
COL1A2	1.55775	8.89252	24.9712	1.14479e-06	Nonimmune-related
PLAAT4	1.55698	5.83647	112.244	1.183e-21	Antimicrobials
CST7	1.55421	0.409417	91.4325	1.75288e-18	Nonimmune-related
CHRNA6	1.55328	-1.05332	36.1717	6.94895e-09	Nonimmune-related
NLRP12	1.5523	-1.25436	76.817	3.99794e-16	Nonimmune-related
MILR1	1.55115	2.69826	147.526	1.2953e-26	Nonimmune-related
S100A11	1.54977	6.9048	136.56	4.03249e-25	Antimicrobials
FCGR1A	1.54756	5.37352	137.35	3.13924e-25	Nonimmune-related
CD74	1.54668	10.8242	140.637	1.10242e-25	Antigen_Processing_and_Presentation
GBP3	1.54593	5.40754	62.7486	9.68521e-14	Nonimmune-related
VENTX	1.54403	1.07094	68.2989	1.07295e-14	Nonimmune-related
CLEC17A	1.5436	1.03239	44.3928	1.92401e-10	Nonimmune-related
C1QC	1.53996	8.19729	130.043	3.2468e-24	Nonimmune-related
DPYD	1.53804	5.47391	103.78	2.18319e-20	Nonimmune-related
CD68	1.53803	7.23012	137.633	2.87038e-25	Nonimmune-related
SRGN	1.53673	6.78648	106.625	8.12492e-21	Nonimmune-related
SCIMP	1.5304	2.67077	129.699	3.59346e-24	Nonimmune-related
LAPTM5	1.5299	8.51303	174.664	4.05849e-30	Nonimmune-related
C3	1.52911	9.94487	107.88	5.25735e-21	Chemokines	Cytokines
LRG1	1.52506	-0.0705689	65.9847	2.66772e-14	Nonimmune-related
LAMP3	1.52498	0.749761	60.547	2.33661e-13	Nonimmune-related
EMB	1.52483	3.45557	111.377	1.57715e-21	Nonimmune-related
FBP1	1.52317	3.1073	112.935	9.28029e-22	Nonimmune-related
APOC4-APOC2	1.52151	5.97708	80.5356	9.84076e-17	Nonimmune-related
C6orf15	1.52137	2.36449	9.9054	0.00186355	Nonimmune-related
STAB1	1.52126	6.85083	91.9437	1.46483e-18	Nonimmune-related
CD53	1.51742	6.06458	178.518	1.36356e-30	Nonimmune-related
NCF4	1.51632	3.4006	162.663	1.34144e-28	Nonimmune-related
ELF3	1.5163	0.647977	44.0061	2.27134e-10	Nonimmune-related
ALOX5	1.51514	4.50662	163.86	9.45991e-29	Nonimmune-related
PLEK	1.51382	4.62709	132.118	1.66435e-24	Nonimmune-related
RHOH	1.51224	1.36676	119.812	9.20288e-23	Nonimmune-related
TMEM71	1.51173	2.49621	74.475	9.7834e-16	Nonimmune-related
LILRB1	1.51099	3.70661	130.278	2.97969e-24	Nonimmune-related
CTSC	1.51094	6.35047	92.7219	1.1056e-18	Nonimmune-related
CD3E	1.50903	1.40626	56.0885	1.43028e-12	TCRsignalingPathway
IL2RG	1.50716	2.20814	110.293	2.28365e-21	Cytokine_Receptors	Interleukins_Receptor
GNA15	1.50549	3.10751	137.425	3.03332e-25	Nonimmune-related
TYROBP	1.50468	6.44416	140.811	1.0555e-25	NaturalKiller_Cell_Cytotoxicity
SOD2	1.50353	10.1208	70.1925	5.13945e-15	Nonimmune-related
MX1	1.50301	6.99344	51.5807	9.23488e-12	Antimicrobials
IL10RA	1.50262	4.74725	121.045	6.16542e-23	Cytokine_Receptors	Interleukins_Receptor
CD33	1.50179	2.92954	166.017	4.99164e-29	Nonimmune-related
CASP4	1.49843	4.45428	171.167	1.11449e-29	Nonimmune-related
SAMSN1	1.49839	4.10847	134.625	7.40799e-25	Nonimmune-related
HLA-DPB1	1.49657	7.40255	112.494	1.08676e-21	Antigen_Processing_and_Presentation
HLA-DMA	1.4955	6.1268	156.701	8.04642e-28	Antigen_Processing_and_Presentation
CXCR1	1.49499	-0.513587	27.947	2.87122e-07	Antimicrobials	Chemokine_Receptors	Cytokine_Receptors	Interleukins_Receptor
HCST	1.4948	3.06811	155.747	1.05855e-27	NaturalKiller_Cell_Cytotoxicity
IL4I1	1.49478	2.16943	74.2597	1.06261e-15	Nonimmune-related
PDCD1LG2	1.49364	2.51345	78.8807	1.82768e-16	Nonimmune-related
SCNN1B	1.49342	2.21054	16.12	8.02625e-05	Nonimmune-related
CSF2RB	1.49127	2.49023	114.611	5.26121e-22	Cytokine_Receptors
DPP4	1.4904	3.1176	32.0618	4.38683e-08	Nonimmune-related
DENND2D	1.48663	2.76251	144.222	3.59871e-26	Nonimmune-related
OSM	1.48649	2.34859	35.9654	7.62494e-09	Cytokines
ANPEP	1.48556	3.43072	44.4152	1.90889e-10	Nonimmune-related
ROPN1L	1.48066	1.37255	18.768	2.19753e-05	Nonimmune-related
PRF1	1.47897	2.1883	46.1543	9.07069e-11	NaturalKiller_Cell_Cytotoxicity
PTPRC	1.47706	5.05939	107.783	5.44826e-21	TCRsignalingPathway
CD28	1.47668	-0.203638	41.4419	6.87314e-10	TCRsignalingPathway
AIF1	1.47597	5.62938	130.115	3.17159e-24	Nonimmune-related
SPAG17	1.47352	1.68813	14.8182	0.000153065	Nonimmune-related
NCF2	1.47295	3.98546	170.43	1.37723e-29	Nonimmune-related
CLEC7A	1.47267	3.58649	127.687	6.89996e-24	Nonimmune-related
TLR2	1.47087	4.78651	135.776	5.16588e-25	Antimicrobials
SIGLEC5	1.47033	1.01647	75.0558	7.83084e-16	Nonimmune-related
MSMP	1.46988	4.12598	11.337	0.000889075	Nonimmune-related
ITGB2	1.46864	7.11411	155.471	1.1607e-27	NaturalKiller_Cell_Cytotoxicity
CD300A	1.46852	4.36914	133.824	9.59701e-25	Nonimmune-related
ST14	1.46843	3.8222	61.548	1.56668e-13	Nonimmune-related
SASH3	1.46665	4.68831	175.018	3.67437e-30	Nonimmune-related
HCAR2	1.46665	-0.893847	28.4856	2.23987e-07	Nonimmune-related
HCK	1.46634	4.63054	149.248	7.68215e-27	Antimicrobials
GBP4	1.46626	4.72195	62.9051	9.09821e-14	Nonimmune-related
CD200R1	1.4627	-0.558036	59.7032	3.28479e-13	Nonimmune-related
CD86	1.4594	4.25426	152.107	3.19022e-27	Antimicrobials
VNN1	1.45856	0.498718	73.0915	1.66553e-15	Nonimmune-related
MAP3K19	1.45703	2.15037	12.2755	0.0005504	Nonimmune-related
CTSW	1.45682	0.416387	85.1018	1.78347e-17	Nonimmune-related
RGS18	1.45668	2.05849	95.0448	4.76412e-19	Nonimmune-related
HAVCR2	1.45628	5.49421	160.405	2.64755e-28	Nonimmune-related
ESR2	1.45611	0.678305	26.0983	6.76361e-07	Cytokine_Receptors
CHRNA9	1.45358	2.7112	18.9085	2.05281e-05	Nonimmune-related
RDH10	1.45132	5.82717	69.2882	7.31205e-15	Nonimmune-related
GCNT1	1.45083	2.44888	64.6598	4.50886e-14	Nonimmune-related
CXCL1	1.44939	1.53197	24.1639	1.67203e-06	Antimicrobials	Chemokines	Cytokines
SUCNR1	1.44885	0.355351	62.5349	1.05172e-13	Nonimmune-related
TACSTD2	1.44865	-0.313062	33.7132	2.08244e-08	Nonimmune-related
PARP15	1.44765	0.519417	95.2616	4.40781e-19	Nonimmune-related
TMIGD3	1.44568	4.51677	74.1377	1.11809e-15	Nonimmune-related
NTRK1	1.44088	1.98992	14.5818	0.000172213	Nonimmune-related
GZMH	1.43992	-0.373688	50.8042	1.27423e-11	Nonimmune-related
AC006978.2	1.43983	-0.879375	28.8559	1.88926e-07	Nonimmune-related
TTC29	1.43961	0.349287	19.2765	1.71783e-05	Nonimmune-related
PLEK2	1.43878	1.17016	54.4239	2.83502e-12	Nonimmune-related
SIRPB2	1.43844	2.60166	102.586	3.29075e-20	Nonimmune-related
AOAH	1.43783	3.62446	101.758	4.40539e-20	Nonimmune-related
CD180	1.43659	2.96447	105.85	1.0553e-20	Nonimmune-related
SLC7A7	1.43384	4.72286	169.227	1.95827e-29	Nonimmune-related
GPRC5A	1.43221	3.08983	31.52	5.60657e-08	Nonimmune-related
S100A10	1.42986	7.46511	62.9743	8.84991e-14	Antimicrobials
HLA-B	1.42434	10.0062	107.416	6.15071e-21	Antigen_Processing_and_Presentation	Antimicrobials	NaturalKiller_Cell_Cytotoxicity
ELF5	1.42348	-1.44821	23.725	2.05525e-06	Nonimmune-related
TLR1	1.42336	3.50995	133.762	9.72682e-25	Antimicrobials
GPR183	1.42251	3.46187	75.6367	6.28793e-16	Nonimmune-related
HLA-DQB2	1.42221	1.42487	37.2171	4.37433e-09	Nonimmune-related
IGFBP6	1.42096	3.66126	33.0608	2.79506e-08	Nonimmune-related
CIITA	1.42076	4.64546	95.4445	4.1536e-19	Antigen_Processing_and_Presentation
SPOCD1	1.41899	6.05201	24.4365	1.47099e-06	Nonimmune-related
ISG15	1.41861	6.34758	40.4598	1.05518e-09	Antimicrobials
THBD	1.41388	3.66692	54.0729	3.28474e-12	Nonimmune-related
SLAMF9	1.41347	-0.386268	19.0579	1.90946e-05	Nonimmune-related
FYB1	1.41326	4.91988	106.715	7.87732e-21	Nonimmune-related
APOC1	1.41238	7.41466	77.566	3.02056e-16	Nonimmune-related
TFEC	1.4108	3.04012	119.767	9.33982e-23	Nonimmune-related
MAP3K8	1.40755	2.99704	95.6065	3.89566e-19	TCRsignalingPathway
ASGR2	1.40643	-0.547613	77.6907	2.86828e-16	Nonimmune-related
TRIM29	1.40635	0.874172	20.5469	9.3166e-06	Nonimmune-related
TSLP	1.40494	0.0556267	33.8589	1.95071e-08	Cytokines
GBP2	1.39904	5.87459	75.8358	5.83596e-16	Antimicrobials
PDE6G	1.3987	-0.552078	109.25	3.26489e-21	Nonimmune-related
LY86	1.39842	4.4516	117.903	1.75087e-22	Nonimmune-related
RNASE6	1.39604	4.34586	122.436	3.87664e-23	Nonimmune-related
IL24	1.39322	-1.02826	45.2224	1.34883e-10	Cytokines	Interleukins
CMKLR1	1.39272	4.07852	87.5211	7.34704e-18	Chemokine_Receptors	Cytokine_Receptors
RIPK3	1.39255	1.49888	174.756	3.95067e-30	Nonimmune-related
SERPING1	1.39233	7.77305	99.5763	9.55261e-20	Nonimmune-related
FAM3B	1.3906	-0.564286	46.3571	8.31373e-11	Cytokines
CLCF1	1.39023	2.87908	40.1903	1.18679e-09	Cytokines
EPSTI1	1.38989	3.74173	85.372	1.61919e-17	Nonimmune-related
CD27	1.38892	-0.184279	66.411	2.25435e-14	Nonimmune-related
PIK3AP1	1.38785	4.58701	111.899	1.33045e-21	Nonimmune-related
ATP6V0D2	1.38739	-1.15939	18.959	2.00317e-05	Nonimmune-related
CFAP161	1.38709	0.294521	17.3976	4.28404e-05	Nonimmune-related
CYTH4	1.38584	4.59094	149.986	6.10181e-27	Nonimmune-related
CLECL1	1.38561	-0.531176	48.2712	3.69368e-11	Nonimmune-related
TNFRSF6B	1.38185	1.89402	26.8722	4.7213e-07	Cytokine_Receptors	TNF_Family_Members_Receptors
COL3A1	1.38177	8.75012	13.7331	0.000263432	Nonimmune-related
C16orf54	1.38062	0.599168	136.584	3.95959e-25	Nonimmune-related
CD7	1.3804	0.653961	98.7026	1.29304e-19	Nonimmune-related
ALAS2	1.37958	-0.782728	16.7903	5.76985e-05	Nonimmune-related
SIGLEC10	1.37898	5.12909	87.5196	7.35116e-18	Nonimmune-related
IFI44L	1.3784	6.62305	35.3907	9.84642e-09	Nonimmune-related
EFCAB1	1.3779	2.29376	10.7136	0.00122551	Nonimmune-related
IL1R1	1.37719	4.1459	41.1013	7.98118e-10	Cytokine_Receptors	Interleukins_Receptor
TREM2	1.37652	6.37698	104.063	1.9778e-20	Nonimmune-related
PLEKHG6	1.37499	-1.44308	32.9629	2.91812e-08	Nonimmune-related
COL8A1	1.37327	5.14838	26.3082	6.13467e-07	Nonimmune-related
CXorf21	1.37278	1.28581	97.4904	1.98882e-19	Nonimmune-related
NFKBIZ	1.3724	3.69375	64.6244	4.58743e-14	Antimicrobials
RTP4	1.3723	2.59976	103.476	2.41096e-20	Nonimmune-related
ITGAL	1.36975	3.72496	102.207	3.76056e-20	NaturalKiller_Cell_Cytotoxicity
KIAA2012	1.36852	0.388357	13.6012	0.000281492	Nonimmune-related
CFI	1.36704	5.6562	51.708	8.75766e-12	Nonimmune-related
ARSI	1.36649	3.03681	26.5105	5.58412e-07	Nonimmune-related
HLA-DRB5	1.36583	6.05417	23.9242	1.87162e-06	Antigen_Processing_and_Presentation
TLR7	1.3657	3.78091	87.13	8.46324e-18	Antimicrobials
TEKT1	1.36394	3.34452	14.404	0.000188205	Nonimmune-related
SAMD9	1.35963	4.7623	83.0388	3.85683e-17	Nonimmune-related
ANKUB1	1.35955	0.0620552	16.1001	8.10539e-05	Nonimmune-related
NCF1	1.3593	3.11561	136.142	4.55624e-25	Nonimmune-related
SPI1	1.35901	5.28234	165.927	5.14186e-29	Nonimmune-related
TNFSF10	1.35648	3.77287	90.5575	2.41371e-18	Antimicrobials	TNF_Family_Members
MZB1	1.35618	-0.995572	25.9658	7.19078e-07	Nonimmune-related
TNFSF13B	1.35607	4.20232	86.0456	1.26471e-17	Cytokines	TNF_Family_Members
FERMT3	1.35324	4.74575	163.527	1.03904e-28	Nonimmune-related
NCKAP1L	1.35226	5.43476	141.44	8.63872e-26	Nonimmune-related
IL18	1.35213	4.03832	114.319	5.81787e-22	Antimicrobials	Cytokines	Interleukins
KMO	1.35176	1.20865	52.0354	7.62459e-12	Nonimmune-related
MAFB	1.35136	5.91504	88.7645	4.65805e-18	Nonimmune-related
FGL2	1.35017	4.85827	102.287	3.67929e-20	Nonimmune-related
C1orf162	1.35005	4.19845	120.581	7.14136e-23	Nonimmune-related
LOX	1.34965	5.22181	27.2447	3.9731e-07	Nonimmune-related
DOK3	1.34774	3.77759	155.102	1.28585e-27	Nonimmune-related
SOCS3	1.3472	6.35104	39.2184	1.81517e-09	Antimicrobials
GRAP2	1.3458	-0.610513	62.9956	8.7478e-14	TCRsignalingPathway
IL32	1.3441	4.71125	74.1976	1.0927e-15	Cytokines	Interleukins
P4HA3	1.34184	0.133971	33.0955	2.74899e-08	Nonimmune-related
LCP1	1.34118	5.81226	134.217	8.48921e-25	Nonimmune-related
CD4	1.3406	6.22347	158.198	5.09899e-28	Antigen_Processing_and_Presentation	Antimicrobials	TCRsignalingPathway
VAV1	1.33925	3.73139	140.002	1.34579e-25	BCRSignalingPathway	TCRsignalingPathway
FCGR1B	1.33759	3.37144	86.5294	1.05257e-17	Nonimmune-related
PIK3CG	1.33748	2.17264	77.7791	2.7737e-16	Antimicrobials	BCRSignalingPathway	NaturalKiller_Cell_Cytotoxicity	TCRsignalingPathway
GPR160	1.33683	1.79344	117.672	1.87962e-22	Nonimmune-related
FCAR	1.33661	-0.475629	31.0757	6.85277e-08	Nonimmune-related
LST1	1.3346	4.19085	116.488	2.8014e-22	Nonimmune-related
LCP2	1.33457	4.8685	178.887	1.21403e-30	NaturalKiller_Cell_Cytotoxicity	TCRsignalingPathway
IRF1	1.33444	5.12312	115.703	3.67111e-22	Antimicrobials
KLRB1	1.33374	-0.786049	43.3485	3.01393e-10	Nonimmune-related
NLRC4	1.33145	1.62896	144.734	3.06966e-26	Nonimmune-related
BATF2	1.33077	3.26379	62.5086	1.0646e-13	Nonimmune-related
PSMB9	1.33066	5.31332	103.737	2.21614e-20	Nonimmune-related
CYBA	1.32931	5.93355	144.652	3.1734e-26	Nonimmune-related
TNFAIP8L2	1.32769	3.07057	141.209	9.21492e-26	Nonimmune-related
CFAP206	1.32734	1.76548	27.6478	3.29711e-07	Nonimmune-related
RGS1	1.32585	6.73429	48.295	3.66383e-11	Nonimmune-related
CMPK2	1.32554	3.89042	59.8636	3.08735e-13	Nonimmune-related
PTAFR	1.32496	4.70706	111.012	1.79829e-21	Chemokine_Receptors	Cytokine_Receptors
TNFAIP2	1.32434	5.39584	61.5651	1.55597e-13	Nonimmune-related
GMFG	1.32293	4.30689	130.638	2.65518e-24	Cytokines
ABCA13	1.31658	1.79164	18.8378	2.1244e-05	Nonimmune-related
DNAJC5B	1.31653	-1.37638	34.6503	1.36862e-08	Nonimmune-related
APOBEC3G	1.31123	3.85011	117.096	2.27936e-22	Antimicrobials
AC073612.1	1.3081	-1.79235	10.9765	0.00107012	Nonimmune-related
IL18RAP	1.30622	-1.04591	38.3034	2.70881e-09	Cytokine_Receptors	Interleukins_Receptor
PLBD1	1.30474	3.27701	79.275	1.57477e-16	Nonimmune-related
CTSZ	1.30456	7.01508	120.076	8.49233e-23	Nonimmune-related
TNFRSF1B	1.30383	5.57549	133.723	9.9221e-25	Cytokine_Receptors	TNF_Family_Members_Receptors
CP	1.30267	6.12024	28.9574	1.80437e-07	Nonimmune-related
MAP3K7CL	1.30234	3.92385	47.5845	4.94744e-11	Nonimmune-related
SQOR	1.29956	4.52445	169.923	1.59579e-29	Nonimmune-related
MEFV	1.29881	-0.449221	73.0087	1.71952e-15	Nonimmune-related
ANO9	1.29703	-1.44803	30.8314	7.65799e-08	Nonimmune-related
GNGT2	1.29471	1.18146	136.196	4.47864e-25	Nonimmune-related
BTK	1.29468	3.61414	153.227	2.26748e-27	BCRSignalingPathway
DCN	1.29444	7.59901	29.1901	1.62172e-07	Nonimmune-related
IGSF6	1.29328	4.03141	96.484	2.85368e-19	Nonimmune-related
CD163L1	1.29231	0.892796	39.6349	1.51055e-09	Nonimmune-related
MPEG1	1.29177	3.8641	56.9469	1.00935e-12	Nonimmune-related
ARHGAP30	1.29165	4.40055	128.664	5.03054e-24	Nonimmune-related
WDR38	1.28968	1.98806	11.493	0.000820716	Nonimmune-related
SP140	1.2893	1.42659	121.792	4.77137e-23	Nonimmune-related
ANXA2	1.28888	8.56662	63.8642	6.2063e-14	Nonimmune-related
ASCL2	1.28877	-0.0839374	114.142	6.1661e-22	Nonimmune-related
NFAM1	1.28831	3.81665	106.905	7.324e-21	Nonimmune-related
C3orf52	1.28716	-0.250315	31.9143	4.6851e-08	Nonimmune-related
CD5L	1.28715	-0.78475	15.1246	0.000131416	Nonimmune-related
CCRL2	1.28711	1.95923	122.008	4.44285e-23	Chemokine_Receptors	Chemokine_Receptors	Cytokine_Receptors
SLC34A2	1.28591	1.20556	21.7373	5.27304e-06	Nonimmune-related
PDCD1	1.28277	-0.770355	44.1178	2.165e-10	Antimicrobials	TCRsignalingPathway
ERP27	1.28275	0.703994	31.5774	5.45756e-08	Nonimmune-related
CD84	1.28115	4.60822	81.4973	6.86037e-17	Nonimmune-related
C3AR1	1.28074	5.25919	107.773	5.46761e-21	Cytokine_Receptors
SLA	1.27556	5.43701	98.5614	1.3682e-19	Nonimmune-related
CLEC4A	1.2727	1.60572	111.167	1.69387e-21	Nonimmune-related
CD69	1.27156	1.99481	56.6991	1.11402e-12	Nonimmune-related
IFI6	1.27024	7.9741	40.0349	1.27007e-09	Nonimmune-related
SH2D1A	1.26904	-0.929036	43.2646	3.12482e-10	NaturalKiller_Cell_Cytotoxicity
KCNE1	1.26851	-1.03255	28.6907	2.03784e-07	Nonimmune-related
SLA2	1.2681	-0.199831	94.3261	6.16636e-19	Nonimmune-related
GABRE	1.26804	2.77296	13.6384	0.000276268	Nonimmune-related
SIGLEC14	1.26772	2.97436	49.3596	2.33748e-11	Nonimmune-related
C2orf91	1.26593	-1.43298	24.7523	1.26767e-06	Nonimmune-related
HPGDS	1.2648	2.71833	86.5872	1.03039e-17	Nonimmune-related
TGFBI	1.26465	7.4768	26.1848	6.49721e-07	Nonimmune-related
S100Z	1.26332	-1.25663	82.2171	5.21564e-17	Antimicrobials
OCIAD2	1.26095	5.71043	43.5226	2.80087e-10	Nonimmune-related
SIGLEC11	1.26053	0.907959	60.5316	2.35113e-13	Nonimmune-related
ADORA3	1.25962	5.11798	101.579	4.71787e-20	Nonimmune-related
CD72	1.25936	1.82172	53.9813	3.40312e-12	BCRSignalingPathway
CLEC4E	1.2586	1.69306	25.9291	7.31719e-07	Nonimmune-related
TMEM106A	1.25701	2.6187	139.782	1.44223e-25	Nonimmune-related
PYCARD	1.2563	3.74478	126.318	1.07808e-23	Nonimmune-related
ZNF683	1.25483	-1.53019	30.4272	9.20542e-08	Nonimmune-related
IL15RA	1.25313	1.64558	121.601	5.08259e-23	Cytokine_Receptors	Interleukins_Receptor
IER3	1.2528	4.08574	47.2224	5.76786e-11	Nonimmune-related
ADAP2	1.25061	4.44946	174.675	4.04318e-30	Nonimmune-related
PARVG	1.24931	4.60141	129.977	3.28779e-24	Nonimmune-related
ABI3	1.24912	4.48449	145.064	2.77141e-26	Nonimmune-related
MS4A14	1.24889	1.50234	68.1017	1.15922e-14	Nonimmune-related
ITGAM	1.24764	4.44676	112.973	9.18397e-22	Nonimmune-related
PTCRA	1.24707	-0.459585	30.6899	8.16731e-08	Nonimmune-related
HLA-F	1.24694	5.30724	86.9907	8.92843e-18	Antigen_Processing_and_Presentation
FOSL1	1.24599	3.01495	36.2179	6.81608e-09	Nonimmune-related
SP100	1.24372	5.19416	161.949	1.65743e-28	Nonimmune-related
CEACAM21	1.24359	0.937279	72.0991	2.44324e-15	Nonimmune-related
CLDN7	1.24288	0.446111	83.0296	3.85107e-17	Nonimmune-related
HLA-C	1.24284	9.3541	69.5046	6.71975e-15	Antigen_Processing_and_Presentation	NaturalKiller_Cell_Cytotoxicity
BIN2	1.24149	3.6267	149.17	7.81418e-27	Nonimmune-related
IFITM1	1.24021	5.72181	47.8617	4.40003e-11	BCRSignalingPathway
APOBEC3C	1.23264	5.12444	91.2885	1.85745e-18	Antimicrobials
C1RL	1.23215	5.11077	85.8759	1.34647e-17	Nonimmune-related
ARHGAP9	1.23117	3.43485	190.279	4.98475e-32	Nonimmune-related
ST8SIA4	1.22822	4.49047	91.0042	2.05783e-18	Nonimmune-related
C5AR2	1.22769	1.53858	60.1168	2.77926e-13	Chemokine_Receptors	Cytokine_Receptors
ARPC1B	1.22749	6.53546	142.566	6.04335e-26	Nonimmune-related
PLB1	1.22723	3.01167	124.435	1.99726e-23	Nonimmune-related
IL1A	1.226	0.660634	37.6799	3.56497e-09	Antimicrobials	Cytokines	Interleukins
ARHGAP15	1.22518	2.79681	130.58	2.70297e-24	Nonimmune-related
CFH	1.22473	5.56659	37.3575	4.11542e-09	Nonimmune-related
PTGER4	1.22449	2.46816	51.3583	1.011e-11	Cytokine_Receptors
LSP1	1.22435	4.90613	72.6852	1.95582e-15	Nonimmune-related
STEAP4	1.22343	1.01802	21.03	7.39039e-06	Nonimmune-related
CILP	1.2233	1.57702	14.4564	0.000183342	Nonimmune-related
EVI2B	1.22236	4.57787	100.137	7.82072e-20	Nonimmune-related
ANKRD22	1.2218	2.35208	40.8964	8.7125e-10	Nonimmune-related
FRRS1	1.21957	0.411213	60.9644	1.97507e-13	Nonimmune-related
PDZK1IP1	1.21474	0.654632	20.5543	9.28226e-06	Nonimmune-related
PLSCR1	1.21414	5.75999	118.667	1.35589e-22	Antimicrobials
ANXA1	1.21249	8.2687	49.6565	2.0654e-11	Nonimmune-related
RASGRP4	1.21226	2.18168	117.663	1.88502e-22	Nonimmune-related
CSF3R	1.21188	4.79803	105.296	1.28479e-20	Cytokine_Receptors
ARHGDIB	1.21136	6.90714	162.79	1.29212e-28	Nonimmune-related
SBSPON	1.21065	2.7447	16.0449	8.32945e-05	Nonimmune-related
LTB	1.20866	0.206187	56.8642	1.04132e-12	Cytokines
BST2	1.20866	6.648	51.0394	1.15747e-11	Antimicrobials
LAT2	1.2085	4.98182	146.062	2.03452e-26	Nonimmune-related
SPINT1	1.20751	1.72161	64.9449	4.02646e-14	Nonimmune-related
SERPINB1	1.20726	5.18846	147.901	1.1538e-26	Nonimmune-related
INMT	1.20713	2.21644	22.9222	3.00369e-06	Nonimmune-related
LGALS9	1.20699	6.08785	134.461	7.8099e-25	Nonimmune-related
HCLS1	1.20684	6.12552	115.062	4.5459e-22	Nonimmune-related
ZMYND10	1.20668	4.2249	18.5225	2.47559e-05	Nonimmune-related
MX2	1.20637	3.89782	37.1392	4.53208e-09	Antimicrobials
WAS	1.20591	4.06476	135.623	5.37312e-25	Nonimmune-related
THEMIS2	1.20577	4.95176	90.3591	2.60358e-18	Nonimmune-related
P2RY6	1.20543	1.81836	55.2696	2.00154e-12	Nonimmune-related
TEC	1.20524	-0.815274	62.6147	1.01865e-13	TCRsignalingPathway
TPRG1	1.20366	0.42395	89.4682	3.58234e-18	Nonimmune-related
MYO1F	1.20276	5.06416	136.025	4.73072e-25	Nonimmune-related
STAC3	1.19816	2.18057	146.489	1.78332e-26	Nonimmune-related
PIK3R5	1.19802	3.89043	100.246	7.49143e-20	BCRSignalingPathway	NaturalKiller_Cell_Cytotoxicity	TCRsignalingPathway
IKZF3	1.19787	0.679056	33.3086	2.49761e-08	Nonimmune-related
SLC15A3	1.19692	5.11327	125.369	1.47352e-23	Nonimmune-related
MOCOS	1.19422	1.09593	34.2992	1.6014e-08	Nonimmune-related
HPSE	1.19307	3.25335	59.9337	2.99351e-13	Nonimmune-related
DOCK2	1.1927	4.62017	92.2143	1.32637e-18	Nonimmune-related
MMP9	1.19251	5.26237	9.84891	0.00191923	Antimicrobials
TMEM37	1.19217	2.50845	66.223	2.42806e-14	Nonimmune-related
OAS3	1.19069	6.34482	48.3063	3.64642e-11	Nonimmune-related
MSLN	1.18982	1.24538	20.263	1.06763e-05	Nonimmune-related
TNFRSF8	1.18859	0.0199677	22.7317	3.28585e-06	Cytokine_Receptors	TNF_Family_Members_Receptors
LILRA2	1.18782	3.27833	80.6444	9.40275e-17	Nonimmune-related
KRT7	1.18778	0.494895	29.0706	1.71169e-07	Nonimmune-related
GAL	1.18628	0.821692	12.8099	0.000419655	Cytokines
LYN	1.18601	5.47951	173.954	4.97551e-30	BCRSignalingPathway
GPNMB	1.18539	6.99949	40.5253	1.02549e-09	Nonimmune-related
COL10A1	1.18474	-0.319485	10.7048	0.00123107	Nonimmune-related
POSTN	1.18181	7.58736	7.6206	0.00623109	Nonimmune-related
IL11	1.17929	0.582208	19.1165	1.85588e-05	Cytokines	Interleukins
IKZF1	1.17715	3.78779	85.2107	1.71302e-17	Nonimmune-related
GPSM3	1.17686	4.72726	157.709	5.86887e-28	Nonimmune-related
LCTL	1.17683	2.18987	57.2678	8.83135e-13	Nonimmune-related
ATP8B4	1.17661	2.84408	97.1466	2.24774e-19	Nonimmune-related
SP140L	1.1761	3.52165	96.5029	2.82771e-19	Nonimmune-related
IFI35	1.17545	5.19701	106.153	9.54443e-21	Nonimmune-related
LILRB4	1.1736	5.4677	85.3498	1.63542e-17	Nonimmune-related
ZNF474	1.17217	0.605559	19.9901	1.21729e-05	Nonimmune-related
CD37	1.17047	4.9015	97.8594	1.75195e-19	Nonimmune-related
CYP1B1	1.16982	4.62779	17.1418	4.85574e-05	Nonimmune-related
GPR132	1.1695	1.77941	92.0854	1.38362e-18	Nonimmune-related
CAVIN3	1.16758	2.63694	36.1584	6.99397e-09	Nonimmune-related
MICB	1.16757	2.05992	64.0012	5.85822e-14	Antigen_Processing_and_Presentation	NaturalKiller_Cell_Cytotoxicity
B2M	1.1675	11.0168	119.79	9.26909e-23	Antigen_Processing_and_Presentation	Antimicrobials
HTR1D	1.16728	0.495467	23.0987	2.76179e-06	Nonimmune-related
CHRDL2	1.16711	0.795723	13.277	0.000331424	Nonimmune-related
TNFSF15	1.16489	-0.607767	41.6077	6.39609e-10	Cytokines	TNF_Family_Members
HMCN2	1.16479	1.52056	12.2503	0.000557509	Nonimmune-related
APOBEC3D	1.16379	0.72051	81.5688	6.64731e-17	Nonimmune-related
HSPA6	1.16202	4.29831	27.0416	4.36478e-07	Antigen_Processing_and_Presentation
RGS2	1.16147	5.76295	38.6724	2.30633e-09	Nonimmune-related
CPZ	1.16146	2.26903	13.5879	0.000283376	Nonimmune-related
BCL3	1.15823	4.09988	62.9572	8.91068e-14	Antimicrobials
SOWAHD	1.1569	0.277457	77.6171	2.94958e-16	Nonimmune-related
SYK	1.15664	4.90307	106.572	8.23828e-21	BCRSignalingPathway	NaturalKiller_Cell_Cytotoxicity
CHODL	1.15662	3.38332	11.7986	0.000701894	Nonimmune-related
APBB1IP	1.15591	5.24734	93.5037	8.33514e-19	Nonimmune-related
TRAF3IP3	1.15484	2.15099	99.0893	1.12749e-19	Nonimmune-related
LGALS3	1.15347	7.31274	36.7413	5.40457e-09	Nonimmune-related
GPR34	1.15208	5.41004	67.7219	1.35029e-14	Nonimmune-related
BST1	1.15112	2.06101	67.9978	1.20743e-14	Nonimmune-related
RAB42	1.14985	2.76285	52.9897	5.12969e-12	Nonimmune-related
XAF1	1.14791	5.51687	36.2846	6.6173e-09	Nonimmune-related
GIMAP2	1.14736	3.65945	117.367	2.0818e-22	Nonimmune-related
SLC16A3	1.14339	5.5544	51.058	1.14849e-11	Nonimmune-related
SLC37A2	1.14309	3.89684	61.0099	1.94376e-13	Nonimmune-related
FN1	1.14255	10.1518	40.9523	8.51537e-10	Nonimmune-related
MCUB	1.14246	5.09262	73.143	1.63926e-15	Nonimmune-related
LPAR5	1.14203	4.31574	93.8181	7.41214e-19	Nonimmune-related
STEAP3	1.14182	6.4364	60.8776	2.05126e-13	Nonimmune-related
SAT1	1.14087	8.24386	92.9697	1.00705e-18	Nonimmune-related
GIMAP4	1.14073	4.82432	144.728	3.07562e-26	Nonimmune-related
TLR6	1.14065	2.21502	85.9376	1.30937e-17	Nonimmune-related
CFAP157	1.1403	1.94329	17.0266	5.13793e-05	Nonimmune-related
TRIM22	1.13951	6.29548	79.3511	1.53717e-16	Antimicrobials
IFIT3	1.13946	6.00633	52.3379	6.73879e-12	Nonimmune-related
GDF5	1.1394	0.781715	17.9314	3.30037e-05	Cytokines	TGFb_Family_Member
LILRA1	1.13786	1.94596	77.6484	2.91474e-16	Nonimmune-related
GLIPR1	1.13757	5.63706	58.0027	6.56417e-13	Nonimmune-related
MYLK3	1.13513	0.38545	16.0391	8.35297e-05	Nonimmune-related
SLC2A5	1.13395	5.95376	79.33	1.54946e-16	Nonimmune-related
SLC17A9	1.13358	1.87221	82.7561	4.26471e-17	Nonimmune-related
TBXAS1	1.13317	4.90412	108.264	4.59065e-21	Nonimmune-related
KCNK13	1.13212	1.98689	83.7474	2.94798e-17	Nonimmune-related
COL6A2	1.13054	7.9362	15.2629	0.000122688	Nonimmune-related
TMC8	1.12879	3.27617	106.657	7.97815e-21	Nonimmune-related
S100P	1.1287	-1.08058	26.1931	6.46771e-07	Antimicrobials
CD6	1.12816	0.873026	52.6776	5.83865e-12	Nonimmune-related
EPHX3	1.12766	-0.181978	27.3391	3.80051e-07	Nonimmune-related
TCTEX1D1	1.12459	3.82333	12.6865	0.00044674	Nonimmune-related
TRIM38	1.12444	3.86496	113.046	8.93872e-22	Nonimmune-related
APOC2	1.12335	3.36471	31.4364	5.82308e-08	Nonimmune-related
IL12RB1	1.1219	1.57705	103.623	2.29021e-20	Cytokine_Receptors	Interleukins_Receptor
PARP9	1.11893	6.21845	124.173	2.18062e-23	Nonimmune-related
RSPH4A	1.11836	2.73363	17.0413	5.10107e-05	Nonimmune-related
EOMES	1.11826	-1.17087	24.3754	1.51291e-06	Nonimmune-related
TAP1	1.11816	7.03412	60.1355	2.76632e-13	Antigen_Processing_and_Presentation
CPA4	1.11788	0.815148	16.8425	5.62334e-05	Nonimmune-related
RAB27A	1.11785	3.43495	92.0171	1.41826e-18	Nonimmune-related
CXCL2	1.1173	2.42531	24.2626	1.59617e-06	Antimicrobials	Chemokines	Cytokines
PLP2	1.11532	5.89785	49.1624	2.5421e-11	Nonimmune-related
TLR10	1.11508	1.98856	50.0617	1.73881e-11	Nonimmune-related
C21orf62	1.11462	5.53972	34.442	1.50386e-08	Nonimmune-related
AIM2	1.11363	0.196614	20.8558	8.03094e-06	Nonimmune-related
CPVL	1.11345	5.9302	49.8811	1.87957e-11	Nonimmune-related
CACNA2D4	1.11343	2.08708	58.7783	4.77718e-13	Nonimmune-related
STXBP2	1.11119	4.12855	128.106	6.02088e-24	Nonimmune-related
TMEM52B	1.10954	1.72638	75.8565	5.76559e-16	Nonimmune-related
TAGLN	1.10878	7.21496	27.9379	2.8842e-07	Nonimmune-related
CRYBB1	1.10864	1.0674	67.5905	1.41682e-14	Nonimmune-related
TNFRSF18	1.10839	-0.430279	28.4906	2.23432e-07	Cytokine_Receptors	TNF_Family_Members_Receptors
JAK3	1.10831	3.34271	47.059	6.17553e-11	Nonimmune-related
DCDC2	1.1081	1.83613	21.2751	6.57326e-06	Nonimmune-related
SLFN12	1.10744	1.92574	59.8994	3.03431e-13	Nonimmune-related
PLAU	1.10578	5.26692	24.5475	1.39631e-06	Antimicrobials	Chemokines	Cytokines
APOBR	1.10479	3.43136	74.238	1.07149e-15	Nonimmune-related
SCUBE2	1.10346	5.11545	21.4809	5.95892e-06	Nonimmune-related
IFI16	1.10157	6.80582	77.6949	2.87634e-16	Nonimmune-related
SLC10A6	1.10099	-1.28153	22.3233	3.98808e-06	Nonimmune-related
IL18R1	1.09956	0.0259248	30.5647	8.64639e-08	Cytokine_Receptors	Interleukins_Receptor
CA4	1.09945	4.2384	8.94946	0.0030747	Nonimmune-related
EFEMP1	1.09868	8.31857	31.8969	4.72671e-08	Nonimmune-related
CAPG	1.098	6.89759	109.251	3.27082e-21	Nonimmune-related
DTX3L	1.09498	5.74005	116.542	2.75094e-22	Nonimmune-related
MT1H	1.09476	0.323117	14.6408	0.000167216	Nonimmune-related
SPN	1.09068	2.51488	69.0616	7.96003e-15	Nonimmune-related
LDLRAD2	1.09012	0.795328	15.6152	0.000103013	Nonimmune-related
NAT1	1.08987	1.37127	85.1253	1.76799e-17	Nonimmune-related
P2RY8	1.08787	1.33002	34.3412	1.57153e-08	Nonimmune-related
CFAP52	1.08652	2.69733	10.5721	0.00131849	Nonimmune-related
GPBAR1	1.08646	-0.910965	57.3003	8.71513e-13	Nonimmune-related
FOXJ1	1.08594	5.68013	16.8975	5.47383e-05	Nonimmune-related
CSF1R	1.08435	7.45664	75.9951	5.49178e-16	Cytokine_Receptors
NPC2	1.08416	7.49997	105.428	1.22258e-20	Nonimmune-related
NMI	1.08416	4.00629	114.423	5.60712e-22	Nonimmune-related
OR51E1	1.08182	0.612876	11.8576	0.000681086	Nonimmune-related
CD226	1.08057	1.57425	59.557	3.48475e-13	Nonimmune-related
KCNE3	1.08043	3.30245	56.6597	1.13209e-12	Nonimmune-related
ITGA5	1.07913	6.17868	56.3188	1.30485e-12	Nonimmune-related
TRIM34	1.07861	3.03999	112.68	1.01198e-21	Nonimmune-related
CYP2S1	1.07786	1.50818	97.8041	1.77885e-19	Nonimmune-related
PLIN2	1.07731	5.72505	41.8546	5.7556e-10	Nonimmune-related
CAPN12	1.07545	-1.17424	15.7427	9.66972e-05	Nonimmune-related
FMO3	1.07394	0.656975	30.4825	8.97606e-08	Nonimmune-related
PTGS1	1.07376	5.54454	47.963	4.2156e-11	Nonimmune-related
TFPI2	1.07365	1.97738	8.15505	0.00468285	Nonimmune-related
MLKL	1.07307	2.31537	133.478	1.06523e-24	Nonimmune-related
ISG20	1.07241	3.02923	77.3532	3.26041e-16	Antimicrobials
TBC1D10C	1.07206	1.37371	84.461	2.26153e-17	Nonimmune-related
VAMP5	1.06971	5.81802	66.6452	2.0625e-14	Nonimmune-related
PCED1B	1.06905	2.48771	112.453	1.09333e-21	Nonimmune-related
OLR1	1.06889	5.41788	45.0777	1.43742e-10	Antimicrobials
TCIM	1.06839	5.19091	27.3467	3.78988e-07	Nonimmune-related
SLN	1.06629	3.33534	8.93582	0.00309688	Nonimmune-related
GLRX	1.06492	5.26352	83.6475	3.07177e-17	Nonimmune-related
CX3CR1	1.06483	6.21371	33.3728	2.42912e-08	Chemokine_Receptors	Cytokine_Receptors
OLFML3	1.06474	6.13038	80.3819	1.04263e-16	Nonimmune-related
C11orf21	1.06387	-0.0534271	41.2276	7.54369e-10	Nonimmune-related
APOL6	1.06278	5.5272	66.303	2.36055e-14	Nonimmune-related
TNFRSF11B	1.06275	3.24084	35.6153	8.90784e-09	Cytokines	TNF_Family_Members
CD44	1.06261	9.03997	44.4968	1.84329e-10	Nonimmune-related
TUBA1C	1.05979	7.21653	48.7555	3.01712e-11	Nonimmune-related
PSMB8	1.0582	6.24008	85.6805	1.44634e-17	Antigen_Processing_and_Presentation
FNDC7	1.05819	0.440437	12.8989	0.000401168	Nonimmune-related
SLC47A2	1.05818	4.07462	17.4369	4.20238e-05	Nonimmune-related
CTSB	1.05816	10.0967	101.251	5.25769e-20	Antigen_Processing_and_Presentation
HLA-DOB	1.05802	0.261357	45.8732	1.02167e-10	Antigen_Processing_and_Presentation
PTPRCAP	1.05633	1.28454	37.3349	4.15156e-09	Nonimmune-related
WDR63	1.05572	1.48635	12.1502	0.00058665	Nonimmune-related
PSPH	1.05552	6.22642	23.7258	2.05494e-06	Nonimmune-related
IRF8	1.05492	4.15564	64.0324	5.7981e-14	Nonimmune-related
LEFTY2	1.05458	2.67472	14.117	0.000217271	Cytokines	TGFb_Family_Member
CLIC1	1.0538	7.60842	77.1118	3.58486e-16	Nonimmune-related
CASP8	1.05295	3.47477	133.942	9.18438e-25	Nonimmune-related
CXCL5	1.05252	2.17634	11.1087	0.000999691	Antimicrobials	Chemokines	Cytokines
PILRA	1.05246	3.568	94.8928	5.03094e-19	Nonimmune-related
DRC1	1.05042	2.69384	10.8608	0.00113585	Nonimmune-related
KCNQ1	1.04867	3.45798	107.268	6.4595e-21	Nonimmune-related
STX11	1.04825	1.29774	79.6637	1.36001e-16	Nonimmune-related
LTBP2	1.04746	4.61419	33.1353	2.70295e-08	Cytokines
BLNK	1.04629	2.96249	58.4383	5.48407e-13	BCRSignalingPathway
MGP	1.0457	6.73005	17.7967	3.52489e-05	Nonimmune-related
TNFRSF11A	1.04535	2.33202	54.9472	2.28531e-12	Cytokine_Receptors	TNF_Family_Members_Receptors
BTN3A2	1.04519	5.98378	65.9654	2.69716e-14	Nonimmune-related
LY75	1.04459	3.02681	52.6539	5.89636e-12	Nonimmune-related
PTPN6	1.04379	4.7043	110.511	2.11962e-21	BCRSignalingPathway	TCRsignalingPathway	NaturalKiller_Cell_Cytotoxicity
TAGAP	1.04309	3.07509	57.7911	7.13508e-13	Nonimmune-related
PLA2R1	1.04237	2.30949	17.837	3.45637e-05	Nonimmune-related
APOBEC3F	1.04199	1.88608	85.1557	1.74823e-17	Antimicrobials
DENND1C	1.04118	2.48098	109.648	2.84872e-21	Nonimmune-related
CD274	1.03813	2.76177	34.096	1.75435e-08	Nonimmune-related
TRIM21	1.03788	4.16728	157.23	6.77555e-28	Nonimmune-related
LTC4S	1.03758	1.77331	50.6716	1.34687e-11	Nonimmune-related
ALOX15B	1.03615	2.66652	12.172	0.00058019	Nonimmune-related
SUSD3	1.03534	2.58007	57.4973	8.0424e-13	Nonimmune-related
HFE	1.03517	3.4439	88.1414	5.8203e-18	Antigen_Processing_and_Presentation	Antimicrobials
HBB	1.03406	8.15219	14.2651	0.000201742	Nonimmune-related
SERPINA3	1.03265	8.51483	23.8329	1.95383e-06	Antimicrobials
NABP1	1.03243	3.00217	48.0721	4.01766e-11	Nonimmune-related
EFCAB10	1.03051	1.03051	14.845	0.000151026	Nonimmune-related
HAS3	1.02987	2.2779	32.0141	4.47813e-08	Nonimmune-related
TLR5	1.02921	2.6425	68.6795	9.24363e-15	Nonimmune-related
SVOPL	1.02678	-0.278097	12.5691	0.000474126	Nonimmune-related
CATIP	1.02672	0.42263	12.4596	0.000501252	Nonimmune-related
IL13RA2	1.0256	4.4218	13.2817	0.000330641	Cytokine_Receptors	Interleukins_Receptor
RBM47	1.02512	3.87379	43.9377	2.34301e-10	Nonimmune-related
PLCB2	1.02422	4.92377	76.5125	4.50271e-16	Nonimmune-related
CA12	1.02398	6.21549	19.9638	1.233e-05	Nonimmune-related
ADAMTS14	1.02369	3.03737	17.8956	3.35888e-05	Nonimmune-related
SH2D2A	1.02337	0.220579	33.9818	1.84608e-08	Nonimmune-related
TES	1.02201	2.97231	69.3184	7.20031e-15	Nonimmune-related
SAMD9L	1.02192	5.64642	47.9934	4.16173e-11	Nonimmune-related
ZC3H12D	1.02154	1.03455	85.0956	1.78753e-17	Nonimmune-related
LILRA4	1.0211	2.67571	11.7662	0.000713612	Nonimmune-related
AL049839.2	1.02093	9.83523	23.5522	2.23024e-06	Nonimmune-related
FBXO39	1.01756	-0.0984834	24.6366	1.33832e-06	Nonimmune-related
RIBC2	1.0154	0.460124	10.7535	0.00120051	Nonimmune-related
DIRAS3	1.01428	4.76748	36.0438	7.36399e-09	Nonimmune-related
PSTPIP2	1.01384	1.9503	48.1958	3.81318e-11	Nonimmune-related
TCIRG1	1.01368	5.00452	75.5983	6.38194e-16	Nonimmune-related
OSMR	1.01252	6.07687	46.0745	9.39361e-11	Cytokine_Receptors
PATL2	1.0123	0.00692251	39.7832	1.41566e-09	Nonimmune-related
CCN4	1.01206	3.97983	11.732	0.00072622	Nonimmune-related
CASS4	1.01121	1.91659	58.9764	4.40833e-13	Nonimmune-related
CD93	1.01108	5.95292	35.4872	9.43243e-09	Nonimmune-related
TREML1	1.01084	0.819247	57.0651	9.59278e-13	Nonimmune-related
C19orf84	1.01023	-1.03082	24.2604	1.59694e-06	Nonimmune-related
EBI3	1.00982	2.47228	63.0329	8.61846e-14	Cytokines
RIPOR3	1.00914	3.14044	31.9609	4.59053e-08	Nonimmune-related
PXDNL	1.00876	1.57419	19.1632	1.81418e-05	Nonimmune-related
DEF6	1.00756	3.61729	93.9497	7.06003e-19	Nonimmune-related
IFIT1	1.00751	5.89688	26.4283	5.80163e-07	Nonimmune-related
ESM1	1.00461	3.29938	9.91799	0.00185137	Cytokines
CRYBG1	1.00432	3.19781	22.133	4.36768e-06	Nonimmune-related
IKBKE	1.0043	3.12447	97.6172	1.90107e-19	Antimicrobials
MREG	1.00355	4.75756	37.363	4.10546e-09	Nonimmune-related
PARP14	1.0028	6.13385	71.1081	3.60065e-15	Nonimmune-related
PIK3R6	1.00238	1.73925	62.6501	1.00433e-13	Nonimmune-related
CEBPA	1.00179	4.93357	71.972	2.57349e-15	Nonimmune-related
SEC61A2	-1.00023	4.47021	89.8531	3.11691e-18	Nonimmune-related
SORCS1	-1.00132	3.43081	18.1383	2.98424e-05	Nonimmune-related
ADAMTS8	-1.00139	2.65041	32.9621	2.92016e-08	Nonimmune-related
SMIM18	-1.00229	0.529994	12.8342	0.000414531	Nonimmune-related
MAST3	-1.00234	5.43528	49.0908	2.61983e-11	Nonimmune-related
TEF	-1.00357	5.25028	59.4558	3.6407e-13	Nonimmune-related
VSTM5	-1.00462	0.109102	25.945	7.25981e-07	Nonimmune-related
MEX3B	-1.0065	2.79221	29.4223	1.4579e-07	Nonimmune-related
CACNA1A	-1.00805	4.24933	33.1752	2.65486e-08	Nonimmune-related
SGCD	-1.00994	3.28827	13.9166	0.000240243	Nonimmune-related
GSX1	-1.01	2.49781	10.7095	0.00122806	Nonimmune-related
KCNMB2	-1.01211	1.56441	30.3054	9.73088e-08	Nonimmune-related
PRKCQ	-1.01253	2.27088	31.8485	4.82701e-08	TCRsignalingPathway
INPP5F	-1.01271	5.53504	51.0091	1.17218e-11	Nonimmune-related
CELSR3	-1.0136	4.63947	32.2026	4.11637e-08	Nonimmune-related
TBX1	-1.01486	0.842868	12.3376	0.000533311	Nonimmune-related
TMCC2	-1.01538	4.7471	46.9884	6.36947e-11	Nonimmune-related
PCK1	-1.01569	-0.845457	11.6309	0.000764775	Nonimmune-related
NBEA	-1.017	4.71985	60.7839	2.13013e-13	Nonimmune-related
NPY	-1.01758	2.99491	12.2311	0.000562988	Cytokines
BAAT	-1.01824	-1.46993	41.4203	6.93795e-10	Nonimmune-related
TPD52L1	-1.01953	4.62112	24.6197	1.34979e-06	Nonimmune-related
PDE1B	-1.02125	3.86355	32.7179	3.26207e-08	Nonimmune-related
SEPTIN3	-1.02143	7.25509	47.3469	5.4712e-11	Nonimmune-related
FAM171A2	-1.02176	4.03376	68.5167	9.87228e-15	Nonimmune-related
FNDC9	-1.02254	1.60008	15.14	0.000130413	Nonimmune-related
MACROH2A2	-1.0236	3.40363	28.4924	2.23412e-07	Nonimmune-related
ZNF831	-1.02402	-0.542844	17.8161	3.49089e-05	Nonimmune-related
DGKI	-1.02404	3.97533	44.2464	2.05217e-10	Nonimmune-related
EEF1A2	-1.02439	7.07961	28.5259	2.20003e-07	Nonimmune-related
UPP2	-1.02466	-0.587185	29.1841	1.62485e-07	Nonimmune-related
DUOX1	-1.02468	1.40633	28.7788	1.95699e-07	Antimicrobials
CAMK2B	-1.02484	6.08713	30.2876	9.81857e-08	Nonimmune-related
SLC2A13	-1.02501	4.46386	54.4702	2.78819e-12	Nonimmune-related
ANKRD20A2	-1.02522	0.217447	18.5253	2.4716e-05	Nonimmune-related
GPR17	-1.0253	5.85142	7.57567	0.00638319	Chemokine_Receptors	Cytokine_Receptors
TRPV4	-1.02656	1.30886	17.5167	4.04141e-05	Nonimmune-related
ITPKA	-1.02705	3.06078	39.7782	1.41991e-09	Nonimmune-related
TUBA4A	-1.02785	5.40111	33.9573	1.86842e-08	Nonimmune-related
SLC1A2	-1.02812	9.42317	27.1084	4.23184e-07	Nonimmune-related
PDE10A	-1.0287	2.63707	28.0336	2.75946e-07	Nonimmune-related
CDHR1	-1.02881	3.55654	31.8921	4.7368e-08	Nonimmune-related
FBLL1	-1.02889	2.84722	23.6443	2.13547e-06	Nonimmune-related
DOK7	-1.02985	0.894729	20.7077	8.62239e-06	Nonimmune-related
SEMA3E	-1.03021	3.80532	12.8924	0.000402485	Chemokines	Cytokines
PANX2	-1.03037	2.67411	43.5727	2.73656e-10	Nonimmune-related
STAR	-1.03044	-0.267255	22.8298	3.13636e-06	Nonimmune-related
FOXD2	-1.03107	0.371114	18.0607	3.09856e-05	Nonimmune-related
CHRM4	-1.03218	-0.0673729	28.5072	2.21729e-07	Nonimmune-related
RNF103-CHMP3	-1.03222	-1.74115	17.7654	3.57807e-05	Nonimmune-related
RGR	-1.03228	1.62179	20.3357	1.03098e-05	Nonimmune-related
STRC	-1.03248	0.244045	39.0923	1.91565e-09	Nonimmune-related
CLSTN2	-1.03383	5.25733	25.8381	7.6357e-07	Nonimmune-related
SLC24A4	-1.03442	3.93218	16.316	7.28664e-05	Nonimmune-related
MTRES1	-1.03462	4.05247	56.5845	1.17048e-12	Nonimmune-related
TIAM2	-1.03482	4.0972	58.9208	4.52142e-13	Nonimmune-related
CNTN5	-1.03514	1.5938	19.8573	1.29782e-05	Nonimmune-related
PSD2	-1.03562	7.28901	23.5435	2.2395e-06	Nonimmune-related
TCF15	-1.03593	-1.23608	26.6794	5.15957e-07	Nonimmune-related
KIF21B	-1.03767	5.74909	40.4718	1.04968e-09	Nonimmune-related
EPOP	-1.03935	2.98245	57.5692	7.81014e-13	Nonimmune-related
ASPDH	-1.04109	1.37323	23.0475	2.82963e-06	Nonimmune-related
SLCO1A2	-1.04135	4.88393	19.6129	1.46023e-05	Nonimmune-related
MAGEL2	-1.04145	2.08128	29.2777	1.55687e-07	Nonimmune-related
SLC13A5	-1.04155	2.57255	10.2706	0.00154134	Nonimmune-related
SHC3	-1.04163	6.1289	53.6312	3.94225e-12	NaturalKiller_Cell_Cytotoxicity
HPN	-1.04312	1.19199	21.385	6.23612e-06	Nonimmune-related
KCNQ2	-1.04379	6.63685	24.7744	1.25536e-06	Nonimmune-related
GADD45G	-1.04414	4.94734	25.0634	1.09643e-06	Nonimmune-related
DLX1	-1.04508	3.24361	15.1939	0.000126963	Nonimmune-related
DOCK3	-1.04522	4.97401	44.5056	1.83629e-10	Nonimmune-related
VIPR1	-1.04619	1.98025	33.0208	2.84298e-08	Cytokine_Receptors
TMEM132B	-1.04638	5.89883	21.4282	6.11049e-06	Nonimmune-related
FGF12	-1.04748	4.71622	33.8509	1.95973e-08	Cytokines
TET1	-1.04945	1.32196	62.4775	1.07614e-13	Nonimmune-related
CADM2	-1.05046	6.54904	42.8876	3.68227e-10	Nonimmune-related
SYNPO2L	-1.05144	-0.953954	33.7578	2.0412e-08	Nonimmune-related
SEC14L5	-1.0523	3.51366	14.3569	0.000192691	Nonimmune-related
CBFA2T3	-1.05288	1.63313	48.4027	3.49415e-11	Nonimmune-related
ITPR1	-1.0535	5.04554	50.1945	1.64818e-11	Nonimmune-related
CSRNP3	-1.05374	4.42587	67.5674	1.43476e-14	Nonimmune-related
ADGRB1	-1.05434	6.40046	20.607	9.05197e-06	Nonimmune-related
UNC80	-1.05622	4.58523	50.5123	1.44281e-11	Nonimmune-related
RTN4RL2	-1.05665	3.14101	29.3488	1.50801e-07	Nonimmune-related
CILP2	-1.05719	-0.228625	16.7955	5.75444e-05	Nonimmune-related
PYGM	-1.05829	4.88819	16.0105	8.47222e-05	Nonimmune-related
PLCB4	-1.06029	2.72517	37.8295	3.33887e-09	Nonimmune-related
ONECUT2	-1.06034	1.73265	15.1683	0.000128588	Nonimmune-related
CRHBP	-1.06176	1.51758	18.9262	2.03523e-05	Nonimmune-related
CYFIP2	-1.06295	6.9165	82.2152	5.24446e-17	Nonimmune-related
FLRT2	-1.0654	4.37699	35.3363	1.00881e-08	Nonimmune-related
FRMPD1	-1.06543	1.33119	45.5706	1.16241e-10	Nonimmune-related
FAIM2	-1.06626	7.54149	47.239	5.72721e-11	Nonimmune-related
TOX3	-1.0665	3.40787	21.2106	6.77989e-06	Nonimmune-related
SPRN	-1.06685	3.14502	52.6523	5.90211e-12	Nonimmune-related
UNC79	-1.06693	3.5697	44.2422	2.05592e-10	Nonimmune-related
ZNF695	-1.06813	-0.721032	15.3042	0.000120191	Nonimmune-related
EPHA7	-1.06846	2.46068	16.2228	7.62943e-05	Nonimmune-related
C2CD4A	-1.06848	0.435039	9.78679	0.0019824	Nonimmune-related
PRSS3	-1.06863	1.46754	25.7805	7.83941e-07	Nonimmune-related
KIRREL3	-1.06952	3.86506	27.8882	2.95119e-07	Nonimmune-related
SLC6A1	-1.07028	7.00775	41.405	6.99477e-10	Nonimmune-related
SMIM10L2A	-1.07116	4.19015	50.684	1.34276e-11	Nonimmune-related
PLCXD3	-1.07229	2.81939	14.3008	0.000198173	Nonimmune-related
ENHO	-1.07327	6.09401	34.3834	1.54381e-08	Nonimmune-related
GLRA2	-1.07638	1.57754	14.5464	0.000175287	Nonimmune-related
PPFIA4	-1.07659	4.41071	49.2381	2.46237e-11	Nonimmune-related
GRIA2	-1.07682	6.24108	39.2561	1.78541e-09	Nonimmune-related
PEBP4	-1.07838	1.91742	22.283	4.06718e-06	Nonimmune-related
WASF1	-1.07862	5.53642	54.6327	2.60765e-12	Nonimmune-related
KRT5	-1.08145	0.767309	9.55979	0.00223193	Nonimmune-related
MMP17	-1.08184	3.64987	25.922	7.34272e-07	Nonimmune-related
ZCCHC12	-1.08219	3.21691	25.4688	9.07121e-07	Nonimmune-related
CSMD1	-1.08392	3.63915	41.0459	8.17576e-10	Nonimmune-related
SEPTIN5	-1.08401	6.81984	78.5587	2.07359e-16	Nonimmune-related
ABLIM2	-1.08502	3.6506	59.3494	3.79714e-13	Nonimmune-related
ATP2A1	-1.08581	0.746438	33.7449	2.0531e-08	Nonimmune-related
SLC25A27	-1.08619	3.3675	44.5988	1.76443e-10	Nonimmune-related
LRRTM4	-1.08651	2.67491	23.1829	2.65523e-06	Nonimmune-related
KCNH1	-1.08732	1.9546	17.3177	4.45484e-05	Nonimmune-related
ESYT3	-1.08752	0.716636	36.2457	6.72465e-09	Nonimmune-related
ELAVL3	-1.08768	5.93764	43.96	2.32067e-10	Nonimmune-related
SEMA6B	-1.08774	5.09274	48.8323	2.92109e-11	Chemokines	Cytokines
NT5C1A	-1.08948	-1.18264	15.0523	0.000136223	Nonimmune-related
TMPRSS9	-1.09032	0.774944	18.5007	2.50183e-05	Nonimmune-related
NCS1	-1.09162	7.06938	62.3596	1.13159e-13	Nonimmune-related
RIPPLY2	-1.09241	0.595623	27.2542	3.95278e-07	Nonimmune-related
CDK4	-1.09535	9.46592	13.6629	0.000272881	TCRsignalingPathway
RAPGEFL1	-1.09566	4.04019	74.4554	9.8853e-16	Nonimmune-related
HES7	-1.09622	-1.07977	28.4378	2.28923e-07	Nonimmune-related
NECAB1	-1.0982	4.68464	44.5207	1.82447e-10	Nonimmune-related
ZNF556	-1.0996	-0.564683	23.5859	2.19388e-06	Nonimmune-related
MGAT5B	-1.10007	4.42581	39.0939	1.91699e-09	Nonimmune-related
PEG3	-1.10078	6.2292	52.2603	6.95948e-12	Nonimmune-related
TSPYL5	-1.10101	3.70253	40.1278	1.21959e-09	Nonimmune-related
TRIM17	-1.10167	0.234804	36.1565	6.99605e-09	Nonimmune-related
ZNF488	-1.10183	4.18441	15.4711	0.000110646	Nonimmune-related
APBA1	-1.10261	5.04429	75.236	7.33957e-16	Nonimmune-related
LINGO1	-1.10265	6.29191	43.9849	2.296e-10	Nonimmune-related
CACNB1	-1.10277	4.53323	77.8298	2.73289e-16	Nonimmune-related
PPEF1	-1.10338	0.987373	25.8061	7.74579e-07	Nonimmune-related
ADRA2C	-1.10437	0.430857	25.0604	1.09733e-06	Nonimmune-related
SMIM17	-1.10513	-0.303815	56.4054	1.2562e-12	Nonimmune-related
KY	-1.10715	0.752202	18.8951	2.06602e-05	Nonimmune-related
NRXN1	-1.10951	6.23954	38.1304	2.92701e-09	Nonimmune-related
C20orf203	-1.1103	-0.790259	35.4244	9.68872e-09	Nonimmune-related
PIP4K2C	-1.11049	6.25569	38.6104	2.37003e-09	Nonimmune-related
ZNF365	-1.11061	4.30313	50.5842	1.40002e-11	Nonimmune-related
OR2H2	-1.11078	-1.46661	27.7069	3.2063e-07	Nonimmune-related
GRAMD1B	-1.11166	5.23253	59.6253	3.39948e-13	Nonimmune-related
STAT4	-1.1124	1.08825	28.7589	1.97503e-07	Nonimmune-related
ANXA8L1	-1.11244	-1.3305	15.5615	0.000105795	Nonimmune-related
TMEM266	-1.1141	0.724503	57.8011	7.10612e-13	Nonimmune-related
NALCN	-1.11427	4.35336	52.2567	6.97002e-12	Nonimmune-related
CNTN1	-1.11556	7.37445	36.6602	5.60225e-09	Nonimmune-related
SCG3	-1.11569	7.50438	40.7658	9.23518e-10	Nonimmune-related
KCNJ6	-1.11582	2.63178	21.909	4.85889e-06	Nonimmune-related
HIF3A	-1.11603	4.84473	24.3969	1.4986e-06	Nonimmune-related
LGR5	-1.11615	2.08866	19.8624	1.29472e-05	Cytokine_Receptors
SYT3	-1.11753	2.89552	48.8775	2.86145e-11	Nonimmune-related
GDF10	-1.11766	0.782122	15.3127	0.000119693	Cytokines	TGFb_Family_Member
KCNH8	-1.11871	2.56509	24.2953	1.57187e-06	Nonimmune-related
CHN1	-1.11871	7.03999	54.1075	3.23818e-12	Nonimmune-related
AMPH	-1.11913	4.74097	41.0349	8.21492e-10	Nonimmune-related
FBXO2	-1.11938	5.39036	26.4089	5.85423e-07	Nonimmune-related
KIAA1549L	-1.12157	5.0966	53.1324	4.84638e-12	Nonimmune-related
CA11	-1.12295	5.96978	45.39	1.25781e-10	Nonimmune-related
SLC9A3	-1.12378	-1.32324	24.0691	1.74727e-06	Nonimmune-related
TNK1	-1.12589	-0.198331	43.1947	3.22036e-10	Nonimmune-related
MAGEE1	-1.1278	3.64713	39.5188	1.59144e-09	Nonimmune-related
STMN4	-1.12855	5.87041	33.1303	2.70901e-08	Nonimmune-related
PDZD4	-1.12966	6.7934	70.5403	4.48907e-15	Nonimmune-related
TAGLN3	-1.13002	5.609	26.2539	6.29153e-07	Nonimmune-related
KCTD4	-1.13048	1.62225	19.4202	1.60263e-05	Nonimmune-related
PLCB1	-1.13071	5.02179	60.1808	2.7162e-13	Nonimmune-related
ZC3H12B	-1.13083	1.89043	21.9027	4.87348e-06	Nonimmune-related
AC002316.1	-1.13092	4.58452	47.5014	5.12474e-11	Nonimmune-related
CEP170B	-1.13117	5.0111	69.0519	8.01933e-15	Nonimmune-related
FIBCD1	-1.13132	2.00676	33.6709	2.12284e-08	Nonimmune-related
DNAJC6	-1.13163	5.9104	56.787	1.07747e-12	Nonimmune-related
PRR36	-1.13383	4.59362	49.7364	1.99725e-11	Nonimmune-related
FAAH	-1.13517	3.5669	50.4089	1.5066e-11	Nonimmune-related
KIF1A	-1.13659	8.56826	46.8691	6.70053e-11	Nonimmune-related
WNT11	-1.13686	-0.909164	33.5553	2.23555e-08	Nonimmune-related
VWC2L	-1.137	0.927281	21.511	5.87296e-06	Nonimmune-related
CYP46A1	-1.13725	4.52253	58.8033	4.74191e-13	Nonimmune-related
MTRNR2L12	-1.13825	-0.478805	18.4946	2.5091e-05	Nonimmune-related
TLCD3B	-1.13925	3.67034	45.0878	1.43122e-10	Nonimmune-related
KNDC1	-1.13962	5.17671	35.1999	1.07205e-08	Nonimmune-related
MYT1	-1.13987	4.31918	17.2106	4.69476e-05	Nonimmune-related
KCNK5	-1.14008	0.948637	13.5093	0.000294814	Nonimmune-related
OS9	-1.14158	9.43384	33.3075	2.50149e-08	Nonimmune-related
USP44	-1.14162	-1.04792	40.4758	1.04633e-09	Nonimmune-related
SLC6A11	-1.14219	6.65128	20.9233	7.77883e-06	Nonimmune-related
JAKMIP3	-1.14408	2.12426	33.903	1.91314e-08	Nonimmune-related
DTX3	-1.14592	7.83005	30.1399	1.05032e-07	Nonimmune-related
B3GALT2	-1.1492	3.2347	42.1782	5.00313e-10	Nonimmune-related
RFLNA	-1.15155	1.55694	36.398	6.28522e-09	Nonimmune-related
SRCIN1	-1.15572	5.29171	32.495	3.60709e-08	Nonimmune-related
KIF5C	-1.15729	7.32369	62.7205	9.7945e-14	Nonimmune-related
VWA7	-1.15813	0.620091	37.728	3.49016e-09	Nonimmune-related
VAT1L	-1.15839	5.83692	16.2016	7.70935e-05	Nonimmune-related
FBXO41	-1.15927	4.99918	63.8462	6.25091e-14	Nonimmune-related
SCGN	-1.16214	0.467421	8.54926	0.00379844	Nonimmune-related
PCDH15	-1.16247	3.24497	18.355	2.68559e-05	Nonimmune-related
GPR12	-1.16261	2.33114	24.5199	1.41453e-06	Nonimmune-related
PLPPR1	-1.16355	5.21875	21.0069	7.47373e-06	Nonimmune-related
BTBD16	-1.16439	-0.661506	27.9137	2.91441e-07	Nonimmune-related
GPR27	-1.16504	3.04593	26.2398	6.33311e-07	Nonimmune-related
PRRT1	-1.16526	4.16002	67.0936	1.72855e-14	Nonimmune-related
AC005324.4	-1.16905	-1.69777	31.9557	4.59803e-08	Nonimmune-related
PRRT2	-1.17168	5.14816	42.35	4.64466e-10	Nonimmune-related
NOS1	-1.17566	2.74593	14.5442	0.000175474	Antimicrobials
DUSP26	-1.17762	3.97013	45.8378	1.03905e-10	Nonimmune-related
SNCA	-1.17783	5.01347	36.9867	4.84829e-09	Nonimmune-related
KAZALD1	-1.17798	2.31943	22.9146	3.01455e-06	Nonimmune-related
KIF26A	-1.17903	2.68278	35.9148	7.79819e-09	Nonimmune-related
HOXA13	-1.17903	1.29413	10.1909	0.00160639	Nonimmune-related
CENPVL1	-1.18072	-0.69317	16.4747	6.73872e-05	Nonimmune-related
IL1RAPL1	-1.1821	0.0121607	28.9489	1.80997e-07	Nonimmune-related
ATP8A1	-1.18338	5.45542	47.3563	5.44947e-11	Nonimmune-related
FUT9	-1.18404	4.67302	30.2304	1.00784e-07	Nonimmune-related
TSPOAP1	-1.18414	5.27032	51.269	1.05165e-11	Nonimmune-related
RUNX1T1	-1.1844	2.6251	61.4594	1.61862e-13	Nonimmune-related
MARCHF9	-1.18655	6.92206	16.8032	5.73337e-05	Nonimmune-related
RNF165	-1.18681	3.90552	35.3462	1.00437e-08	Nonimmune-related
ANKRD33B	-1.18686	2.90465	49.7682	1.96891e-11	Nonimmune-related
DLGAP1	-1.18755	5.19049	52.2336	7.03708e-12	Nonimmune-related
SLC16A12	-1.18837	0.302197	21.1076	7.12163e-06	Nonimmune-related
TSPAN8	-1.18867	-0.312148	20.0114	1.20502e-05	Nonimmune-related
GOLGA8S	-1.19012	-0.490032	43.3502	3.01169e-10	Nonimmune-related
CCDC177	-1.19185	0.0635873	21.0693	7.25295e-06	Nonimmune-related
BRSK2	-1.19259	4.65926	54.7514	2.48322e-12	Nonimmune-related
KCNH4	-1.19328	0.0282654	37.8786	3.26607e-09	Nonimmune-related
BCL11B	-1.19341	1.62766	38.1344	2.91806e-09	Nonimmune-related
ADCY5	-1.19423	4.50505	48.3276	3.61388e-11	Nonimmune-related
CACNA1H	-1.19434	3.66773	34.4701	1.4851e-08	Nonimmune-related
FCER2	-1.19623	-0.435113	10.1104	0.00167504	Nonimmune-related
GRIN2C	-1.1965	3.66783	26.6648	5.19813e-07	Nonimmune-related
MEGF11	-1.19808	4.51653	38.1113	2.95164e-09	Nonimmune-related
MAPK8IP2	-1.20031	5.73395	62.4406	1.09549e-13	Nonimmune-related
KCNA2	-1.20105	5.35118	58.8703	4.61497e-13	Nonimmune-related
GDAP1L1	-1.20173	4.15435	38.7815	2.19849e-09	Nonimmune-related
CACNG8	-1.20372	4.49733	27.913	2.91752e-07	Nonimmune-related
MACROD2	-1.20401	2.37455	31.4328	5.83272e-08	Nonimmune-related
USP43	-1.20471	1.96183	26.2259	6.37417e-07	Nonimmune-related
CORT	-1.20533	0.213441	37.0617	4.68432e-09	Cytokines
PPP1R1A	-1.20584	3.66616	17.5258	4.02354e-05	Nonimmune-related
TENM3	-1.20682	4.23576	19.0158	1.94886e-05	Nonimmune-related
DUSP8	-1.20713	4.43458	73.3724	1.50064e-15	Nonimmune-related
TDRD9	-1.2086	1.02995	28.056	2.72999e-07	Nonimmune-related
TMEM63C	-1.20932	3.57751	67.3663	1.55147e-14	Nonimmune-related
FAM155B	-1.2103	2.3868	35.2312	1.05702e-08	Nonimmune-related
GLI1	-1.21072	2.48639	14.8058	0.000154013	Nonimmune-related
NCDN	-1.21109	7.11381	67.3658	1.55308e-14	Nonimmune-related
SGIP1	-1.21189	4.13984	75.4272	6.82194e-16	Nonimmune-related
OR2L13	-1.21244	-0.390094	15.5785	0.000104909	Nonimmune-related
MGAT4C	-1.2157	2.70414	20.7397	8.49384e-06	Nonimmune-related
SORCS2	-1.21626	4.73069	49.5248	2.18285e-11	Nonimmune-related
TUBB4A	-1.21632	8.10611	24.6751	1.31521e-06	Nonimmune-related
SEZ6L	-1.21646	6.9916	31.8282	4.87601e-08	Nonimmune-related
SAPCD2	-1.2171	5.1574	51.0702	1.14263e-11	Nonimmune-related
ATRNL1	-1.21777	4.31119	35.3691	9.94166e-09	Nonimmune-related
RBM11	-1.21823	0.0280737	26.4036	5.86582e-07	Nonimmune-related
C3orf80	-1.21923	1.34924	35.6662	8.69976e-09	Nonimmune-related
ATP13A5	-1.2193	1.56075	33.0202	2.84468e-08	Nonimmune-related
CNTFR	-1.22038	5.78755	43.3148	3.06301e-10	Cytokine_Receptors
NPTXR	-1.22241	7.20198	50.803	1.27763e-11	Nonimmune-related
ETNPPL	-1.22776	5.54513	18.2748	2.79233e-05	Nonimmune-related
DNAH14	-1.22898	-0.403502	27.949	2.86758e-07	Nonimmune-related
CNKSR2	-1.22902	4.44518	87.5418	7.29145e-18	Nonimmune-related
SFTPC	-1.22984	0.294955	27.106	4.2344e-07	Nonimmune-related
FNDC5	-1.22986	3.81918	64.139	5.56343e-14	Nonimmune-related
SSTR2	-1.23	3.28196	41.6018	6.42213e-10	Cytokine_Receptors
FAM155A	-1.23071	3.42534	37.2231	4.36717e-09	Nonimmune-related
CTSV	-1.23109	1.16516	31.6553	5.26914e-08	Nonimmune-related
ATP1A4	-1.23289	-1.21396	29.7702	1.24247e-07	Nonimmune-related
PRRG3	-1.23367	1.66526	18.6429	2.33496e-05	Nonimmune-related
COL11A2	-1.23475	3.447	50.977	1.18799e-11	Nonimmune-related
MYH7B	-1.23479	1.59601	40.0457	1.26228e-09	Nonimmune-related
PDE11A	-1.23751	0.390424	30.91	7.38943e-08	Nonimmune-related
CYS1	-1.23763	1.60409	39.8545	1.37224e-09	Nonimmune-related
CDH3	-1.23842	2.60896	28.4143	2.31593e-07	Nonimmune-related
RALYL	-1.23928	2.69326	26.5796	5.40783e-07	Nonimmune-related
ENC1	-1.23931	7.63982	54.4566	2.80383e-12	Nonimmune-related
C2CD4C	-1.24003	2.83498	53.4769	4.19682e-12	Nonimmune-related
PDZD7	-1.24185	1.23669	60.9424	1.99257e-13	Nonimmune-related
NRIP3	-1.24229	3.49617	43.0087	3.49492e-10	Nonimmune-related
GABBR2	-1.24308	5.85416	25.2972	9.82867e-07	Nonimmune-related
TMEM179	-1.24317	3.56116	34.7531	1.30859e-08	Nonimmune-related
GPR179	-1.24332	0.496073	35.9769	7.57728e-09	Nonimmune-related
DPP10	-1.24483	3.74747	25.8361	7.64279e-07	Nonimmune-related
RFPL2	-1.24571	-1.14578	26.3385	6.04573e-07	Nonimmune-related
ATP6V1G2	-1.24621	5.46306	59.1054	4.1955e-13	Nonimmune-related
LGI3	-1.2465	5.25563	23.1185	2.73728e-06	Nonimmune-related
ANKS1B	-1.24656	4.95396	41.5838	6.47245e-10	Nonimmune-related
EXTL1	-1.24763	3.31273	42.8218	3.78836e-10	Nonimmune-related
PAX5	-1.24832	-1.00329	16.9891	5.23329e-05	Nonimmune-related
DCX	-1.24938	5.59486	18.5245	2.47323e-05	Nonimmune-related
PDXP	-1.25014	5.47498	83.3589	3.42335e-17	Nonimmune-related
NRN1L	-1.2519	-0.138296	49.4648	2.23401e-11	Nonimmune-related
PGR	-1.25261	-0.247804	23.9363	1.86062e-06	Cytokine_Receptors
CHRNA3	-1.25323	-0.179374	23.2415	2.58221e-06	Nonimmune-related
MEGF6	-1.25354	2.94651	34.6075	1.39661e-08	Nonimmune-related
CYP2E1	-1.25497	0.726293	51.1317	1.11128e-11	Nonimmune-related
SH3GL3	-1.25761	3.266	21.3814	6.2487e-06	Nonimmune-related
PGA3	-1.25781	-0.705153	16.863	5.56742e-05	Nonimmune-related
CHRM5	-1.26113	-0.0486316	23.1337	2.71738e-06	Nonimmune-related
DMTN	-1.26696	5.71356	50.9902	1.1815e-11	Nonimmune-related
SLIT2	-1.26987	3.5459	25.5681	8.6605e-07	Chemokines	Cytokines
AMZ1	-1.27219	2.53104	46.0218	9.60106e-11	Nonimmune-related
NPFFR1	-1.27268	-0.102536	23.9737	1.82826e-06	Nonimmune-related
NR0B1	-1.27307	0.667684	12.09	0.000604938	Cytokine_Receptors
OTUD7A	-1.27323	3.59048	66.7526	1.97701e-14	Nonimmune-related
DRD1	-1.27419	1.00791	17.2333	4.64271e-05	Nonimmune-related
ABCC8	-1.27488	3.14102	37.8928	3.24983e-09	Nonimmune-related
ARHGEF25	-1.27657	6.43598	46.4026	8.16933e-11	Nonimmune-related
OLFM1	-1.27675	7.20898	44.428	1.89844e-10	Nonimmune-related
OBSCN	-1.27694	2.95534	50.5392	1.4264e-11	Nonimmune-related
KIAA0319	-1.2771	3.29862	37.4484	3.95356e-09	Nonimmune-related
TMC2	-1.27782	-1.4092	31.5988	5.40475e-08	Nonimmune-related
STXBP5	-1.27902	3.83698	97.6453	1.88868e-19	Nonimmune-related
SOX10	-1.27938	6.42494	15.8447	9.1955e-05	Nonimmune-related
ADGRA1	-1.28148	4.62692	53.8947	3.53551e-12	Nonimmune-related
GOLGA7B	-1.28482	4.46166	42.3144	4.71687e-10	Nonimmune-related
TRIM71	-1.28542	0.93244	31.8801	4.7595e-08	Nonimmune-related
SLITRK5	-1.28585	3.66783	49.2093	2.49238e-11	Nonimmune-related
KCNK1	-1.2868	3.62532	29.7439	1.25856e-07	Nonimmune-related
CHAD	-1.28772	1.36953	16.4464	6.8333e-05	Nonimmune-related
KCNAB1	-1.28841	3.16655	73.8568	1.24169e-15	Nonimmune-related
DAB1	-1.29145	3.13508	39.3258	1.73171e-09	Nonimmune-related
PPFIA3	-1.29315	4.37699	109.851	2.67707e-21	Nonimmune-related
KCNC1	-1.29366	3.90727	56.8831	1.036e-12	Nonimmune-related
MMD2	-1.29397	3.58604	37.5747	3.73915e-09	Nonimmune-related
SYN3	-1.2943	1.36336	50.1623	1.66701e-11	Nonimmune-related
PRKCE	-1.29587	4.452	103.418	2.47745e-20	Nonimmune-related
TPPP	-1.29602	6.77116	27.5958	3.37771e-07	Nonimmune-related
ZNF536	-1.29961	3.43399	31.8967	4.72703e-08	Nonimmune-related
SCX	-1.30041	2.06319	29.3719	1.49209e-07	Nonimmune-related
BEX5	-1.30087	3.15034	44.4375	1.89073e-10	Nonimmune-related
ATP2C2	-1.30108	0.811537	38.965	2.02564e-09	Nonimmune-related
GPC3	-1.30192	2.93312	17.0136	5.1707e-05	Nonimmune-related
ERC2	-1.30269	3.00492	50.4784	1.46339e-11	Nonimmune-related
GRIP2	-1.30397	1.54103	33.3061	2.50214e-08	Nonimmune-related
CNTN6	-1.30806	0.382147	46.227	8.78702e-11	Nonimmune-related
NRSN1	-1.30828	4.01339	41.8581	5.74688e-10	Nonimmune-related
PCP4L1	-1.30843	2.19052	25.6133	8.47961e-07	Nonimmune-related
SIAH3	-1.30894	0.23958	24.2752	1.58676e-06	Nonimmune-related
PPP1R16B	-1.30907	5.24312	35.4073	9.77391e-09	Nonimmune-related
DLX2	-1.30909	1.36175	17.7472	3.61111e-05	Nonimmune-related
C1QTNF4	-1.31087	1.88625	42.0434	5.29792e-10	Nonimmune-related
ARPP21	-1.31169	3.85245	45.3397	1.28514e-10	Nonimmune-related
SLC6A20	-1.31199	-0.124061	15.4463	0.000112014	Nonimmune-related
PCDH7	-1.31611	4.69887	42.4262	4.49422e-10	Nonimmune-related
NXPH2	-1.31613	-0.894672	20.2126	1.09395e-05	Nonimmune-related
PLK5	-1.31776	-0.384154	44.0816	2.19893e-10	Nonimmune-related
NKAIN1	-1.31809	3.47133	31.4299	5.84044e-08	Nonimmune-related
H3C14	-1.32071	-0.511522	38.888	2.09523e-09	Nonimmune-related
H3C15	-1.32071	-0.511522	38.888	2.09523e-09	Nonimmune-related
PDIA2	-1.32088	2.13314	32.2829	3.96962e-08	Antigen_Processing_and_Presentation
MTMR7	-1.32109	2.46172	71.0941	3.60656e-15	Nonimmune-related
RTP5	-1.32563	2.26931	24.005	1.80176e-06	Nonimmune-related
ADCY1	-1.32621	5.74679	37.3837	4.06816e-09	Nonimmune-related
SUSD5	-1.32644	3.01217	28.445	2.28341e-07	Nonimmune-related
PNMT	-1.32747	1.8122	18.9502	2.01174e-05	Nonimmune-related
ITPRID1	-1.32749	1.67776	7.92045	0.00530696	Nonimmune-related
MCF2L2	-1.32858	2.92182	38.7299	2.24885e-09	Nonimmune-related
P2RX5	-1.32867	0.507475	38.0369	3.04601e-09	Nonimmune-related
SMPD3	-1.33009	3.28366	56.5393	1.1923e-12	Nonimmune-related
MNX1	-1.33131	-0.4296	13.1605	0.000351492	Nonimmune-related
STUM	-1.33441	5.23722	43.761	2.52783e-10	Nonimmune-related
CRLF1	-1.33514	4.1752	19.6662	1.42314e-05	Cytokine_Receptors
DSCAML1	-1.33521	3.861	40.923	8.62445e-10	Nonimmune-related
CACNG5	-1.33597	-0.345396	17.721	3.65764e-05	Nonimmune-related
KCNAB2	-1.33648	5.715	61.6827	1.48425e-13	Nonimmune-related
PNMA6A	-1.33729	3.48209	72.5142	2.08928e-15	Nonimmune-related
MDGA2	-1.33731	1.61815	26.2998	6.15879e-07	Nonimmune-related
GDF6	-1.33765	-0.82333	26.4921	5.63088e-07	Cytokines	TGFb_Family_Member
DYNC1I1	-1.33859	4.41652	36.2601	6.68965e-09	Nonimmune-related
GATA4	-1.33978	1.58518	10.8377	0.00114945	Nonimmune-related
ANK3	-1.34084	5.00307	53.567	4.04844e-12	Nonimmune-related
VIPR2	-1.34128	4.40447	17.7462	3.61295e-05	Cytokine_Receptors
PTGER2	-1.34273	0.101199	19.5446	1.5092e-05	Cytokine_Receptors
KCNA5	-1.34445	1.68037	19.8719	1.28884e-05	Nonimmune-related
DACH2	-1.34471	1.43565	19.3714	1.64085e-05	Nonimmune-related
DGKE	-1.34495	2.44396	64.7171	4.40739e-14	Nonimmune-related
ISLR2	-1.34835	2.57796	31.4292	5.84226e-08	Nonimmune-related
GALNT17	-1.34915	4.32404	19.4947	1.54594e-05	Nonimmune-related
PLIN4	-1.34957	1.98666	33.2888	2.5226e-08	Nonimmune-related
ALB	-1.35105	0.0904092	26.312	6.12333e-07	Antimicrobials
NRG3	-1.35321	3.07693	39.0235	1.97704e-09	Cytokines
RTN4R	-1.3537	2.85439	58.9483	4.46745e-13	Nonimmune-related
CPEB3	-1.35662	3.1207	80.5302	9.82553e-17	Nonimmune-related
AP006333.1	-1.35685	3.51187	60.3378	2.54951e-13	Nonimmune-related
HPCA	-1.35738	4.68367	31.1175	6.72999e-08	Nonimmune-related
FGFR3	-1.35805	7.56995	38.279	2.7417e-09	Cytokine_Receptors
PEX5L	-1.35897	4.44337	29.8241	1.21325e-07	Nonimmune-related
XKR4	-1.36036	3.17684	43.312	3.06668e-10	Nonimmune-related
ZDHHC22	-1.36143	4.99788	56.4363	1.2436e-12	Nonimmune-related
KCNK4	-1.36166	-0.175721	32.2734	3.9839e-08	Nonimmune-related
CORO6	-1.36372	1.62413	55.4882	1.82959e-12	Nonimmune-related
GALNTL5	-1.36408	-1.55469	17.7349	3.63289e-05	Nonimmune-related
FO681492.1	-1.36664	1.07759	48.2959	3.65522e-11	Nonimmune-related
GFOD1	-1.36831	4.11878	98.1422	1.58761e-19	Nonimmune-related
KIAA0513	-1.36877	5.93111	81.6791	6.40886e-17	Nonimmune-related
ATOH7	-1.36906	-1.14815	46.34	8.3746e-11	Nonimmune-related
ACAN	-1.36992	3.76902	17.9625	3.25113e-05	Nonimmune-related
GABRG1	-1.37081	4.02471	14.1675	0.000211846	Nonimmune-related
NAP1L2	-1.37126	4.0033	53.6917	3.84485e-12	Nonimmune-related
KLHL35	-1.37194	1.06391	42.4205	4.49832e-10	Nonimmune-related
PTPN20	-1.37255	0.170916	25.8671	7.53329e-07	Nonimmune-related
CYP4X1	-1.37264	0.941527	46.177	8.97623e-11	Nonimmune-related
RBP4	-1.37403	1.5227	31.3784	5.97829e-08	Antimicrobials
CDK5R1	-1.37487	5.60236	71.397	3.21891e-15	Nonimmune-related
ACVR1C	-1.3752	1.43553	30.4297	9.20282e-08	Cytokine_Receptors	TGFb_Family_Member_Receptor
PAH	-1.37531	0.851501	36.0225	7.42771e-09	Nonimmune-related
TMEM200A	-1.37701	1.83781	30.9698	7.19728e-08	Nonimmune-related
ATCAY	-1.37788	6.37802	29.5695	1.36305e-07	Nonimmune-related
KLHL34	-1.37974	-1.36376	41.4262	6.92038e-10	Nonimmune-related
MN1	-1.37999	3.93399	54.5979	2.64526e-12	Nonimmune-related
TUBA8	-1.38014	2.62109	57.9197	6.7818e-13	Nonimmune-related
PPFIA2	-1.38052	3.94481	31.8465	4.83572e-08	Nonimmune-related
CHRNB2	-1.38147	3.8952	52.2274	7.05526e-12	Nonimmune-related
TRPM3	-1.3823	4.37172	29.8485	1.19978e-07	Nonimmune-related
SYT15	-1.38274	1.11491	61.5617	1.55347e-13	Nonimmune-related
TENM2	-1.38277	3.55595	24.2138	1.63323e-06	Nonimmune-related
CRTAC1	-1.38309	3.75195	34.1647	1.70261e-08	Nonimmune-related
SLC26A8	-1.3845	-1.10129	44.8788	1.56237e-10	Nonimmune-related
PAK6	-1.38504	3.01897	43.0181	3.48071e-10	TCRsignalingPathway
MAST1	-1.38506	4.46774	74.9059	8.32792e-16	Nonimmune-related
FEZF2	-1.38558	0.749406	25.5424	8.76504e-07	Nonimmune-related
C6orf223	-1.38649	-0.68076	25.7812	7.84047e-07	Nonimmune-related
CAMKK1	-1.38707	4.57573	62.081	1.26516e-13	Nonimmune-related
CPXM2	-1.38749	3.02973	17.7988	3.52133e-05	Nonimmune-related
GABBR1	-1.38822	7.46547	85.9882	1.29179e-17	Nonimmune-related
SLC27A2	-1.38832	-0.764005	27.1359	4.17756e-07	Nonimmune-related
ELAVL4	-1.39188	4.31092	37.5421	3.79341e-09	Nonimmune-related
NECAB2	-1.39218	3.61927	41.8429	5.78474e-10	Nonimmune-related
SP9	-1.39276	0.698674	28.3447	2.39126e-07	Nonimmune-related
CDKL5	-1.39747	4.25737	85.6487	1.46435e-17	Nonimmune-related
TCEAL6	-1.39817	2.97453	31.3913	5.94363e-08	Nonimmune-related
PNCK	-1.4006	3.21156	56.2174	1.36015e-12	Nonimmune-related
SLC8A3	-1.40076	3.60186	38.7906	2.18975e-09	Nonimmune-related
CABLES1	-1.40185	4.376	77.4776	3.1236e-16	Nonimmune-related
GABRA2	-1.40346	4.12391	31.2047	6.46891e-08	Nonimmune-related
TRPV6	-1.40573	-0.193004	35.6174	8.8933e-09	Nonimmune-related
UNC5D	-1.40637	3.14455	33.3579	2.44545e-08	Nonimmune-related
DLG2	-1.40712	5.03825	68.8475	8.68637e-15	Nonimmune-related
PWWP3B	-1.408	0.935497	29.393	1.47775e-07	Nonimmune-related
PHACTR3	-1.4099	5.15559	43.2843	3.10345e-10	Nonimmune-related
KCNH7	-1.41388	-0.11059	28.7121	2.01932e-07	Nonimmune-related
SLC7A14	-1.41901	3.88036	35.374	9.92e-09	Nonimmune-related
CALN1	-1.41941	3.9046	22.9676	2.93978e-06	Nonimmune-related
TBC1D30	-1.42106	3.02106	81.4524	6.95321e-17	Nonimmune-related
UBE2QL1	-1.42476	4.02534	46.2989	8.538e-11	Nonimmune-related
DIRAS2	-1.42613	5.09033	52.6354	5.95534e-12	Nonimmune-related
MATK	-1.43017	2.28168	48.1472	3.89844e-11	Nonimmune-related
NGEF	-1.43364	4.90462	39.249	1.791e-09	Nonimmune-related
SLC26A10	-1.43631	3.85458	27.9067	2.92609e-07	Nonimmune-related
OPRD1	-1.43872	1.69955	43.7143	2.57743e-10	Cytokine_Receptors
DNM3	-1.43956	4.98814	85.4856	1.55528e-17	Nonimmune-related
PRKCZ	-1.43986	4.96776	59.6677	3.34163e-13	Nonimmune-related
ANKRD34A	-1.4402	2.43922	103.328	2.53874e-20	Nonimmune-related
BASP1	-1.44022	6.23615	65.2676	3.55467e-14	Nonimmune-related
KCNK3	-1.44023	2.44833	49.3977	2.30263e-11	Nonimmune-related
BICDL1	-1.44255	2.03083	48.165	3.86804e-11	Nonimmune-related
RAPGEF4	-1.4469	5.29517	65.8355	2.83919e-14	Nonimmune-related
HLF	-1.44826	4.6258	66.7252	1.99845e-14	Nonimmune-related
LRRTM1	-1.44973	2.74388	57.8874	6.87945e-13	Nonimmune-related
PDE1A	-1.4502	3.26799	48.9701	2.75639e-11	Nonimmune-related
FGF17	-1.45068	0.15762	43.2993	3.07846e-10	Cytokines
PTH2R	-1.4513	-0.345954	34.4922	1.46962e-08	Cytokine_Receptors
WNK2	-1.45146	4.44631	36.1909	6.89843e-09	Nonimmune-related
BRINP1	-1.45313	4.49751	38.3786	2.62423e-09	Nonimmune-related
DLX5	-1.45525	2.69739	17.2782	4.54185e-05	Nonimmune-related
TTC9B	-1.45671	3.35018	44.5362	1.81236e-10	Nonimmune-related
PTGFR	-1.45688	0.302028	20.3566	1.02078e-05	Cytokine_Receptors
SCN8A	-1.45847	4.31231	91.3527	1.8147e-18	Nonimmune-related
GLRA3	-1.45851	1.73166	13.9549	0.000235671	Nonimmune-related
SERPINI1	-1.46048	4.98905	50.6574	1.35779e-11	Nonimmune-related
GRIP1	-1.4612	0.532233	30.8118	7.73354e-08	Nonimmune-related
KCNQ5	-1.46126	3.26655	39.3735	1.69596e-09	Nonimmune-related
CYP27C1	-1.46163	0.714046	37.566	3.7514e-09	Nonimmune-related
LNX1	-1.46262	4.15034	55.7265	1.66332e-12	Nonimmune-related
IPCEF1	-1.46276	3.30309	58.197	6.06542e-13	Nonimmune-related
EPB41L4B	-1.46358	2.95996	49.8567	1.89892e-11	Nonimmune-related
HMGCLL1	-1.46656	1.4257	34.961	1.1926e-08	Nonimmune-related
RTBDN	-1.46746	0.25634	39.9951	1.29088e-09	Nonimmune-related
STXBP1	-1.46907	6.88964	91.6781	1.61279e-18	Nonimmune-related
SLC4A10	-1.4712	3.96463	53.7226	3.79604e-12	Nonimmune-related
PGAP4	-1.47472	4.07676	45.4463	1.22796e-10	Nonimmune-related
FRAS1	-1.47507	2.63445	28.4115	2.31893e-07	Nonimmune-related
LINGO2	-1.47689	-0.0589339	20.0554	1.17987e-05	Nonimmune-related
PRDM8	-1.47822	3.0063	44.1198	2.16682e-10	Nonimmune-related
RAB11FIP4	-1.47923	5.48313	66.5465	2.14433e-14	Nonimmune-related
CDKL2	-1.48109	0.966012	39.6377	1.50983e-09	Nonimmune-related
SCRT2	-1.48487	1.58265	20.4874	9.5865e-06	Nonimmune-related
C1orf115	-1.4857	4.29469	67.0262	1.77507e-14	Nonimmune-related
SLIT3	-1.48587	3.46105	47.0335	6.24892e-11	Nonimmune-related
KCNN1	-1.48618	3.28875	66.2727	2.38888e-14	Nonimmune-related
LBX1	-1.49076	-0.517469	17.2828	4.53156e-05	Nonimmune-related
CASKIN1	-1.49173	4.29215	81.9636	5.76173e-17	Nonimmune-related
CACNA1S	-1.4918	-0.245697	20.5964	9.09805e-06	Nonimmune-related
RAB6C	-1.49222	-0.933115	38.8225	2.1569e-09	Nonimmune-related
VAX1	-1.49272	-0.216062	20.7427	8.48168e-06	Nonimmune-related
GALNT9	-1.49311	3.0817	29.6935	1.28792e-07	Nonimmune-related
DNM1	-1.49539	6.78402	58.995	4.38743e-13	Nonimmune-related
ACTL6B	-1.49641	3.17632	29.8916	1.17639e-07	Nonimmune-related
LHX6	-1.49686	1.75822	56.2241	1.35361e-12	Nonimmune-related
STX1A	-1.50045	4.67318	73.2182	1.59244e-15	Nonimmune-related
MPP7	-1.50159	0.680009	49.5702	2.13718e-11	Nonimmune-related
CAPN13	-1.50178	-1.25568	27.3108	3.85338e-07	Nonimmune-related
EPHB6	-1.50197	4.50256	51.4048	9.93729e-12	Nonimmune-related
PLCXD2	-1.50299	-1.08004	46.353	8.32851e-11	Nonimmune-related
KCNA4	-1.50744	0.00691288	26.0685	6.85851e-07	Nonimmune-related
RUNDC3A	-1.50755	5.73455	73.8477	1.2499e-15	Nonimmune-related
BCL11A	-1.50904	2.84105	55.5945	1.75591e-12	Nonimmune-related
SOWAHA	-1.51017	3.30405	48.8627	2.88387e-11	Nonimmune-related
OGDHL	-1.51387	4.05103	45.3494	1.27984e-10	Nonimmune-related
PNMA8B	-1.51552	4.68356	88.7635	4.65983e-18	Nonimmune-related
GABRA3	-1.51575	3.59405	33.6474	2.14714e-08	Nonimmune-related
ANKRD55	-1.51711	-0.39547	58.6838	4.96378e-13	Nonimmune-related
SLC9A2	-1.51946	-0.726758	39.7816	1.41712e-09	Nonimmune-related
CPLX1	-1.52177	4.31207	48.2722	3.69938e-11	Nonimmune-related
IGFBPL1	-1.52486	0.842078	21.4762	5.97217e-06	Nonimmune-related
CSMD3	-1.52603	2.39509	31.613	5.37504e-08	Nonimmune-related
GREM2	-1.52615	0.972988	40.7483	9.30082e-10	Cytokines
SGSM1	-1.52733	3.10173	55.228	2.04111e-12	Nonimmune-related
RHOV	-1.52871	-1.0335	59.1583	4.09517e-13	Nonimmune-related
SYNGR1	-1.52888	6.35795	130.658	2.66192e-24	Nonimmune-related
CHGB	-1.53489	5.06452	45.0328	1.46527e-10	Cytokines
SLC7A10	-1.53648	3.00372	17.6703	3.74932e-05	Nonimmune-related
GNAL	-1.53671	3.78389	60.7887	2.12598e-13	Nonimmune-related
DOC2A	-1.53802	3.54968	45.0042	1.48334e-10	Nonimmune-related
SYT5	-1.53984	4.00377	42.139	5.08864e-10	Nonimmune-related
KLHDC7A	-1.54248	0.327779	18.8119	2.15123e-05	Nonimmune-related
AL353588.1	-1.54644	-0.804657	39.0444	1.95713e-09	Nonimmune-related
SLC22A6	-1.54728	0.396399	22.483	3.6987e-06	Nonimmune-related
MFSD4A	-1.54743	3.95098	76.5159	4.5028e-16	Nonimmune-related
JPH4	-1.54776	5.44178	59.9125	3.0269e-13	Nonimmune-related
GRM1	-1.54858	1.88965	37.4373	3.97293e-09	Nonimmune-related
PLCH2	-1.54951	3.32179	39.0885	1.92147e-09	Nonimmune-related
OPALIN	-1.54966	4.58319	13.9469	0.000236619	Nonimmune-related
NETO1	-1.55187	2.62082	32.8635	3.05484e-08	Nonimmune-related
VSTM2L	-1.55218	3.89248	44.1326	2.15496e-10	Nonimmune-related
TMEM196	-1.5529	1.51408	29.5397	1.38177e-07	Nonimmune-related
ADCYAP1	-1.55318	1.29203	48.5701	3.25831e-11	Nonimmune-related
HSPB3	-1.55322	-0.424735	25.7325	8.02099e-07	Nonimmune-related
SH3GL2	-1.55588	4.94902	37.364	4.10362e-09	Nonimmune-related
ZFR2	-1.55626	1.55957	39.9321	1.32838e-09	Nonimmune-related
SYP	-1.55856	6.60551	78.7619	1.92024e-16	Nonimmune-related
AKAP5	-1.55878	2.61569	87.8917	6.38237e-18	Nonimmune-related
CDH22	-1.56882	2.8771	38.4079	2.59061e-09	Nonimmune-related
CDH7	-1.56932	0.449107	26.4341	5.78609e-07	Nonimmune-related
PTER	-1.57083	3.13853	46.8806	6.66782e-11	Nonimmune-related
FAM153A	-1.57103	-0.316344	25.6991	8.14683e-07	Nonimmune-related
AFF2	-1.57156	2.09057	29.4919	1.41235e-07	Nonimmune-related
AIFM3	-1.57299	4.36202	31.3412	6.0802e-08	Nonimmune-related
GRM2	-1.57426	1.50366	53.2291	4.64879e-12	Nonimmune-related
PTPN5	-1.57664	3.87825	35.0954	1.12318e-08	Nonimmune-related
COL2A1	-1.57928	2.63557	16.0972	8.11721e-05	Nonimmune-related
PCDH20	-1.58016	2.16256	49.5973	2.11737e-11	Nonimmune-related
CA10	-1.58064	4.50777	25.7468	7.96773e-07	Nonimmune-related
CACNA2D2	-1.5809	2.51358	65.5977	3.11717e-14	Nonimmune-related
MKX	-1.58097	1.40258	28.1075	2.6673e-07	Nonimmune-related
TNNT2	-1.58161	-0.101963	21.0063	7.47589e-06	Nonimmune-related
ACBD7	-1.58575	2.72211	55.223	2.04528e-12	Nonimmune-related
PLIN1	-1.58674	1.70771	42.5368	4.28439e-10	Nonimmune-related
IL12RB2	-1.58954	-0.649129	49.4728	2.22651e-11	Cytokine_Receptors	Interleukins_Receptor
SCN5A	-1.59057	0.107746	44.5365	1.81004e-10	Nonimmune-related
CD24	-1.59257	7.08497	25.4014	9.3617e-07	Nonimmune-related
NPTX1	-1.59442	5.69337	31.7646	5.01837e-08	Nonimmune-related
NDST3	-1.59488	1.15717	21.9576	4.74793e-06	Nonimmune-related
UNC13A	-1.5951	5.58409	64.6347	4.56876e-14	Nonimmune-related
VWA5B2	-1.59608	2.3436	58.8311	4.68865e-13	Nonimmune-related
HSPA12A	-1.5971	4.9888	103.734	2.21835e-20	Nonimmune-related
GAD1	-1.59758	4.98423	65.0995	3.79956e-14	Nonimmune-related
TFAP2B	-1.59773	0.754265	15.9841	8.58352e-05	Nonimmune-related
MCF2	-1.60075	1.21044	44.4078	1.91401e-10	Nonimmune-related
HS3ST4	-1.6015	2.19647	33.3373	2.46813e-08	Nonimmune-related
KCNB1	-1.60222	4.73128	63.2856	7.81597e-14	Nonimmune-related
GRM7	-1.60416	1.38391	32.6037	3.43445e-08	Nonimmune-related
C11orf87	-1.60693	2.97635	34.8692	1.2425e-08	Nonimmune-related
RGS7	-1.60742	3.02062	60.9743	1.97297e-13	Nonimmune-related
KCNH3	-1.61001	3.83966	68.735	9.0772e-15	Nonimmune-related
F5	-1.61002	3.04759	19.6746	1.4174e-05	Nonimmune-related
KCNIP2	-1.61177	3.75839	73.7121	1.31678e-15	Nonimmune-related
CAMSAP3	-1.61184	2.66	55.9263	1.53247e-12	Nonimmune-related
RASGRF2	-1.61664	3.89901	80.6167	9.54563e-17	Nonimmune-related
ATP6V0A4	-1.61939	-0.114415	22.3036	4.02763e-06	Nonimmune-related
TMEM271	-1.61998	-0.851161	38.1401	2.91338e-09	Nonimmune-related
ATP2B2	-1.62108	6.03206	90.295	2.66503e-18	Nonimmune-related
STXBP6	-1.62123	3.54031	65.2366	3.59854e-14	Nonimmune-related
KCNS1	-1.62669	2.41005	38.1602	2.88884e-09	Nonimmune-related
STXBP5L	-1.62685	3.36095	53.0844	4.94358e-12	Nonimmune-related
GLP2R	-1.62808	-0.0350175	34.9819	1.18152e-08	Cytokine_Receptors
NAPB	-1.62956	5.96981	85.2435	1.70096e-17	Nonimmune-related
RASAL1	-1.63079	2.63181	29.2382	1.58634e-07	Nonimmune-related
OPCML	-1.63286	5.06956	57.3457	8.57771e-13	Nonimmune-related
GRIN2A	-1.63627	4.22278	30.5	8.91258e-08	Nonimmune-related
HPCAL4	-1.63783	5.61893	41.0839	8.04186e-10	Nonimmune-related
ICAM5	-1.63787	3.04933	40.7839	9.16277e-10	Nonimmune-related
SYT7	-1.63948	4.94523	54.9776	2.26252e-12	Nonimmune-related
NTN4	-1.63961	3.52426	68.9685	8.2852e-15	Nonimmune-related
FGF9	-1.63996	1.06071	45.78	1.0644e-10	Cytokines
CALB1	-1.64187	2.61425	30.9796	7.16533e-08	Nonimmune-related
TRPC5	-1.64238	-0.956675	30.3007	9.76007e-08	Nonimmune-related
TACC3	-1.64276	5.98434	64.9909	3.96662e-14	Nonimmune-related
CAMK4	-1.64293	4.00064	68.6903	9.23748e-15	Nonimmune-related
VSTM2B	-1.64345	2.74437	36.1742	6.94968e-09	Nonimmune-related
PITPNM3	-1.64401	4.19483	76.9332	3.84146e-16	Nonimmune-related
CACNA1E	-1.64473	3.8342	52.3208	6.78664e-12	Nonimmune-related
SCN2A	-1.64931	4.74723	98.8473	1.23638e-19	Nonimmune-related
SHISA2	-1.65129	0.887235	25.6873	8.19187e-07	Nonimmune-related
ASIC2	-1.65533	1.83719	32.6059	3.43096e-08	Nonimmune-related
TSHR	-1.65595	1.92569	20.8216	8.16704e-06	Cytokine_Receptors
GFRA1	-1.65616	4.05754	30.6378	8.37054e-08	Nonimmune-related
CACNA2D3	-1.657	2.20934	56.9991	9.88064e-13	Nonimmune-related
DLX6	-1.65865	1.50052	19.8849	1.28079e-05	Nonimmune-related
KCNJ9	-1.6595	4.39071	58.1061	6.2938e-13	Nonimmune-related
NMNAT2	-1.65963	4.90226	65.4123	3.35666e-14	Nonimmune-related
CELF5	-1.66022	4.32753	44.3376	1.97348e-10	Nonimmune-related
GNG3	-1.66094	4.8874	41.7977	5.89927e-10	Nonimmune-related
IGF2	-1.66164	6.85914	27.536	3.4723e-07	Cytokines
SAMD12	-1.66199	2.61934	86.1912	1.19556e-17	Nonimmune-related
KCNK9	-1.66206	0.967956	38.2189	2.81519e-09	Nonimmune-related
SPAG6	-1.66299	-0.629112	45.9938	9.71062e-11	Nonimmune-related
CYP27B1	-1.663	3.29812	21.8085	5.09707e-06	Nonimmune-related
RGS4	-1.66467	5.06501	35.9848	7.55936e-09	Nonimmune-related
PRKCB	-1.66704	5.48377	56.8982	1.02965e-12	BCRSignalingPathway	NaturalKiller_Cell_Cytotoxicity
NEFL	-1.6746	6.07027	21.7357	5.27703e-06	Nonimmune-related
PAK3	-1.67475	4.1118	64.0874	5.67876e-14	TCRsignalingPathway
TNR	-1.67495	7.58985	49.3982	2.3021e-11	Nonimmune-related
CELF3	-1.67712	4.51477	50.0917	1.72069e-11	Nonimmune-related
ABCG4	-1.68081	1.47563	97.7833	1.79202e-19	Nonimmune-related
ARHGDIG	-1.68233	3.56961	43.402	2.95008e-10	Nonimmune-related
SDR16C5	-1.68397	-0.625306	28.2227	2.52939e-07	Nonimmune-related
SHISA7	-1.68857	4.03491	51.3495	1.01692e-11	Nonimmune-related
CLVS2	-1.68879	3.364	44.991	1.49174e-10	Nonimmune-related
TRIM67	-1.68993	2.69482	32.1944	4.13159e-08	Nonimmune-related
SV2C	-1.69001	1.91597	42.88	3.6944e-10	Nonimmune-related
KCNK12	-1.6918	1.25304	51.8038	8.40948e-12	Nonimmune-related
PTPRR	-1.69704	1.67136	45.7674	1.0707e-10	Nonimmune-related
PSD	-1.69868	5.5384	62.4659	1.08444e-13	Nonimmune-related
SYN1	-1.70202	5.91872	50.9443	1.20435e-11	Nonimmune-related
CNTNAP5	-1.70239	0.989729	38.2838	2.7359e-09	Nonimmune-related
PCDH11X	-1.70286	1.87881	27.1596	4.13258e-07	Nonimmune-related
STX1B	-1.71648	5.3416	89.3633	3.74264e-18	Nonimmune-related
INSM2	-1.71656	-1.06589	39.5004	1.60394e-09	Nonimmune-related
RIMS3	-1.71805	5.28308	86.1649	1.21025e-17	Nonimmune-related
CDK5R2	-1.7187	3.78517	53.0562	5.00179e-12	Nonimmune-related
SMIM10L2B	-1.71941	2.82218	101.72	4.47468e-20	Nonimmune-related
PRKG2	-1.72072	0.425782	26.008	7.05444e-07	Nonimmune-related
AK5	-1.72143	5.1397	43.3801	2.97803e-10	Nonimmune-related
MARCHF4	-1.72362	1.92478	50.1336	1.69073e-11	Nonimmune-related
PCDHA5	-1.72433	0.609818	53.5668	4.04309e-12	Nonimmune-related
ELFN2	-1.72521	4.73145	43.3109	3.06815e-10	Nonimmune-related
PTPRT	-1.72621	4.19846	41.0765	8.06786e-10	Nonimmune-related
COL24A1	-1.72851	1.29119	36.9244	4.98392e-09	Nonimmune-related
REPS2	-1.73017	4.0565	74.8807	8.40866e-16	Nonimmune-related
CA7	-1.73294	-0.0421869	45.5582	1.17003e-10	Nonimmune-related
SLC35F3	-1.73354	0.939294	46.0995	9.29399e-11	Nonimmune-related
SYCE1	-1.7357	0.0654621	34.5047	1.46226e-08	Nonimmune-related
TMEM155	-1.73578	1.96788	42.2277	4.89703e-10	Nonimmune-related
SPX	-1.7369	4.50483	29.79	1.2323e-07	Nonimmune-related
CPNE9	-1.74295	0.475363	69.7219	6.15099e-15	Nonimmune-related
CRYM	-1.74305	3.88873	29.4201	1.45951e-07	Nonimmune-related
IRX2	-1.74501	1.30256	16.3648	7.11346e-05	Nonimmune-related
KL	-1.74882	1.04785	61.5147	1.58412e-13	Cytokines
PRMT8	-1.74947	1.77819	53.8735	3.56669e-12	Nonimmune-related
SLC29A1	-1.75055	6.41009	72.6283	1.99924e-15	Nonimmune-related
HTR2A	-1.75247	2.14057	51.1504	1.10501e-11	Nonimmune-related
SCN2B	-1.75393	4.07404	69.7431	6.12301e-15	Nonimmune-related
CCK	-1.75418	3.66302	28.9438	1.81569e-07	Cytokines
DOC2B	-1.7552	3.53433	68.1249	1.15279e-14	Nonimmune-related
AGAP2	-1.75539	7.07948	45.5669	1.16633e-10	Nonimmune-related
CNTN4	-1.75626	1.80555	75.6453	6.25633e-16	Nonimmune-related
FAM160A1	-1.7565	-0.849067	45.6007	1.1489e-10	Nonimmune-related
HES5	-1.76023	2.48942	39.8169	1.39694e-09	Nonimmune-related
FAM153B	-1.7631	0.237417	30.4465	9.13262e-08	Nonimmune-related
KRT8	-1.76658	1.487	32.8548	3.06687e-08	Nonimmune-related
CRHR1	-1.76662	1.00552	56.1985	1.36925e-12	Cytokine_Receptors
CCNO	-1.7713	1.32655	45.955	9.88431e-11	Nonimmune-related
C1QL2	-1.77239	1.77578	32.9964	2.87735e-08	Nonimmune-related
NEGR1	-1.77324	4.30371	62.105	1.25307e-13	Nonimmune-related
FXYD7	-1.77624	3.32465	51.4836	9.61602e-12	Nonimmune-related
CYP26B1	-1.77766	2.87267	62.6116	1.02306e-13	Nonimmune-related
GJD2	-1.78001	-0.897435	37.6038	3.69145e-09	Nonimmune-related
PRPH2	-1.78111	0.146276	67.3475	1.55885e-14	Nonimmune-related
MAP3K9	-1.78225	3.14614	84.0483	2.64921e-17	Nonimmune-related
SYT16	-1.78523	3.63466	63.5209	7.11595e-14	Nonimmune-related
UNC5A	-1.78777	3.82751	65.9328	2.73209e-14	Nonimmune-related
SH2D5	-1.7895	2.31586	56.7526	1.09272e-12	Nonimmune-related
DUSP9	-1.79241	0.667026	58.7613	4.81517e-13	Nonimmune-related
CCDC85A	-1.79844	2.01764	60.945	1.99634e-13	Nonimmune-related
B4GALNT1	-1.79888	6.47067	51.2113	1.0773e-11	Nonimmune-related
BSN	-1.79933	5.29046	90.1425	2.81716e-18	Nonimmune-related
KCNJ4	-1.7999	3.0621	49.2753	2.42423e-11	Nonimmune-related
STMN2	-1.79994	6.13982	39.1272	1.88917e-09	Nonimmune-related
SPTBN2	-1.80046	5.6061	109.949	2.5888e-21	Nonimmune-related
CALY	-1.80536	3.28995	31.5706	5.47941e-08	Nonimmune-related
RGS8	-1.80654	2.8516	63.2964	7.78239e-14	Nonimmune-related
ATP1A3	-1.80984	7.2738	60.9062	2.02775e-13	Nonimmune-related
FRRS1L	-1.81183	4.32101	65.2279	3.61097e-14	Nonimmune-related
DGKK	-1.81296	-0.217738	37.2914	4.2374e-09	Nonimmune-related
ST8SIA2	-1.81301	1.8426	28.4385	2.29022e-07	Nonimmune-related
GABRB3	-1.81352	4.6173	48.3453	3.58691e-11	Nonimmune-related
SLITRK4	-1.81357	2.3983	41.2575	7.45753e-10	Nonimmune-related
TUNAR	-1.81436	1.30582	37.3131	4.197e-09	Nonimmune-related
CPNE7	-1.81939	1.47775	53.146	4.81912e-12	Nonimmune-related
RANBP17	-1.82005	0.172765	66.6507	2.05117e-14	Nonimmune-related
CARMIL2	-1.82635	1.99489	76.4068	4.68692e-16	Nonimmune-related
NRXN3	-1.82874	4.09122	73.5121	1.42207e-15	Nonimmune-related
SLC1A6	-1.83419	1.30503	30.9936	7.12e-08	Nonimmune-related
FGF13	-1.83707	3.38185	52.1018	7.43349e-12	Cytokines
ADARB2	-1.84087	3.50131	50.9528	1.20009e-11	Nonimmune-related
ESPN	-1.84233	0.811943	36.2963	6.58306e-09	Nonimmune-related
FBXL16	-1.84775	6.41199	80.1015	1.1586e-16	Nonimmune-related
RIMBP2	-1.84977	3.35267	57.5207	7.98721e-13	Nonimmune-related
SPHKAP	-1.85057	2.03061	42.0654	5.25335e-10	Nonimmune-related
L1CAM	-1.85208	4.97413	48.0517	4.06037e-11	Nonimmune-related
KCNA1	-1.85258	2.43789	55.9832	1.49713e-12	Nonimmune-related
ARHGAP28	-1.85476	1.42018	48.4366	3.45135e-11	Nonimmune-related
CLEC2L	-1.85553	1.51121	41.5834	6.47369e-10	Nonimmune-related
KCNJ3	-1.85774	2.83153	38.4042	2.59487e-09	Nonimmune-related
GDA	-1.8611	4.30992	35.6686	8.70056e-09	Nonimmune-related
SIX2	-1.86257	0.474579	45.5092	1.19541e-10	Nonimmune-related
SYNGR3	-1.86447	3.8548	63.3908	7.4946e-14	Nonimmune-related
GABRA4	-1.87152	2.66052	37.9231	3.20679e-09	Nonimmune-related
VIP	-1.87742	0.411325	53.0782	4.95486e-12	Cytokines
ADGRG2	-1.87861	0.908281	36.9596	4.90673e-09	Nonimmune-related
GRM5	-1.87873	2.97294	34.3584	1.56116e-08	Nonimmune-related
ADAM11	-1.88034	3.45704	108.75	3.90534e-21	Nonimmune-related
SLC32A1	-1.88405	2.27847	35.3042	1.02332e-08	Nonimmune-related
SYNPR	-1.88519	3.44646	34.2942	1.60667e-08	Nonimmune-related
HECW1	-1.88542	2.82096	60.1364	2.76538e-13	Nonimmune-related
KANK4	-1.8856	0.413094	41.0265	8.24503e-10	Nonimmune-related
NEURL1	-1.88755	3.41099	72.0192	2.52976e-15	Nonimmune-related
KSR2	-1.88786	2.24605	38.7019	2.27672e-09	Nonimmune-related
CCKBR	-1.89063	0.997367	41.254	7.46889e-10	Nonimmune-related
CCSER1	-1.89128	-1.04906	62.9995	8.73863e-14	Nonimmune-related
KIF5A	-1.89228	7.95621	74.7607	8.8044e-16	Nonimmune-related
SST	-1.89388	2.4913	37.1175	4.57594e-09	Cytokines
SNCG	-1.89404	3.60323	59.9385	2.99535e-13	Nonimmune-related
JAKMIP1	-1.90113	3.57839	71.5835	2.9945e-15	Nonimmune-related
RIMS1	-1.90372	3.22801	65.2021	3.6481e-14	Nonimmune-related
EPN3	-1.90416	-0.994281	60.9175	2.01403e-13	Nonimmune-related
PDE2A	-1.91156	4.97616	89.1254	4.08235e-18	Nonimmune-related
RASL11B	-1.92004	3.23605	67.1839	1.66824e-14	Nonimmune-related
SOSTDC1	-1.92307	0.589783	49.9261	1.84441e-11	Nonimmune-related
DLGAP3	-1.92525	3.15242	82.3334	5.01779e-17	Nonimmune-related
PPP2R2C	-1.92846	5.33756	57.0991	9.48539e-13	Nonimmune-related
GABRD	-1.93092	3.53942	62.2138	1.1996e-13	Nonimmune-related
SNCB	-1.93552	5.19122	49.5111	2.19543e-11	Nonimmune-related
FRMPD2	-1.93654	1.14592	55.284	1.99467e-12	Nonimmune-related
GRIN3A	-1.94419	1.42358	94.0452	6.82158e-19	Nonimmune-related
SHANK1	-1.9463	3.78918	67.1536	1.68825e-14	Nonimmune-related
TLL1	-1.94662	0.186357	45.2927	1.31119e-10	Nonimmune-related
CHRNA4	-1.9486	2.88943	51.4064	9.93078e-12	Nonimmune-related
LRFN2	-1.95002	1.35371	60.8448	2.07849e-13	Nonimmune-related
PNMA3	-1.9522	3.14308	86.9364	9.10856e-18	Nonimmune-related
LRRC7	-1.95472	2.43891	81.4164	7.0715e-17	Nonimmune-related
SAMD11	-1.95859	1.9458	54.1742	3.1502e-12	Nonimmune-related
SPTB	-1.9624	2.95534	67.2613	1.6182e-14	Nonimmune-related
EPHA10	-1.96348	1.83929	65.7239	2.96732e-14	Nonimmune-related
NEUROD2	-1.96398	2.53368	41.2049	7.6298e-10	Nonimmune-related
ARHGAP44	-1.96667	3.21043	87.6216	7.08086e-18	Nonimmune-related
BARX1	-1.96685	0.242772	25.4545	9.13205e-07	Nonimmune-related
GLS2	-1.96757	1.39948	65.9074	2.7589e-14	Nonimmune-related
RSPO3	-1.96904	-0.162773	44.7504	1.6535e-10	Nonimmune-related
NSG2	-1.97132	6.0522	49.9628	1.81626e-11	Nonimmune-related
SYT4	-1.97233	3.89368	43.8543	2.42852e-10	Nonimmune-related
DLL1	-1.97387	5.20969	87.777	6.68839e-18	Nonimmune-related
BHLHE22	-1.97596	0.683378	40.7094	9.46466e-10	Nonimmune-related
RGS7BP	-1.981	2.65849	88.3052	5.51082e-18	Nonimmune-related
TMEM151B	-1.98124	4.52479	82.364	4.96088e-17	Nonimmune-related
CAMK1G	-1.98634	2.83526	52.0661	7.5448e-12	Nonimmune-related
XKR7	-1.98826	1.22224	43.8194	2.46521e-10	Nonimmune-related
WDR72	-1.98866	0.155229	25.1739	1.04119e-06	Nonimmune-related
SLC7A4	-1.99198	0.159081	58.1611	6.15258e-13	Nonimmune-related
SLITRK1	-1.99239	3.3825	65.2522	3.57643e-14	Nonimmune-related
AJAP1	-1.99837	3.24575	78.4613	2.15146e-16	Nonimmune-related
PVALB	-2.00085	0.545749	34.8469	1.25489e-08	Nonimmune-related
NELL1	-2.00426	2.42229	49.3244	2.37463e-11	Nonimmune-related
PHYHIP	-2.0085	5.86787	64.0035	5.8715e-14	Nonimmune-related
ECEL1	-2.01218	1.7871	24.9115	1.17727e-06	Nonimmune-related
SLC6A15	-2.01297	2.56702	54.5211	2.73031e-12	Nonimmune-related
CRHR2	-2.01628	-1.13922	52.2047	7.12137e-12	Cytokine_Receptors
SLC4A5	-2.01682	1.79776	91.8936	1.48726e-18	Nonimmune-related
SLC17A6	-2.01784	1.26339	33.5539	2.23928e-08	Nonimmune-related
GPR83	-2.0225	0.965365	51.1692	1.09639e-11	Nonimmune-related
CNTN3	-2.02745	1.54748	57.1262	9.38121e-13	Nonimmune-related
ELAVL2	-2.02824	3.19245	66.6236	2.08014e-14	Nonimmune-related
TMEM171	-2.03135	-0.412425	54.1556	3.17446e-12	Nonimmune-related
RAB3B	-2.03272	3.15639	87.9486	6.28035e-18	Nonimmune-related
CNTNAP2	-2.03655	4.41809	71.1859	3.49353e-15	Nonimmune-related
PABPC1L2B	-2.03745	0.340092	43.5115	2.81429e-10	Nonimmune-related
WIF1	-2.0415	2.64794	26.1916	6.47673e-07	Nonimmune-related
NPM2	-2.0441	1.76603	75.9422	5.60379e-16	Nonimmune-related
SCRT1	-2.04734	2.69496	56.0406	1.46233e-12	Nonimmune-related
HMGA2	-2.04978	2.89143	26.5748	5.41996e-07	Nonimmune-related
CDR1	-2.04985	-0.510983	49.2763	2.42314e-11	Nonimmune-related
PCSK2	-2.05128	4.18087	43.5017	2.82614e-10	Antimicrobials
RAB3A	-2.05242	5.03188	110.634	2.04795e-21	Nonimmune-related
SHANK2	-2.05393	3.43844	71.6819	2.88254e-15	Nonimmune-related
HOOK1	-2.05414	0.95668	66.6148	2.08645e-14	Nonimmune-related
CHGA	-2.05716	4.65823	41.4315	6.91476e-10	Cytokines
SCN3B	-2.05782	5.21957	82.739	4.31293e-17	Nonimmune-related
MAP7D2	-2.0611	3.11467	63.9981	5.88426e-14	Nonimmune-related
WFIKKN2	-2.06151	2.4978	37.1824	4.44645e-09	Nonimmune-related
TLX1	-2.06501	0.548665	25.5518	8.72647e-07	Nonimmune-related
RTN4RL1	-2.06662	2.0846	66.8603	1.89491e-14	Nonimmune-related
ANO3	-2.06693	1.79854	66.8864	1.87547e-14	Nonimmune-related
GAD2	-2.07203	3.25968	43.6126	2.69443e-10	Nonimmune-related
GPR22	-2.08091	1.02631	51.1994	1.08265e-11	Nonimmune-related
HIPK4	-2.08447	-0.615555	70.304	4.91057e-15	Nonimmune-related
NPR3	-2.08543	1.73735	65.1895	3.66638e-14	Cytokine_Receptors
CPAMD8	-2.08568	2.92041	38.9168	2.07177e-09	Nonimmune-related
EPHA6	-2.09044	-0.671626	39.843	1.38111e-09	Nonimmune-related
TBR1	-2.09228	2.63427	55.4966	1.82788e-12	Nonimmune-related
GABRG3	-2.09273	1.09633	46.8448	6.76979e-11	Nonimmune-related
PHF24	-2.09353	4.38651	69.5726	6.54383e-15	Nonimmune-related
GABRG2	-2.09493	3.74105	39.4662	1.62854e-09	Nonimmune-related
WNT10B	-2.09845	1.09161	60.944	1.9972e-13	Nonimmune-related
SNAP25	-2.10405	7.56277	63.9619	5.96961e-14	Nonimmune-related
PABPC1L2A	-2.10417	0.261899	45.8148	1.04932e-10	Nonimmune-related
CPNE6	-2.11489	4.41816	48.4755	3.39516e-11	Nonimmune-related
CDH8	-2.12334	2.59101	85.0071	1.85652e-17	Nonimmune-related
RXFP1	-2.12335	0.655459	62.6128	1.02257e-13	Cytokine_Receptors
GLT1D1	-2.12456	2.17184	80.3722	1.04642e-16	Nonimmune-related
GNB3	-2.12589	2.8098	81.7169	6.31879e-17	Nonimmune-related
FSTL4	-2.12991	1.72648	65.7594	2.92593e-14	Nonimmune-related
SMYD1	-2.13147	-0.171151	57.2311	8.98812e-13	Nonimmune-related
GPR61	-2.13579	0.685884	103.358	2.51255e-20	Nonimmune-related
TMEM272	-2.13707	0.268107	62.2544	1.18028e-13	Nonimmune-related
GABRA5	-2.1434	3.15078	40.1816	1.1913e-09	Nonimmune-related
SNAP91	-2.15118	4.95185	66.2333	2.42634e-14	Nonimmune-related
CRABP1	-2.15518	3.28181	29.2318	1.59105e-07	Antimicrobials
FAM163B	-2.15556	2.70069	48.3889	3.52147e-11	Nonimmune-related
KCNJ12	-2.15902	0.717974	77.2817	3.36041e-16	Nonimmune-related
CHRNA2	-2.15913	-0.247387	48.4939	3.36896e-11	Nonimmune-related
SERTM1	-2.16005	1.38507	48.2059	3.80441e-11	Nonimmune-related
INA	-2.16383	4.53167	53.9103	3.51288e-12	Nonimmune-related
TAFA2	-2.1657	2.46847	115.771	3.58572e-22	Antimicrobials
SLC17A7	-2.16622	6.63489	36.983	4.85632e-09	Nonimmune-related
TMEM130	-2.16628	5.21199	60.0262	2.89107e-13	Nonimmune-related
TAFA1	-2.16885	1.54222	60.5976	2.29611e-13	Antimicrobials
RELN	-2.17022	3.54364	54.0299	3.34351e-12	Nonimmune-related
PPP4R4	-2.17157	2.39799	77.6797	2.89296e-16	Nonimmune-related
SYN2	-2.17167	5.53085	46.44	8.0404e-11	Nonimmune-related
RIMS2	-2.1729	2.96856	64.8646	4.17032e-14	Nonimmune-related
CAMKV	-2.17413	4.61526	69.7296	6.15522e-15	Nonimmune-related
LRFN5	-2.17585	1.97334	64.6848	4.47874e-14	Nonimmune-related
CELF4	-2.18057	4.15092	64.9791	3.9852e-14	Nonimmune-related
PCLO	-2.18385	3.75169	81.0041	8.25344e-17	Nonimmune-related
KCNS2	-2.18647	0.717621	54.0497	3.31633e-12	Nonimmune-related
PAK5	-2.19243	2.27062	58.3893	5.60971e-13	TCRsignalingPathway
CKMT1B	-2.19346	3.26166	69.4302	6.91779e-15	Nonimmune-related
NEFH	-2.19353	3.78876	95.5099	4.05751e-19	Nonimmune-related
RASGRF1	-2.1957	4.08459	72.0092	2.53955e-15	Nonimmune-related
ST8SIA3	-2.19675	4.2926	55.0202	2.22316e-12	Nonimmune-related
HS6ST3	-2.19793	3.57049	73.188	1.61108e-15	Nonimmune-related
CBLN2	-2.20352	1.85082	49.4889	2.21602e-11	Nonimmune-related
OLFM3	-2.20411	1.6701	63.9125	6.08823e-14	Nonimmune-related
SLC30A3	-2.20981	2.72098	56.0948	1.43021e-12	Nonimmune-related
CDH18	-2.2103	1.55458	53.7787	3.70904e-12	Nonimmune-related
NRGN	-2.21935	6.66407	73.341	1.51892e-15	Nonimmune-related
COL26A1	-2.23664	2.40118	63.9032	6.11067e-14	Nonimmune-related
CKMT1A	-2.24727	2.96684	70.5981	4.38936e-15	Nonimmune-related
KHDRBS2	-2.24887	-0.321192	84.635	2.12418e-17	Nonimmune-related
DLGAP2	-2.25287	1.72682	59.1268	4.15926e-13	Nonimmune-related
AVIL	-2.26319	5.06196	58.5786	5.19458e-13	Nonimmune-related
SLC6A17	-2.26821	4.66096	63.8837	6.15838e-14	Nonimmune-related
CDH9	-2.26863	-0.00508931	51.7359	8.65652e-12	Nonimmune-related
KCTD16	-2.26867	2.79446	105.199	1.33206e-20	Nonimmune-related
SHISAL1	-2.27245	3.63175	62.1537	1.22884e-13	Nonimmune-related
CACNA1I	-2.28559	2.13383	80.3252	1.06509e-16	Nonimmune-related
MTUS2	-2.28576	0.86242	101.053	5.64777e-20	Nonimmune-related
EMX1	-2.28879	1.14687	60.8315	2.08971e-13	Nonimmune-related
RAB3C	-2.29153	4.29055	72.1966	2.36205e-15	Nonimmune-related
KCNC2	-2.30492	3.02785	46.5529	7.66376e-11	Nonimmune-related
NGB	-2.30632	0.93052	56.5389	1.1925e-12	Nonimmune-related
GJB6	-2.31037	3.10327	34.7783	1.29393e-08	Nonimmune-related
CABP1	-2.31541	3.395	84.8024	2.00277e-17	Nonimmune-related
SYT1	-2.31559	6.57291	69.2696	7.36543e-15	Nonimmune-related
KCNT1	-2.32246	2.48554	69.0875	7.90852e-15	Nonimmune-related
PLPPR3	-2.32674	2.0877	60.084	2.82445e-13	Nonimmune-related
CACNG2	-2.33141	0.289618	60.8501	2.0741e-13	Nonimmune-related
CNNM1	-2.33268	2.01058	78.0002	2.56193e-16	Nonimmune-related
SYT13	-2.33588	4.27014	60.8841	2.04593e-13	Nonimmune-related
SSTR3	-2.33903	0.15599	62.549	1.04899e-13	Nonimmune-related
IQSEC3	-2.3414	3.9064	87.1248	8.49875e-18	Nonimmune-related
MAL2	-2.3519	2.63722	49.2344	2.46623e-11	Nonimmune-related
CPLX2	-2.36102	6.59935	54.284	3.01068e-12	Nonimmune-related
ADTRP	-2.3682	0.17347	54.4639	2.7954e-12	Nonimmune-related
VSNL1	-2.37278	5.90339	57.5794	7.79857e-13	Nonimmune-related
CREG2	-2.37561	4.28032	62.4372	1.097e-13	Nonimmune-related
CBLN1	-2.37884	1.03866	57.17	9.21505e-13	Nonimmune-related
HTR5A	-2.37889	0.399413	53.1418	4.82742e-12	Nonimmune-related
UNC13C	-2.38029	2.29955	57.9715	6.64802e-13	Nonimmune-related
JPH3	-2.38973	4.32314	74.8424	8.533e-16	Nonimmune-related
SLC12A5	-2.40337	4.76537	98.3081	1.49682e-19	Nonimmune-related
LRTM2	-2.40443	1.74271	52.3562	6.68768e-12	Nonimmune-related
HRH3	-2.40987	1.85721	59.9646	2.96396e-13	Nonimmune-related
SLC8A2	-2.41423	3.89963	67.5582	1.43997e-14	Nonimmune-related
PTGER3	-2.4263	-0.272211	70.8092	4.04364e-15	Cytokine_Receptors
DOK6	-2.43373	3.26237	119.836	9.20954e-23	Nonimmune-related
C1QL3	-2.43494	1.6513	52.446	6.44279e-12	Nonimmune-related
C4orf50	-2.43643	-0.196105	79.1008	1.68945e-16	Nonimmune-related
CYP24A1	-2.44339	-0.161665	66.6369	2.06923e-14	Nonimmune-related
SULT4A1	-2.44827	4.41631	70.7293	4.17105e-15	Nonimmune-related
FRMPD4	-2.45276	2.23638	72.1287	2.42488e-15	Nonimmune-related
HPSE2	-2.45695	1.93366	55.7307	1.66047e-12	Nonimmune-related
SCUBE1	-2.46275	0.553755	71.094	3.62041e-15	Nonimmune-related
FSTL5	-2.46344	1.74802	86.0269	1.27349e-17	Nonimmune-related
FAT2	-2.4835	0.171309	79.4347	1.48949e-16	Nonimmune-related
RBFOX1	-2.48679	3.87654	73.6545	1.34628e-15	Nonimmune-related
KRT222	-2.49437	0.898808	55.9986	1.4877e-12	Nonimmune-related
GALNTL6	-2.49505	-0.0715172	92.056	1.40439e-18	Nonimmune-related
KLK7	-2.50935	0.22773	40.8288	8.9855e-10	Nonimmune-related
AMER3	-2.51183	1.51901	73.3683	1.50303e-15	Nonimmune-related
GABRA1	-2.51694	4.00112	51.9564	7.89708e-12	Nonimmune-related
SLC1A7	-2.53033	1.35163	78.3549	2.23988e-16	Nonimmune-related
CHRM1	-2.55354	3.23744	72.6778	1.96139e-15	Nonimmune-related
ATP8A2	-2.55521	3.44596	88.7987	4.60018e-18	Nonimmune-related
CPLX3	-2.55856	1.24443	70.828	4.01428e-15	Nonimmune-related
GPR26	-2.55881	0.224633	50.1215	1.69937e-11	Nonimmune-related
BEND4	-2.56559	-0.164352	76.1556	5.16557e-16	Nonimmune-related
EBF3	-2.569	1.48298	53.2079	4.69704e-12	Nonimmune-related
SOWAHB	-2.57567	-0.355662	98.0818	1.61885e-19	Nonimmune-related
WSCD2	-2.57821	2.29465	69.1883	7.60311e-15	Nonimmune-related
CACNA1B	-2.57953	2.74873	74.9523	8.18145e-16	Nonimmune-related
EGR4	-2.58304	0.387267	56.0408	1.46221e-12	Nonimmune-related
KLHL1	-2.60532	-1.0659	66.4618	2.21715e-14	Nonimmune-related
STYK1	-2.60597	0.157299	75.2082	7.41793e-16	Nonimmune-related
CAMK2A	-2.61247	6.64573	76.9214	3.85873e-16	Nonimmune-related
TCERG1L	-2.61871	0.0507663	74.9018	8.34112e-16	Nonimmune-related
CCBE1	-2.62716	-0.330547	64.2157	5.39623e-14	Nonimmune-related
CDH12	-2.62944	-0.194402	76.7584	4.10568e-16	Nonimmune-related
RYR2	-2.6392	2.88053	80.2885	1.0799e-16	Nonimmune-related
SV2B	-2.64363	4.75472	68.096	1.16593e-14	Nonimmune-related
DLK1	-2.65181	3.52493	29.5877	1.35175e-07	Nonimmune-related
RBFOX3	-2.65608	3.46752	77.4402	3.16833e-16	Nonimmune-related
PNMA5	-2.67197	0.530182	76.1042	5.26781e-16	Nonimmune-related
SVOP	-2.6887	3.68124	76.9998	3.74549e-16	Nonimmune-related
PCDH11Y	-2.69083	0.226699	52.1615	7.25121e-12	Nonimmune-related
PACSIN1	-2.6961	5.43056	73.7098	1.31792e-15	Nonimmune-related
DAPL1	-2.69788	2.31301	45.7961	1.05768e-10	Nonimmune-related
MYT1L	-2.72983	3.85923	78.9554	1.78485e-16	Nonimmune-related
FREM3	-2.73362	0.225232	55.5564	1.78354e-12	Nonimmune-related
CHD5	-2.73592	4.42563	91.7139	1.59201e-18	Nonimmune-related
GABRB2	-2.73752	3.8069	85.2267	1.71158e-17	Nonimmune-related
SOHLH1	-2.74396	-0.0263337	72.6901	1.95207e-15	Nonimmune-related
HCN1	-2.74411	1.96033	71.382	3.23773e-15	Nonimmune-related
PRND	-2.76049	0.74653	59.6005	3.43371e-13	Nonimmune-related
TRHDE	-2.76481	1.32567	72.8903	1.80699e-15	Nonimmune-related
DDN	-2.79234	4.62536	83.4461	3.31392e-17	Nonimmune-related
PRKCG	-2.81791	3.51835	80.3442	1.05752e-16	NaturalKiller_Cell_Cytotoxicity
SYT2	-2.81931	1.77001	85.5202	1.53557e-17	Nonimmune-related
GRIN1	-2.81954	5.3052	64.6534	4.535e-14	Nonimmune-related
CHRM2	-2.85206	-0.315704	107.135	6.81187e-21	Nonimmune-related
KCNV1	-2.85586	1.75573	58.3271	5.7531e-13	Nonimmune-related
CACNG3	-2.86878	2.84772	63.2255	8.00563e-14	Nonimmune-related
TMEM132D	-2.87282	1.79758	81.192	7.69189e-17	Nonimmune-related
GRIN2B	-2.87979	3.92584	106.892	7.40931e-21	Nonimmune-related
MPPED1	-2.88352	2.94262	92.3651	1.2577e-18	Nonimmune-related
GRM4	-2.88715	0.709513	100.259	7.50715e-20	Nonimmune-related
PNMA6F	-2.89608	0.257721	61.1738	1.82084e-13	Nonimmune-related
ATP2B3	-2.90047	2.95202	100.598	6.66004e-20	Nonimmune-related
SLC6A7	-2.92234	1.78482	69.0488	8.02912e-15	Nonimmune-related
SFRP5	-2.92407	2.08429	45.0608	1.44781e-10	Nonimmune-related
CUX2	-2.97354	2.40101	99.326	1.04364e-19	Nonimmune-related
CLIC6	-3.03526	2.45238	73.9873	1.18458e-15	Nonimmune-related
PDE6A	-3.03573	0.752043	92.2799	1.29707e-18	Nonimmune-related
SSTR1	-3.0408	1.96756	89.5548	3.49013e-18	Cytokine_Receptors
KCNH5	-3.07079	1.63958	84.1349	2.56538e-17	Nonimmune-related
NWD2	-3.11561	0.378284	90.3092	2.65131e-18	Nonimmune-related
SLC38A4	-3.12719	0.697471	67.3264	1.57731e-14	Nonimmune-related
PRLR	-3.20276	1.49367	92.9247	1.02754e-18	Cytokine_Receptors
NEFM	-3.20999	5.03939	87.0659	8.68491e-18	Nonimmune-related
TESPA1	-3.31135	2.74341	115.892	3.44469e-22	Nonimmune-related
NEUROD6	-3.6818	0.858854	100.073	8.01709e-20	Nonimmune-related
OCA2	-3.89509	0.402839	121.082	6.0895e-23	Nonimmune-related
SLC13A4	-4.17397	3.89542	164.946	6.93418e-29	Nonimmune-related
PRLHR	-4.3914	0.894329	148.222	1.0581e-26	Cytokine_Receptors
GRP	-4.69963	1.87206	139.119	1.79588e-25	Cytokines
ABCA4	-4.87853	2.90482	192.301	2.90317e-32	Nonimmune-related
HTR2C	-5.59456	2.6808	163.968	9.2492e-29	Nonimmune-related
