# Supplementary material for: CARD-Associated Risk Score Features the Immune Landscape and Predicts the Responsiveness to Anti-PD-1 Therapy in IDH Wild-Type Gliomas
Source: Front Cell Dev Biol. 2021 Mar 19;9:653240. doi: 10.3389/fcell.2021.653240 (PMC8009185; doi:10.3389/fcell.2021.653240)
Supplement: Supplementary file 5 [file Data_Sheet_3.XLSX]

## Sheet: GSEA enrichment in CL1
NAME	SIZE	ES	NES	NOM p-val	FDR q-val	FWER p-val	RANK AT MAX	LEADING EDGE
REACTOME_IMMUNOREGULATORY_INTERACTIONS_BETWEEN_A_LYMPHOID_AND_A_NON_LYMPHOID_CELL	105	0.82461	2.549	0	0	0	1481	tags=62%, list=9%, signal=68%
KEGG_CYTOKINE_CYTOKINE_RECEPTOR_INTERACTION	183	0.741606	2.4822	0	0	0	1806	tags=54%, list=11%, signal=60%
KEGG_HEMATOPOIETIC_CELL_LINEAGE	67	0.819038	2.42273	0	0	0	1909	tags=66%, list=12%, signal=74%
KEGG_LEISHMANIA_INFECTION	66	0.829255	2.42258	0	0	0	1005	tags=55%, list=6%, signal=58%
REACTOME_INTERFERON_SIGNALING	179	0.725652	2.4135	0	0	0	1435	tags=42%, list=9%, signal=46%
KEGG_ANTIGEN_PROCESSING_AND_PRESENTATION	59	0.837474	2.41114	0	0	0	971	tags=54%, list=6%, signal=58%
REACTOME_INTERFERON_GAMMA_SIGNALING	85	0.783054	2.3707	0	0	0	1062	tags=59%, list=7%, signal=63%
REACTOME_INTERFERON_ALPHA_BETA_SIGNALING	55	0.841861	2.34711	0	0	0	1426	tags=71%, list=9%, signal=78%
REACTOME_INTERLEUKIN_10_SIGNALING	43	0.86518	2.343	0	0	0	1806	tags=74%, list=11%, signal=84%
REACTOME_ANTIGEN_PROCESSING_CROSS_PRESENTATION	97	0.755227	2.31799	0	0	0	2360	tags=56%, list=15%, signal=65%
REACTOME_INTERLEUKIN_4_AND_INTERLEUKIN_13_SIGNALING	94	0.743215	2.30019	0	0	0	1863	tags=48%, list=12%, signal=54%
KEGG_ALLOGRAFT_REJECTION	28	0.905391	2.29734	0	0	0	1090	tags=86%, list=7%, signal=92%
KEGG_VIRAL_MYOCARDITIS	61	0.783997	2.28028	0	0	0	1090	tags=44%, list=7%, signal=47%
KEGG_GRAFT_VERSUS_HOST_DISEASE	29	0.897097	2.27666	0	0	0	1005	tags=83%, list=6%, signal=88%
REACTOME_CHEMOKINE_RECEPTORS_BIND_CHEMOKINES	41	0.833016	2.26929	0	0	0	1543	tags=61%, list=10%, signal=67%
KEGG_INTESTINAL_IMMUNE_NETWORK_FOR_IGA_PRODUCTION	36	0.849676	2.26743	0	0	0	1554	tags=75%, list=10%, signal=83%
KEGG_SYSTEMIC_LUPUS_ERYTHEMATOSUS	82	0.752414	2.25926	0	0	0	1090	tags=35%, list=7%, signal=38%
KEGG_AUTOIMMUNE_THYROID_DISEASE	29	0.888242	2.23447	0	0	0	1090	tags=86%, list=7%, signal=92%
KEGG_LYSOSOME	116	0.694984	2.21314	0	0	0	2129	tags=47%, list=13%, signal=53%
REACTOME_DAP12_INTERACTIONS	37	0.837123	2.1839	0	0	0	755	tags=46%, list=5%, signal=48%
KEGG_TYPE_I_DIABETES_MELLITUS	36	0.810499	2.17199	0	0	0	1005	tags=64%, list=6%, signal=68%
REACTOME_CELL_SURFACE_INTERACTIONS_AT_THE_VASCULAR_WALL	111	0.686886	2.16307	0	0	0	2228	tags=47%, list=14%, signal=54%
KEGG_TOLL_LIKE_RECEPTOR_SIGNALING_PATHWAY	86	0.705103	2.16126	0	0	0	1906	tags=49%, list=12%, signal=55%
PID_TCR_PATHWAY	65	0.740883	2.15283	0	0	0	1591	tags=51%, list=10%, signal=56%
KEGG_COMPLEMENT_AND_COAGULATION_CASCADES	46	0.782477	2.13512	0	0	0	1876	tags=54%, list=12%, signal=61%
REACTOME_TCR_SIGNALING	114	0.674645	2.13159	0	0	0	2436	tags=47%, list=15%, signal=56%
REACTOME_COMPLEMENT_CASCADE	36	0.810247	2.12911	0	0	0	1876	tags=58%, list=12%, signal=66%
REACTOME_INTERLEUKIN_2_FAMILY_SIGNALING	36	0.806648	2.12884	0	0	0	1509	tags=56%, list=9%, signal=61%
REACTOME_COSTIMULATION_BY_THE_CD28_FAMILY	65	0.730883	2.1239	0	0	0	1555	tags=45%, list=10%, signal=49%
REACTOME_TNFR2_NON_CANONICAL_NF_KB_PATHWAY	93	0.690145	2.12225	0	0	0	2436	tags=51%, list=15%, signal=59%
REACTOME_GENERATION_OF_SECOND_MESSENGER_MOLECULES	32	0.811674	2.11611	0	0	0	1018	tags=66%, list=6%, signal=70%
KEGG_CELL_ADHESION_MOLECULES_CAMS	116	0.67121	2.11512	0	0	0	1270	tags=39%, list=8%, signal=42%
REACTOME_TOLL_LIKE_RECEPTOR_CASCADES	147	0.637814	2.09743	0	0	0	1655	tags=37%, list=10%, signal=41%
KEGG_JAK_STAT_SIGNALING_PATHWAY	106	0.667014	2.08434	0	0	0	1778	tags=42%, list=11%, signal=46%
REACTOME_DDX58_IFIH1_MEDIATED_INDUCTION_OF_INTERFERON_ALPHA_BETA	64	0.710596	2.07366	0	0	0	1906	tags=41%, list=12%, signal=46%
REACTOME_INTERLEUKIN_3_INTERLEUKIN_5_AND_GM_CSF_SIGNALING	43	0.764496	2.07205	0	0	0	1509	tags=40%, list=9%, signal=44%
REACTOME_PD_1_SIGNALING	21	0.877508	2.06713	0	2.93e-05	0.001	1115	tags=81%, list=7%, signal=87%
KEGG_ASTHMA	18	0.912486	2.0579	0	2.85e-05	0.001	1090	tags=89%, list=7%, signal=95%
REACTOME_DISEASES_OF_IMMUNE_SYSTEM	24	0.850477	2.05463	0	2.78e-05	0.001	1591	tags=71%, list=10%, signal=79%
PID_IL12_2PATHWAY	58	0.712448	2.04256	0	2.71e-05	0.001	1328	tags=48%, list=8%, signal=52%
PID_AMB2_NEUTROPHILS_PATHWAY	36	0.758632	2.0378	0	2.64e-05	0.001	1505	tags=39%, list=9%, signal=43%
REACTOME_GPVI_MEDIATED_ACTIVATION_CASCADE	33	0.771832	2.02259	0	2.58e-05	0.001	1742	tags=55%, list=11%, signal=61%
PID_TOLL_ENDOGENOUS_PATHWAY	23	0.831858	2.02052	0	2.52e-05	0.001	2191	tags=70%, list=14%, signal=81%
KEGG_LEUKOCYTE_TRANSENDOTHELIAL_MIGRATION	97	0.651884	2.01789	0	2.46e-05	0.001	1296	tags=35%, list=8%, signal=38%
KEGG_NATURAL_KILLER_CELL_MEDIATED_CYTOTOXICITY	100	0.650032	2.01764	0	2.41e-05	0.001	1869	tags=40%, list=12%, signal=45%
BIOCARTA_COMP_PATHWAY	15	0.908595	2.01115	0	2.35e-05	0.001	258	tags=53%, list=2%, signal=54%
KEGG_CYTOSOLIC_DNA_SENSING_PATHWAY	41	0.761845	2.01062	0	2.3e-05	0.001	1906	tags=44%, list=12%, signal=50%
PID_IL23_PATHWAY	29	0.787188	2.00599	0	2.26e-05	0.001	1840	tags=66%, list=12%, signal=74%
KEGG_NOD_LIKE_RECEPTOR_SIGNALING_PATHWAY	56	0.704923	2.00444	0	2.21e-05	0.001	1655	tags=50%, list=10%, signal=56%
REACTOME_DAP12_SIGNALING	29	0.806102	2.00343	0	2.16e-05	0.001	565	tags=34%, list=4%, signal=36%
BIOCARTA_IL2RB_PATHWAY	36	0.759669	2.00231	0	2.12e-05	0.001	1509	tags=42%, list=9%, signal=46%
BIOCARTA_DEATH_PATHWAY	29	0.773639	2.001	0	2.08e-05	0.001	1413	tags=48%, list=9%, signal=53%
REACTOME_INTEGRIN_CELL_SURFACE_INTERACTIONS	77	0.663788	1.99969	0	3.98e-05	0.002	3074	tags=53%, list=19%, signal=66%
KEGG_PRIMARY_IMMUNODEFICIENCY	29	0.786385	1.99817	0	3.91e-05	0.002	2269	tags=66%, list=14%, signal=76%
BIOCARTA_INFLAM_PATHWAY	18	0.868221	1.99502	0	5.76e-05	0.003	1909	tags=78%, list=12%, signal=88%
PID_IL4_2PATHWAY	49	0.720162	1.99253	0	5.65e-05	0.003	1742	tags=37%, list=11%, signal=41%
REACTOME_TNFS_BIND_THEIR_PHYSIOLOGICAL_RECEPTORS	24	0.812741	1.99058	0	5.56e-05	0.003	2182	tags=71%, list=14%, signal=82%
KEGG_CHEMOKINE_SIGNALING_PATHWAY	161	0.605302	1.98647	0	7.31e-05	0.004	1682	tags=37%, list=11%, signal=41%
REACTOME_NUCLEOTIDE_BINDING_DOMAIN_LEUCINE_RICH_REPEAT_CONTAINING_RECEPTOR_NLR_SIGNALING_PATHWAYS	55	0.708907	1.98528	0	7.19e-05	0.004	1757	tags=36%, list=11%, signal=41%
REACTOME_RIPK1_MEDIATED_REGULATED_NECROSIS	19	0.849562	1.98108	0	7.07e-05	0.004	1372	tags=63%, list=9%, signal=69%
PID_PI3KCI_PATHWAY	47	0.721008	1.96963	0	0.000122	0.007	1300	tags=36%, list=8%, signal=39%
REACTOME_ANTIGEN_PRESENTATION_FOLDING_ASSEMBLY_AND_PEPTIDE_LOADING_OF_CLASS_I_MHC	25	0.798607	1.96778	0	0.000137	0.008	2258	tags=68%, list=14%, signal=79%
REACTOME_ANTIMICROBIAL_PEPTIDES	26	0.790152	1.96469	0	0.000168	0.01	1776	tags=58%, list=11%, signal=65%
REACTOME_INITIAL_TRIGGERING_OF_COMPLEMENT	18	0.862154	1.96332	0	0.000165	0.01	532	tags=50%, list=3%, signal=52%
PID_CD8_TCR_PATHWAY	53	0.69746	1.94873	0	0.000245	0.015	1727	tags=49%, list=11%, signal=55%
BIOCARTA_CASPASE_PATHWAY	22	0.827496	1.94545	0	0.000273	0.017	1413	tags=50%, list=9%, signal=55%
REACTOME_CROSS_PRESENTATION_OF_SOLUBLE_EXOGENOUS_ANTIGENS_ENDOSOMES	48	0.707564	1.9426	0	0.000269	0.017	2436	tags=46%, list=15%, signal=54%
PID_IL6_7_PATHWAY	44	0.70307	1.93982	0	0.000265	0.017	2399	tags=43%, list=15%, signal=51%
BIOCARTA_NFKB_PATHWAY	21	0.831473	1.93574	0	0.000307	0.02	1591	tags=62%, list=10%, signal=69%
BIOCARTA_NKT_PATHWAY	18	0.856805	1.9323	0	0.000303	0.02	1296	tags=72%, list=8%, signal=79%
REACTOME_PURINERGIC_SIGNALING_IN_LEISHMANIASIS_INFECTION	23	0.805238	1.93121	0	0.000314	0.021	1175	tags=57%, list=7%, signal=61%
REACTOME_NOD1_2_SIGNALING_PATHWAY	36	0.736073	1.9295	0	0.000309	0.021	1644	tags=33%, list=10%, signal=37%
KEGG_B_CELL_RECEPTOR_SIGNALING_PATHWAY	72	0.653565	1.92799	0	0.000319	0.022	1591	tags=35%, list=10%, signal=38%
PID_NFKAPPAB_CANONICAL_PATHWAY	22	0.79634	1.92621	0	0.000329	0.023	1591	tags=50%, list=10%, signal=55%
REACTOME_DETOXIFICATION_OF_REACTIVE_OXYGEN_SPECIES	31	0.752524	1.91655	0	0.000494	0.035	3041	tags=55%, list=19%, signal=68%
PID_INTEGRIN_CS_PATHWAY	25	0.762782	1.91404	0	0.000501	0.036	2817	tags=60%, list=18%, signal=73%
PID_INTEGRIN2_PATHWAY	22	0.796812	1.91382	0	0.000494	0.036	1863	tags=59%, list=12%, signal=67%
REACTOME_INTERLEUKIN_1_FAMILY_SIGNALING	127	0.594647	1.91341	0	0.000488	0.036	2436	tags=40%, list=15%, signal=47%
REACTOME_DNA_REPLICATION_PRE_INITIATION	82	0.622503	1.90701	0	0.000536	0.04	4467	tags=50%, list=28%, signal=69%
REACTOME_METABOLISM_OF_POLYAMINES	56	0.666559	1.90011	0	0.000636	0.048	3841	tags=55%, list=24%, signal=73%
REACTOME_ORC1_REMOVAL_FROM_CHROMATIN	69	0.649071	1.89962	0	0.000641	0.049	4467	tags=57%, list=28%, signal=78%
BIOCARTA_CTLA4_PATHWAY	18	0.835252	1.89818	0	0.000658	0.051	918	tags=61%, list=6%, signal=65%
KEGG_PATHOGENIC_ESCHERICHIA_COLI_INFECTION	50	0.671854	1.89693	0	0.00065	0.051	1198	tags=30%, list=8%, signal=32%
PID_CXCR4_PATHWAY	99	0.614488	1.89692	0	0.000643	0.051	1555	tags=34%, list=10%, signal=38%
BIOCARTA_TOB1_PATHWAY	16	0.844229	1.89426	0	0.000648	0.052	951	tags=50%, list=6%, signal=53%
REACTOME_BINDING_AND_UPTAKE_OF_LIGANDS_BY_SCAVENGER_RECEPTORS	38	0.710094	1.89055	0	0.00069	0.056	2480	tags=50%, list=16%, signal=59%
PID_FCER1_PATHWAY	57	0.665958	1.88765	0	0.000707	0.058	1591	tags=32%, list=10%, signal=35%
REACTOME_REGULATION_OF_RUNX3_EXPRESSION_AND_ACTIVITY	55	0.667974	1.88723	0	0.000699	0.058	3759	tags=56%, list=24%, signal=73%
PID_GLYPICAN_1PATHWAY	24	0.773896	1.88343	0	0.000763	0.062	1278	tags=33%, list=8%, signal=36%
REACTOME_STABILIZATION_OF_P53	55	0.655229	1.88138	0	0.000838	0.068	4467	tags=64%, list=28%, signal=88%
BIOCARTA_TH1TH2_PATHWAY	16	0.828529	1.88126	0	0.000829	0.068	1554	tags=81%, list=10%, signal=90%
KEGG_APOPTOSIS	82	0.619322	1.88033	0	0.000843	0.07	2865	tags=48%, list=18%, signal=58%
REACTOME_TOLL_LIKE_RECEPTOR_4_TLR4_CASCADE	124	0.590029	1.87564	0	0.000925	0.076	1936	tags=35%, list=12%, signal=40%
PID_CASPASE_PATHWAY	51	0.672116	1.87481	0	0.000915	0.076	1413	tags=29%, list=9%, signal=32%
PID_GMCSF_PATHWAY	34	0.712029	1.87318	0	0.000974	0.081	1691	tags=41%, list=11%, signal=46%
REACTOME_ANTIGEN_ACTIVATES_B_CELL_RECEPTOR_BCR_LEADING_TO_GENERATION_OF_SECOND_MESSENGERS	29	0.741089	1.87249	0.00175747	0.000974	0.082	836	tags=38%, list=5%, signal=40%
REACTOME_ROS_AND_RNS_PRODUCTION_IN_PHAGOCYTES	34	0.715702	1.87145	0	0.000986	0.083	441	tags=26%, list=3%, signal=27%
REACTOME_AUF1_HNRNP_D0_BINDS_AND_DESTABILIZES_MRNA	53	0.664012	1.86573	0	0.00115073	0.099	4568	tags=68%, list=29%, signal=95%
REACTOME_ASSEMBLY_OF_THE_PRE_REPLICATIVE_COMPLEX	66	0.639426	1.85657	0	0.00130166	0.111	4467	tags=53%, list=28%, signal=73%
SIG_PIP3_SIGNALING_IN_B_LYMPHOCYTES	34	0.717048	1.85611	0	0.00129891	0.112	786	tags=32%, list=5%, signal=34%
KEGG_PROTEASOME	41	0.688868	1.8528	0	0.00137051	0.12	2436	tags=44%, list=15%, signal=52%
REACTOME_TRAF6_MEDIATED_NF_KB_ACTIVATION	24	0.75812	1.8478	0.00173913	0.00155491	0.133	1591	tags=42%, list=10%, signal=46%
REACTOME_CASPASE_ACTIVATION_VIA_DEATH_RECEPTORS_IN_THE_PRESENCE_OF_LIGAND	15	0.854482	1.84733	0	0.00153981	0.133	1268	tags=73%, list=8%, signal=80%
PID_FRA_PATHWAY	36	0.690744	1.84665	0	0.00156645	0.136	2318	tags=47%, list=15%, signal=55%
PID_UPA_UPAR_PATHWAY	32	0.722835	1.84616	0	0.00156131	0.137	1840	tags=47%, list=12%, signal=53%
REACTOME_APC_C_CDH1_MEDIATED_DEGRADATION_OF_CDC20_AND_OTHER_APC_C_CDH1_TARGETED_PROTEINS_IN_LATE_MITOSIS_EARLY_G1	70	0.627823	1.84523	0	0.00155661	0.138	3759	tags=47%, list=24%, signal=61%
NABA_ECM_REGULATORS	161	0.55653	1.8415	0	0.00167096	0.15	2089	tags=32%, list=13%, signal=37%
PID_IL2_STAT5_PATHWAY	27	0.737345	1.84003	0	0.00168478	0.153	1509	tags=33%, list=9%, signal=37%
REACTOME_DNA_REPLICATION	124	0.577028	1.83979	0	0.00167903	0.154	4277	tags=40%, list=27%, signal=55%
REACTOME_SWITCHING_OF_ORIGINS_TO_A_POST_REPLICATIVE_STATE	88	0.608602	1.83867	0	0.00172299	0.159	4467	tags=50%, list=28%, signal=69%
SA_MMP_CYTOKINE_CONNECTION	15	0.834729	1.83831	0.00185529	0.00172701	0.16	1092	tags=60%, list=7%, signal=64%
KEGG_OTHER_GLYCAN_DEGRADATION	15	0.819611	1.8368	0.00186567	0.00175957	0.165	1623	tags=67%, list=10%, signal=74%
REACTOME_DEFECTIVE_CFTR_CAUSES_CYSTIC_FIBROSIS	59	0.635282	1.8332	0	0.00184832	0.174	3759	tags=54%, list=24%, signal=71%
REACTOME_IKK_COMPLEX_RECRUITMENT_MEDIATED_BY_RIP1	23	0.766899	1.83175	0	0.00190608	0.18	1591	tags=39%, list=10%, signal=43%
REACTOME_INTERLEUKIN_RECEPTOR_SHC_SIGNALING	22	0.768914	1.82918	0	0.00194387	0.184	1509	tags=45%, list=9%, signal=50%
REACTOME_TP53_REGULATES_TRANSCRIPTION_OF_CELL_DEATH_GENES	43	0.658252	1.82742	0	0.00194518	0.186	2865	tags=42%, list=18%, signal=51%
KEGG_T_CELL_RECEPTOR_SIGNALING_PATHWAY	98	0.58797	1.82567	0	0.00199199	0.193	1591	tags=33%, list=10%, signal=36%
REACTOME_PARASITE_INFECTION	58	0.642454	1.82316	0	0.00207468	0.203	1555	tags=38%, list=10%, signal=42%
REACTOME_ASYMMETRIC_LOCALIZATION_OF_PCP_PROTEINS	62	0.62478	1.82171	0	0.00213755	0.211	3759	tags=50%, list=24%, signal=65%
REACTOME_RESPONSE_TO_ELEVATED_PLATELET_CYTOSOLIC_CA2	115	0.574329	1.81188	0	0.00258929	0.251	2529	tags=38%, list=16%, signal=45%
REACTOME_RHO_GTPASES_ACTIVATE_NADPH_OXIDASES	22	0.764787	1.80948	0.00176056	0.00262068	0.257	225	tags=36%, list=1%, signal=37%
REACTOME_NICOTINAMIDE_SALVAGING	16	0.802983	1.80758	0.0017331	0.00273136	0.269	1172	tags=38%, list=7%, signal=40%
BIOCARTA_NO2IL12_PATHWAY	15	0.824877	1.80605	0.00179533	0.00277884	0.276	662	tags=60%, list=4%, signal=63%
PID_BCR_5PATHWAY	63	0.63084	1.80408	0	0.00288539	0.287	1591	tags=33%, list=10%, signal=37%
REACTOME_INTERLEUKIN_12_FAMILY_SIGNALING	50	0.641426	1.80396	0.00172414	0.00286231	0.287	2867	tags=44%, list=18%, signal=53%
REACTOME_INTERLEUKIN_1_SIGNALING	100	0.581468	1.80231	0	0.00294942	0.295	3650	tags=53%, list=23%, signal=68%
REACTOME_FCERI_MEDIATED_NF_KB_ACTIVATION	78	0.598791	1.80129	0	0.00298492	0.299	3650	tags=53%, list=23%, signal=68%
REACTOME_TNF_RECEPTOR_SUPERFAMILY_TNFSF_MEMBERS_MEDIATING_NON_CANONICAL_NF_KB_PATHWAY	15	0.809606	1.7994	0	0.00302817	0.303	1511	tags=73%, list=9%, signal=81%
REACTOME_REGULATION_OF_INSULIN_LIKE_GROWTH_FACTOR_IGF_TRANSPORT_AND_UPTAKE_BY_INSULIN_LIKE_GROWTH_FACTOR_BINDING_PROTEINS_IGFBPS	98	0.580602	1.79824	0	0.00309492	0.311	3004	tags=44%, list=19%, signal=54%
REACTOME_PLATELET_ACTIVATION_SIGNALING_AND_AGGREGATION	233	0.526142	1.79823	0	0.00307972	0.312	1742	tags=28%, list=11%, signal=31%
PID_EPO_PATHWAY	32	0.693979	1.79813	0	0.00305621	0.312	977	tags=34%, list=6%, signal=37%
REACTOME_REGULATION_OF_SIGNALING_BY_CBL	22	0.744251	1.79579	0.00175439	0.00313815	0.321	792	tags=27%, list=5%, signal=29%
REACTOME_CTLA4_INHIBITORY_SIGNALING	21	0.738207	1.79521	0.00180505	0.00313857	0.322	525	tags=24%, list=3%, signal=25%
REACTOME_CASPASE_ACTIVATION_VIA_EXTRINSIC_APOPTOTIC_SIGNALLING_PATHWAY	25	0.728025	1.78975	0	0.00345652	0.349	1268	tags=44%, list=8%, signal=48%
REACTOME_SIGNALING_BY_SCF_KIT	41	0.681792	1.78934	0	0.00343867	0.349	1569	tags=32%, list=10%, signal=35%
PID_INTEGRIN_A9B1_PATHWAY	22	0.740222	1.78929	0	0.00342116	0.35	1863	tags=55%, list=12%, signal=62%
PID_IL12_STAT4_PATHWAY	30	0.701953	1.78796	0	0.00348883	0.358	1247	tags=57%, list=8%, signal=61%
KEGG_FC_GAMMA_R_MEDIATED_PHAGOCYTOSIS	92	0.581163	1.78644	0.00157233	0.00352547	0.364	792	tags=25%, list=5%, signal=26%
PID_INTEGRIN1_PATHWAY	62	0.611669	1.78153	0.00151057	0.00381221	0.393	3080	tags=52%, list=19%, signal=64%
REACTOME_SCF_SKP2_MEDIATED_DEGRADATION_OF_P27_P21	60	0.612073	1.78082	0	0.00380767	0.394	4277	tags=60%, list=27%, signal=82%
BIOCARTA_HIVNEF_PATHWAY	55	0.61929	1.77602	0.0016	0.00415774	0.429	1672	tags=31%, list=10%, signal=34%
REACTOME_TRAF6_MEDIATED_IRF7_ACTIVATION	15	0.793236	1.77534	0.00192308	0.00416589	0.433	1906	tags=53%, list=12%, signal=61%
REACTOME_INTERLEUKIN_12_SIGNALING	42	0.645255	1.77388	0	0.00423378	0.438	2528	tags=38%, list=16%, signal=45%
REACTOME_NEGATIVE_REGULATORS_OF_DDX58_IFIH1_SIGNALING	34	0.673448	1.77122	0	0.00435974	0.452	1906	tags=38%, list=12%, signal=43%
REACTOME_FCGR3A_MEDIATED_IL10_SYNTHESIS	37	0.675339	1.77095	0	0.00432967	0.452	496	tags=27%, list=3%, signal=28%
KEGG_AMINO_SUGAR_AND_NUCLEOTIDE_SUGAR_METABOLISM	43	0.653078	1.77019	0.00168919	0.00435161	0.456	2685	tags=40%, list=17%, signal=47%
REACTOME_FCERI_MEDIATED_CA_2_MOBILIZATION	29	0.705048	1.76695	0.0017094	0.00463279	0.474	1086	tags=41%, list=7%, signal=44%
BIOCARTA_RELA_PATHWAY	15	0.809711	1.76595	0	0.00463879	0.476	1591	tags=53%, list=10%, signal=59%
KEGG_DRUG_METABOLISM_OTHER_ENZYMES	23	0.719842	1.76472	0	0.00470805	0.482	886	tags=22%, list=6%, signal=23%
REACTOME_SIGNALING_BY_THE_B_CELL_RECEPTOR_BCR	107	0.563771	1.76425	0	0.00470542	0.485	2436	tags=38%, list=15%, signal=45%
REACTOME_C_TYPE_LECTIN_RECEPTORS_CLRS	124	0.553557	1.7641	0	0.0046953	0.488	2436	tags=37%, list=15%, signal=43%
REACTOME_THE_ROLE_OF_NEF_IN_HIV_1_REPLICATION_AND_DISEASE_PATHOGENESIS	27	0.700882	1.76298	0	0.00474153	0.494	2176	tags=48%, list=14%, signal=56%
BIOCARTA_TID_PATHWAY	18	0.773063	1.7554	0	0.00535067	0.543	3118	tags=67%, list=20%, signal=83%
REACTOME_PEPTIDE_LIGAND_BINDING_RECEPTORS	121	0.548272	1.75325	0	0.00546752	0.553	1543	tags=29%, list=10%, signal=32%
PID_P53_DOWNSTREAM_PATHWAY	129	0.544438	1.75281	0	0.00548755	0.558	2737	tags=33%, list=17%, signal=40%
REACTOME_SIGNALING_BY_ERYTHROPOIETIN	24	0.731197	1.75202	0	0.00551418	0.561	1509	tags=33%, list=9%, signal=37%
REACTOME_FCGAMMA_RECEPTOR_FCGR_DEPENDENT_PHAGOCYTOSIS	85	0.576528	1.75176	0	0.0055129	0.564	1672	tags=32%, list=10%, signal=35%
REACTOME_TRANSCRIPTIONAL_REGULATION_BY_RUNX3	96	0.568581	1.75159	0	0.00549859	0.566	3650	tags=45%, list=23%, signal=58%
PID_PTP1B_PATHWAY	47	0.63873	1.75133	0.00162866	0.00548412	0.567	2399	tags=45%, list=15%, signal=52%
REACTOME_CELLULAR_RESPONSE_TO_HYPOXIA	71	0.586199	1.74666	0	0.00586886	0.594	4467	tags=58%, list=28%, signal=80%
REACTOME_LEISHMANIA_INFECTION	193	0.523442	1.7452	0	0.00597173	0.603	1198	tags=25%, list=8%, signal=27%
REACTOME_SCAVENGING_BY_CLASS_A_RECEPTORS	17	0.772881	1.74489	0.00171527	0.00594813	0.603	2885	tags=65%, list=18%, signal=79%
REACTOME_TICAM1_RIP1_MEDIATED_IKK_COMPLEX_RECRUITMENT	19	0.744346	1.74336	0	0.00604751	0.613	2191	tags=42%, list=14%, signal=49%
REACTOME_CYTOSOLIC_SENSORS_OF_PATHOGEN_ASSOCIATED_DNA	63	0.602611	1.74125	0.00168919	0.0062114	0.626	2350	tags=30%, list=15%, signal=35%
NABA_SECRETED_FACTORS	226	0.513366	1.74122	0	0.00618027	0.627	2071	tags=29%, list=13%, signal=33%
REACTOME_G1_S_DNA_DAMAGE_CHECKPOINTS	66	0.596308	1.73996	0.00156986	0.00626539	0.631	3759	tags=47%, list=24%, signal=61%
PID_HIV_NEF_PATHWAY	34	0.667291	1.73988	0.00168067	0.00622788	0.631	1413	tags=38%, list=9%, signal=42%
REACTOME_DECTIN_1_MEDIATED_NONCANONICAL_NF_KB_SIGNALING	59	0.608327	1.73959	0.0016129	0.00622257	0.633	3759	tags=59%, list=24%, signal=77%
REACTOME_DEGRADATION_OF_AXIN	53	0.616629	1.73849	0	0.00627424	0.638	4467	tags=64%, list=28%, signal=89%
REACTOME_HEDGEHOG_LIGAND_BIOGENESIS	62	0.599741	1.7381	0	0.0062687	0.639	3759	tags=53%, list=24%, signal=69%
REACTOME_GENE_AND_PROTEIN_EXPRESSION_BY_JAK_STAT_SIGNALING_AFTER_INTERLEUKIN_12_STIMULATION	34	0.666756	1.73232	0.00167224	0.00680835	0.667	767	tags=24%, list=5%, signal=25%
REACTOME_HOST_INTERACTIONS_OF_HIV_FACTORS	128	0.541247	1.72997	0	0.00704158	0.68	2436	tags=27%, list=15%, signal=31%
PID_AP1_PATHWAY	62	0.590593	1.72761	0	0.00727752	0.695	3209	tags=44%, list=20%, signal=54%
BIOCARTA_IL7_PATHWAY	16	0.77056	1.72505	0.00367647	0.00758974	0.71	1423	tags=44%, list=9%, signal=48%
REACTOME_RIP_MEDIATED_NFKB_ACTIVATION_VIA_ZBP1	17	0.780982	1.72473	0.003663	0.00757699	0.714	1591	tags=53%, list=10%, signal=59%
REACTOME_PLASMA_LIPOPROTEIN_CLEARANCE	28	0.683524	1.72053	0	0.00801046	0.733	849	tags=21%, list=5%, signal=23%
REACTOME_ZBP1_DAI_MEDIATED_INDUCTION_OF_TYPE_I_IFNS	21	0.740547	1.71991	0.00733945	0.0080132	0.734	2191	tags=52%, list=14%, signal=61%
REACTOME_RESPONSE_OF_EIF2AK4_GCN2_TO_AMINO_ACID_DEFICIENCY	99	0.54735	1.719	0	0.0080698	0.738	6038	tags=74%, list=38%, signal=118%
BIOCARTA_NKCELLS_PATHWAY	18	0.742125	1.71819	0	0.00811958	0.742	961	tags=39%, list=6%, signal=41%
REACTOME_CLEC7A_DECTIN_1_SIGNALING	97	0.554289	1.71765	0	0.00811009	0.742	2436	tags=39%, list=15%, signal=46%
PID_CMYB_PATHWAY	77	0.579648	1.71521	0	0.00839308	0.76	1691	tags=21%, list=11%, signal=23%
KEGG_RIG_I_LIKE_RECEPTOR_SIGNALING_PATHWAY	52	0.610483	1.71475	0	0.00841723	0.764	1906	tags=38%, list=12%, signal=44%
REACTOME_INTERLEUKIN_20_FAMILY_SIGNALING	17	0.75583	1.71403	0.0052356	0.00851612	0.774	1222	tags=53%, list=8%, signal=57%
REACTOME_ROLE_OF_LAT2_NTAL_LAB_ON_CALCIUM_MOBILIZATION	15	0.782068	1.71371	0	0.00849306	0.775	776	tags=33%, list=5%, signal=35%
REACTOME_INFLAMMASOMES	20	0.726701	1.71301	0.00521739	0.00848737	0.776	1175	tags=40%, list=7%, signal=43%
REACTOME_MYD88_INDEPENDENT_TLR4_CASCADE	96	0.552936	1.70566	0	0.00948478	0.811	2191	tags=34%, list=14%, signal=40%
PID_IL8_CXCR2_PATHWAY	34	0.667684	1.70031	0.00177936	0.0102971	0.829	933	tags=41%, list=6%, signal=44%
PID_SYNDECAN_4_PATHWAY	28	0.669139	1.69545	0.0017331	0.0110739	0.857	3338	tags=61%, list=21%, signal=77%
REACTOME_ABC_TRANSPORTER_DISORDERS	71	0.567472	1.69165	0.00155039	0.0116753	0.874	3759	tags=49%, list=24%, signal=64%
PID_INTEGRIN3_PATHWAY	39	0.628951	1.69106	0.00166945	0.0117196	0.876	3294	tags=56%, list=21%, signal=71%
BIOCARTA_PML_PATHWAY	16	0.760363	1.6907	0.00364299	0.0117299	0.877	930	tags=38%, list=6%, signal=40%
REACTOME_FCERI_MEDIATED_MAPK_ACTIVATION	30	0.656529	1.68917	0.0035524	0.0119124	0.88	776	tags=27%, list=5%, signal=28%
KEGG_RIBOSOME	85	0.554344	1.68663	0.0015083	0.0122695	0.889	5934	tags=73%, list=37%, signal=116%
REACTOME_REGULATION_OF_MRNA_STABILITY_BY_PROTEINS_THAT_BIND_AU_RICH_ELEMENTS	85	0.557841	1.68627	0.00311526	0.012284	0.889	3759	tags=41%, list=24%, signal=54%
REACTOME_FC_EPSILON_RECEPTOR_FCERI_SIGNALING	126	0.523285	1.68599	0	0.0122595	0.889	2436	tags=32%, list=15%, signal=37%
BIOCARTA_TNFR2_PATHWAY	17	0.752071	1.68532	0.005386	0.0122786	0.892	1591	tags=47%, list=10%, signal=52%
BIOCARTA_MITOCHONDRIA_PATHWAY	18	0.732914	1.68518	0.00865052	0.0122541	0.892	2013	tags=39%, list=13%, signal=44%
REACTOME_CARGO_CONCENTRATION_IN_THE_ER	32	0.648393	1.68472	0.00818331	0.0122725	0.898	3804	tags=63%, list=24%, signal=82%
PID_TCPTP_PATHWAY	40	0.630146	1.67943	0.00505051	0.013153	0.92	1545	tags=30%, list=10%, signal=33%
REACTOME_ARACHIDONIC_ACID_METABOLISM	42	0.624918	1.6775	0.00518135	0.0134595	0.926	2277	tags=33%, list=14%, signal=39%
REACTOME_TAK1_ACTIVATES_NFKB_BY_PHOSPHORYLATION_AND_ACTIVATION_OF_IKKS_COMPLEX	32	0.643994	1.67058	0.00704225	0.0147411	0.949	1644	tags=31%, list=10%, signal=35%
REACTOME_PROGRAMMED_CELL_DEATH	170	0.506658	1.67028	0	0.0147735	0.949	2436	tags=30%, list=15%, signal=35%
BIOCARTA_IL2_PATHWAY	21	0.693264	1.66553	0.0123239	0.0157714	0.955	1509	tags=38%, list=9%, signal=42%
SA_CASPASE_CASCADE	18	0.727213	1.66095	0	0.0165421	0.963	1372	tags=44%, list=9%, signal=49%
REACTOME_NEF_MEDIATES_DOWN_MODULATION_OF_CELL_SURFACE_RECEPTORS_BY_RECRUITING_THEM_TO_CLATHRIN_ADAPTERS	20	0.709427	1.65891	0.00524476	0.0169435	0.965	2176	tags=50%, list=14%, signal=58%
REACTOME_REGULATION_OF_KIT_SIGNALING	16	0.74787	1.65833	0.00182815	0.0170217	0.965	1233	tags=31%, list=8%, signal=34%
BIOCARTA_NTHI_PATHWAY	23	0.692644	1.65779	0.0122807	0.0170427	0.965	3118	tags=57%, list=20%, signal=70%
REACTOME_ACTIVATION_OF_IRF3_IRF7_MEDIATED_BY_TBK1_IKK_EPSILON	17	0.736896	1.65761	0.00350877	0.0170065	0.965	862	tags=35%, list=5%, signal=37%
PID_TNF_PATHWAY	45	0.602874	1.65738	0.00487013	0.016986	0.965	2475	tags=44%, list=16%, signal=52%
REACTOME_INTERLEUKIN_37_SIGNALING	20	0.703405	1.6563	0.00524476	0.0171076	0.966	1316	tags=45%, list=8%, signal=49%
REACTOME_EXTRACELLULAR_MATRIX_ORGANIZATION	267	0.481134	1.65536	0	0.0172036	0.97	3080	tags=40%, list=19%, signal=48%
PID_IL27_PATHWAY	21	0.703952	1.65326	0.00170068	0.0176269	0.971	1222	tags=43%, list=8%, signal=46%
REACTOME_APC_C_MEDIATED_DEGRADATION_OF_CELL_CYCLE_PROTEINS	84	0.543354	1.65268	0	0.0177085	0.972	3759	tags=42%, list=24%, signal=54%
REACTOME_THE_NLRP3_INFLAMMASOME	15	0.73825	1.64748	0.0108499	0.0186795	0.979	1175	tags=47%, list=7%, signal=50%
REACTOME_MITOCHONDRIAL_TRANSLATION	94	0.527914	1.64336	0	0.0194888	0.983	4556	tags=50%, list=29%, signal=70%
REACTOME_DEGRADATION_OF_DVL	55	0.570195	1.63817	0.00328947	0.0207548	0.987	3759	tags=53%, list=24%, signal=69%
REACTOME_LAMININ_INTERACTIONS	30	0.642026	1.63657	0.00714286	0.0210356	0.987	4319	tags=67%, list=27%, signal=91%
BIOCARTA_IL1R_PATHWAY	29	0.63893	1.63559	0.00856164	0.0212214	0.987	2163	tags=48%, list=14%, signal=56%
REACTOME_CD28_CO_STIMULATION	33	0.628189	1.63114	0.00337268	0.0222767	0.99	1555	tags=30%, list=10%, signal=34%
PID_INTEGRIN5_PATHWAY	17	0.713691	1.62807	0.00550459	0.0229584	0.99	3294	tags=65%, list=21%, signal=81%
BIOCARTA_CSK_PATHWAY	19	0.701087	1.62734	0.0123675	0.0230284	0.99	1554	tags=53%, list=10%, signal=58%
PID_ALPHA_SYNUCLEIN_PATHWAY	29	0.633863	1.62612	0.0066335	0.0232835	0.991	1672	tags=31%, list=10%, signal=35%
REACTOME_UCH_PROTEINASES	90	0.531036	1.62572	0	0.0233025	0.992	3650	tags=41%, list=23%, signal=53%
REACTOME_P75NTR_SIGNALS_VIA_NF_KB	16	0.729298	1.62512	0.00719425	0.0233989	0.992	1591	tags=44%, list=10%, signal=49%
REACTOME_RHO_GTPASES_ACTIVATE_WASPS_AND_WAVES	36	0.616836	1.6239	0.00847458	0.0236447	0.992	1198	tags=36%, list=8%, signal=39%
REACTOME_CLASS_A_1_RHODOPSIN_LIKE_RECEPTORS	210	0.480147	1.6199	0	0.0247752	0.993	1664	tags=26%, list=10%, signal=29%
REACTOME_ANTIVIRAL_MECHANISM_BY_IFN_STIMULATED_GENES	81	0.531075	1.61622	0.00150376	0.0257392	0.994	3615	tags=36%, list=23%, signal=46%
REACTOME_TNFR1_INDUCED_NFKAPPAB_SIGNALING_PATHWAY	30	0.635232	1.6121	0.0119658	0.0269261	0.995	1591	tags=23%, list=10%, signal=26%
BIOCARTA_IL12_PATHWAY	19	0.683753	1.60685	0.0168224	0.0284834	0.996	662	tags=42%, list=4%, signal=44%
REACTOME_ATF4_ACTIVATES_GENES_IN_RESPONSE_TO_ENDOPLASMIC_RETICULUM_STRESS	27	0.635571	1.60305	0.0127042	0.0296551	0.997	1424	tags=19%, list=9%, signal=20%
KEGG_PRION_DISEASES	29	0.632678	1.60157	0.0118846	0.030044	0.998	1941	tags=34%, list=12%, signal=39%
REACTOME_SELENOAMINO_ACID_METABOLISM	114	0.503029	1.59989	0.00151057	0.0304093	0.999	5934	tags=67%, list=37%, signal=105%
PID_KIT_PATHWAY	50	0.57885	1.59783	0.0066778	0.0310517	0.999	1509	tags=26%, list=9%, signal=29%
REACTOME_ELASTIC_FIBRE_FORMATION	44	0.586669	1.5923	0.0118846	0.0328028	0.999	2527	tags=36%, list=16%, signal=43%
REACTOME_SRP_DEPENDENT_COTRANSLATIONAL_PROTEIN_TARGETING_TO_MEMBRANE	110	0.50579	1.59183	0.00153374	0.032835	0.999	5613	tags=70%, list=35%, signal=107%
REACTOME_REGULATION_OF_RUNX2_EXPRESSION_AND_ACTIVITY	71	0.532211	1.58746	0.00661157	0.0343071	0.999	3759	tags=49%, list=24%, signal=64%
REACTOME_TOLL_LIKE_RECEPTOR_TLR1_TLR2_CASCADE	94	0.517687	1.58557	0.00295421	0.0348487	0.999	2163	tags=30%, list=14%, signal=34%
REACTOME_RUNX1_REGULATES_TRANSCRIPTION_OF_GENES_INVOLVED_IN_DIFFERENTIATION_OF_HSCS	99	0.511027	1.58289	0	0.0357831	0.999	3818	tags=39%, list=24%, signal=51%
REACTOME_TRANSLATION	290	0.455446	1.58188	0	0.0360564	0.999	5135	tags=52%, list=32%, signal=75%
KEGG_PORPHYRIN_AND_CHLOROPHYLL_METABOLISM	22	0.666081	1.5805	0.00919118	0.0364934	0.999	2431	tags=41%, list=15%, signal=48%
KEGG_GLUTATHIONE_METABOLISM	39	0.594364	1.57759	0.0115512	0.037584	0.999	3220	tags=44%, list=20%, signal=54%
REACTOME_CELL_EXTRACELLULAR_MATRIX_INTERACTIONS	18	0.6852	1.57742	0.0170455	0.0375037	0.999	3005	tags=56%, list=19%, signal=68%
REACTOME_DISORDERS_OF_TRANSMEMBRANE_TRANSPORTERS	145	0.486029	1.56917	0	0.0407487	0.999	3650	tags=37%, list=23%, signal=47%
REACTOME_OTHER_SEMAPHORIN_INTERACTIONS	19	0.682083	1.56872	0.0207156	0.0407954	0.999	1398	tags=37%, list=9%, signal=40%
REACTOME_NEGATIVE_REGULATION_OF_NOTCH4_SIGNALING	54	0.544393	1.56555	0.00646204	0.0420577	0.999	4277	tags=67%, list=27%, signal=91%
PID_IL1_PATHWAY	34	0.603167	1.56201	0.0191304	0.0436821	0.999	1591	tags=35%, list=10%, signal=39%
SA_B_CELL_RECEPTOR_COMPLEXES	24	0.636267	1.56137	0.0157618	0.0437556	0.999	1509	tags=29%, list=9%, signal=32%
REACTOME_REGULATION_OF_PTEN_STABILITY_AND_ACTIVITY	67	0.531642	1.56109	0.00644122	0.0437207	0.999	3759	tags=45%, list=24%, signal=58%
REACTOME_DEGRADATION_OF_GLI1_BY_THE_PROTEASOME	57	0.554665	1.56079	0.0131796	0.0436614	0.999	4467	tags=67%, list=28%, signal=92%
PID_PDGFRB_PATHWAY	126	0.48413	1.55806	0.00292398	0.0447105	1	2071	tags=26%, list=13%, signal=30%
REACTOME_REGULATION_OF_INNATE_IMMUNE_RESPONSES_TO_CYTOSOLIC_DNA	15	0.703214	1.55033	0.0318949	0.0483334	1	3985	tags=67%, list=25%, signal=89%
KEGG_FC_EPSILON_RI_SIGNALING_PATHWAY	63	0.533038	1.54842	0.00807754	0.0491125	1	792	tags=19%, list=5%, signal=20%
REACTOME_HIV_INFECTION	226	0.456733	1.54765	0.00136799	0.0493365	1	4281	tags=40%, list=27%, signal=54%
REACTOME_NICOTINATE_METABOLISM	27	0.621589	1.54483	0.0198676	0.0504857	1	2493	tags=37%, list=16%, signal=44%
REACTOME_OTHER_INTERLEUKIN_SIGNALING	23	0.642964	1.54221	0.0240137	0.0516803	1	454	tags=35%, list=3%, signal=36%
PID_NFKAPPAB_ATYPICAL_PATHWAY	16	0.69348	1.54201	0.0133843	0.0515737	1	2163	tags=50%, list=14%, signal=58%
REACTOME_REGULATION_OF_TNFR1_SIGNALING	33	0.599482	1.53865	0.0280702	0.053159	1	1591	tags=27%, list=10%, signal=30%
REACTOME_ACTIVATED_TAK1_MEDIATES_P38_MAPK_ACTIVATION	23	0.643312	1.53843	0.0189329	0.0530486	1	2622	tags=43%, list=16%, signal=52%
REACTOME_PLASMA_LIPOPROTEIN_ASSEMBLY_REMODELING_AND_CLEARANCE	54	0.548264	1.53768	0.00949367	0.0532147	1	3352	tags=37%, list=21%, signal=47%
REACTOME_REGULATION_OF_EXPRESSION_OF_SLITS_AND_ROBOS	165	0.465046	1.53756	0	0.0530959	1	5215	tags=54%, list=33%, signal=79%
SIG_BCR_SIGNALING_PATHWAY	44	0.558645	1.53681	0.00802568	0.0532906	1	1509	tags=30%, list=9%, signal=33%
REACTOME_REGULATION_OF_RAS_BY_GAPS	66	0.530273	1.53355	0.0144	0.0547185	1	4277	tags=55%, list=27%, signal=74%
PID_MYC_REPRESS_PATHWAY	60	0.528198	1.53152	0.00944882	0.0556391	1	1969	tags=25%, list=12%, signal=28%
REACTOME_HYALURONAN_METABOLISM	16	0.698647	1.52979	0.0265018	0.0563887	1	1186	tags=38%, list=7%, signal=40%
REACTOME_SMOOTH_MUSCLE_CONTRACTION	33	0.582987	1.52311	0.020654	0.0597233	1	2552	tags=48%, list=16%, signal=58%
REACTOME_STING_MEDIATED_INDUCTION_OF_HOST_IMMUNE_RESPONSES	16	0.679986	1.52263	0.0392523	0.0598112	1	3336	tags=44%, list=21%, signal=55%
REACTOME_G2_M_CHECKPOINTS	149	0.468895	1.51826	0.00143267	0.0620706	1	4384	tags=36%, list=27%, signal=49%
REACTOME_EUKARYOTIC_TRANSLATION_INITIATION	117	0.477593	1.51649	0	0.0628754	1	5934	tags=66%, list=37%, signal=104%
PID_TXA2PATHWAY	53	0.54218	1.5155	0.00996678	0.0632229	1	1672	tags=36%, list=10%, signal=40%
REACTOME_MHC_CLASS_II_ANTIGEN_PRESENTATION	111	0.487536	1.51417	0.00287356	0.0637751	1	1964	tags=32%, list=12%, signal=36%
PID_TRAIL_PATHWAY	28	0.603393	1.51324	0.0333919	0.0640976	1	2475	tags=54%, list=16%, signal=63%
REACTOME_TRANSCRIPTIONAL_REGULATION_BY_RUNX2	114	0.476678	1.51144	0.0060241	0.0649373	1	3650	tags=40%, list=23%, signal=52%
REACTOME_THE_ROLE_OF_GTSE1_IN_G2_M_PROGRESSION_AFTER_G2_CHECKPOINT	70	0.512096	1.5114	0.00622084	0.0647115	1	4277	tags=54%, list=27%, signal=74%
REACTOME_TRAF6_MEDIATED_INDUCTION_OF_TAK1_COMPLEX_WITHIN_TLR4_COMPLEX	16	0.676408	1.50827	0.042328	0.0663896	1	2327	tags=38%, list=15%, signal=44%
REACTOME_TERMINATION_OF_TRANSLESION_DNA_SYNTHESIS	32	0.587871	1.506	0.0213465	0.0674727	1	4133	tags=50%, list=26%, signal=67%
REACTOME_PERK_REGULATES_GENE_EXPRESSION	32	0.591379	1.5054	0.015873	0.0676887	1	1424	tags=19%, list=9%, signal=21%
REACTOME_CD28_DEPENDENT_PI3K_AKT_SIGNALING	22	0.634454	1.50494	0.0159858	0.0676594	1	1364	tags=27%, list=9%, signal=30%
REACTOME_COLLAGEN_DEGRADATION	54	0.53112	1.50005	0.0199336	0.0705616	1	3212	tags=52%, list=20%, signal=65%
KEGG_HOMOLOGOUS_RECOMBINATION	27	0.596492	1.49971	0.0357143	0.0705299	1	4133	tags=37%, list=26%, signal=50%
PID_RAC1_PATHWAY	53	0.528587	1.49963	0.0189873	0.0703392	1	1222	tags=26%, list=8%, signal=29%
PID_FAS_PATHWAY	36	0.574028	1.49935	0.013468	0.0702667	1	1591	tags=33%, list=10%, signal=37%
PID_EPHA_FWDPATHWAY	32	0.580395	1.49713	0.0332168	0.0714919	1	1134	tags=25%, list=7%, signal=27%
REACTOME_CONSTITUTIVE_SIGNALING_BY_ABERRANT_PI3K_IN_CANCER	62	0.515031	1.49572	0.0145867	0.0721595	1	2251	tags=29%, list=14%, signal=34%
BIOCARTA_IL6_PATHWAY	21	0.632518	1.49342	0.0338078	0.0733353	1	1509	tags=29%, list=9%, signal=32%
REACTOME_ROLE_OF_PHOSPHOLIPIDS_IN_PHAGOCYTOSIS	25	0.609694	1.49041	0.0234657	0.0750867	1	481	tags=24%, list=3%, signal=25%
PID_IL2_1PATHWAY	53	0.522492	1.48862	0.0191388	0.0760223	1	1558	tags=32%, list=10%, signal=35%
REACTOME_SYNDECAN_INTERACTIONS	27	0.589642	1.48721	0.0438597	0.0766803	1	2817	tags=52%, list=18%, signal=63%
REACTOME_DISEASES_ASSOCIATED_WITH_N_GLYCOSYLATION_OF_PROTEINS	17	0.665728	1.48694	0.0528302	0.076592	1	4573	tags=76%, list=29%, signal=107%
BIOCARTA_EICOSANOID_PATHWAY	21	0.624897	1.48337	0.039783	0.078855	1	2064	tags=48%, list=13%, signal=55%
KEGG_N_GLYCAN_BIOSYNTHESIS	46	0.537295	1.48301	0.0337268	0.0788357	1	2782	tags=43%, list=17%, signal=53%
KEGG_STARCH_AND_SUCROSE_METABOLISM	24	0.613884	1.48172	0.0463458	0.0793879	1	1259	tags=25%, list=8%, signal=27%
REACTOME_COLLAGEN_FORMATION	85	0.493111	1.4803	0.0156006	0.0800993	1	3080	tags=46%, list=19%, signal=57%
REACTOME_GLYCOSPHINGOLIPID_METABOLISM	42	0.539092	1.47816	0.0232172	0.0813858	1	2475	tags=48%, list=16%, signal=56%
REACTOME_INTERLEUKIN_6_FAMILY_SIGNALING	22	0.620509	1.47784	0.0328467	0.0813546	1	2805	tags=59%, list=18%, signal=72%
REACTOME_TOLL_LIKE_RECEPTOR_9_TLR9_CASCADE	94	0.484087	1.46606	0.0163934	0.0897949	1	2428	tags=31%, list=15%, signal=36%
REACTOME_TRANSLESION_SYNTHESIS_BY_Y_FAMILY_DNA_POLYMERASES_BYPASSES_LESIONS_ON_DNA_TEMPLATE	39	0.546829	1.4658	0.0277778	0.0896933	1	4133	tags=41%, list=26%, signal=55%
KEGG_GALACTOSE_METABOLISM	22	0.600878	1.46082	0.0505226	0.0933061	1	2396	tags=41%, list=15%, signal=48%
BIOCARTA_CTCF_PATHWAY	24	0.593036	1.45994	0.0403509	0.0936314	1	2865	tags=33%, list=18%, signal=41%
REACTOME_GLUTATHIONE_CONJUGATION	29	0.574166	1.45099	0.050173	0.101075	1	3220	tags=41%, list=20%, signal=52%
PID_HIF1_TFPATHWAY	62	0.493127	1.44805	0.0352564	0.103326	1	4318	tags=42%, list=27%, signal=57%
REACTOME_TRANSCRIPTIONAL_REGULATION_OF_GRANULOPOIESIS	61	0.494937	1.44645	0.0225806	0.10439	1	1954	tags=20%, list=12%, signal=22%
REACTOME_METABOLISM_OF_FOLATE_AND_PTERINES	17	0.627648	1.44248	0.0612245	0.107496	1	3746	tags=41%, list=23%, signal=54%
REACTOME_KERATAN_SULFATE_KERATIN_METABOLISM	32	0.561108	1.44227	0.0352349	0.107341	1	1557	tags=28%, list=10%, signal=31%
KEGG_ONE_CARBON_POOL_BY_FOLATE	17	0.631159	1.44157	0.0570866	0.107625	1	3997	tags=41%, list=25%, signal=55%
KEGG_TRYPTOPHAN_METABOLISM	32	0.560954	1.44118	0.0420315	0.107601	1	721	tags=19%, list=5%, signal=20%
PID_SHP2_PATHWAY	52	0.512671	1.43981	0.0320946	0.108489	1	2399	tags=31%, list=15%, signal=36%
REACTOME_DEGRADATION_OF_THE_EXTRACELLULAR_MATRIX	119	0.452201	1.43972	0.00879765	0.108194	1	3304	tags=42%, list=21%, signal=53%
PID_AVB3_OPN_PATHWAY	31	0.562847	1.43761	0.0461285	0.109627	1	1721	tags=35%, list=11%, signal=40%
PID_IL2_PI3K_PATHWAY	33	0.556696	1.4354	0.0406091	0.111386	1	1509	tags=24%, list=9%, signal=27%
REACTOME_GROWTH_HORMONE_RECEPTOR_SIGNALING	20	0.606344	1.43397	0.0629496	0.112312	1	1558	tags=40%, list=10%, signal=44%
PID_SYNDECAN_1_PATHWAY	46	0.51781	1.42975	0.0369181	0.115796	1	3065	tags=46%, list=19%, signal=56%
REACTOME_CYCLIN_A_CDK2_ASSOCIATED_EVENTS_AT_S_PHASE_ENTRY	85	0.473696	1.42913	0.0166415	0.115998	1	4350	tags=49%, list=27%, signal=68%
BIOCARTA_STRESS_PATHWAY	24	0.588636	1.42833	0.0496323	0.116324	1	2163	tags=46%, list=14%, signal=53%
REACTOME_FORMATION_OF_THE_CORNIFIED_ENVELOPE	33	0.547464	1.42751	0.0400697	0.116726	1	2084	tags=30%, list=13%, signal=35%
KEGG_MISMATCH_REPAIR	22	0.597834	1.42516	0.0612613	0.118423	1	4271	tags=41%, list=27%, signal=56%
REACTOME_EUKARYOTIC_TRANSLATION_ELONGATION	91	0.462245	1.42339	0.0217729	0.11977	1	5953	tags=70%, list=37%, signal=112%
BIOCARTA_FAS_PATHWAY	29	0.561156	1.42074	0.0629371	0.121847	1	1413	tags=31%, list=9%, signal=34%
REACTOME_HEDGEHOG_ON_STATE	83	0.464193	1.42036	0.0196375	0.121793	1	4277	tags=46%, list=27%, signal=62%
REACTOME_KERATINIZATION	33	0.547464	1.42017	0.05	0.121618	1	2084	tags=30%, list=13%, signal=35%
REACTOME_FORMATION_OF_FIBRIN_CLOT_CLOTTING_CASCADE	23	0.591055	1.41921	0.061706	0.1222	1	1343	tags=26%, list=8%, signal=28%
KEGG_PANCREATIC_CANCER	68	0.478775	1.4142	0.0387722	0.126585	1	2000	tags=22%, list=13%, signal=25%
REACTOME_MISMATCH_REPAIR	15	0.639174	1.4119	0.0782123	0.128454	1	4271	tags=47%, list=27%, signal=64%
REACTOME_SIGNALING_BY_NOTCH4	82	0.470578	1.41029	0.0193548	0.129604	1	4277	tags=54%, list=27%, signal=73%
NABA_ECM_AFFILIATED	117	0.449355	1.41007	0.00903614	0.129404	1	1205	tags=18%, list=8%, signal=19%
KEGG_REGULATION_OF_ACTIN_CYTOSKELETON	192	0.418667	1.40743	0.00410959	0.131599	1	2253	tags=27%, list=14%, signal=31%
REACTOME_DOWNSTREAM_SIGNALING_EVENTS_OF_B_CELL_RECEPTOR_BCR	79	0.469512	1.40672	0.032967	0.131888	1	3650	tags=52%, list=23%, signal=67%
KEGG_ARACHIDONIC_ACID_METABOLISM	35	0.536552	1.40522	0.046281	0.132911	1	2064	tags=29%, list=13%, signal=33%
PID_NFAT_TFPATHWAY	37	0.53275	1.40317	0.0456942	0.13451	1	2513	tags=35%, list=16%, signal=42%
REACTOME_TNF_SIGNALING	43	0.517408	1.40195	0.0588235	0.135399	1	1591	tags=26%, list=10%, signal=28%
REACTOME_PHASE_II_CONJUGATION_OF_COMPOUNDS	69	0.482082	1.40101	0.0282132	0.135979	1	3717	tags=41%, list=23%, signal=53%
REACTOME_G_PROTEIN_BETA_GAMMA_SIGNALLING	29	0.545349	1.39943	0.059322	0.13721	1	1682	tags=41%, list=11%, signal=46%
REACTOME_METABOLISM_OF_WATER_SOLUBLE_VITAMINS_AND_COFACTORS	111	0.443989	1.39881	0.0288316	0.137433	1	2858	tags=27%, list=18%, signal=33%
REACTOME_METAL_ION_SLC_TRANSPORTERS	22	0.578167	1.39701	0.0643939	0.138887	1	2570	tags=45%, list=16%, signal=54%
REACTOME_RESPONSE_OF_EIF2AK1_HRI_TO_HEME_DEFICIENCY	15	0.637961	1.39526	0.0727273	0.1404	1	3288	tags=40%, list=21%, signal=50%
REACTOME_LDL_CLEARANCE	17	0.61761	1.39487	0.0757856	0.140403	1	698	tags=18%, list=4%, signal=18%
REACTOME_MOLECULES_ASSOCIATED_WITH_ELASTIC_FIBRES	37	0.530801	1.39448	0.0546358	0.140422	1	2527	tags=30%, list=16%, signal=35%
REACTOME_DISEASES_ASSOCIATED_WITH_GLYCOSAMINOGLYCAN_METABOLISM	40	0.517297	1.39006	0.0595238	0.144896	1	2339	tags=33%, list=15%, signal=38%
PID_IL8_CXCR1_PATHWAY	28	0.551868	1.38964	0.0870337	0.144973	1	933	tags=36%, list=6%, signal=38%
REACTOME_HDR_THROUGH_HOMOLOGOUS_RECOMBINATION_HRR	67	0.461538	1.38492	0.0385852	0.149812	1	4133	tags=28%, list=26%, signal=38%
REACTOME_ANTI_INFLAMMATORY_RESPONSE_FAVOURING_LEISHMANIA_PARASITE_INFECTION	113	0.43866	1.38358	0.030349	0.150794	1	1059	tags=19%, list=7%, signal=20%
REACTOME_PCP_CE_PATHWAY	89	0.454973	1.38138	0.0227618	0.152913	1	3650	tags=42%, list=23%, signal=54%
REACTOME_INFECTION_WITH_MYCOBACTERIUM_TUBERCULOSIS	26	0.553292	1.38077	0.0699301	0.153189	1	2072	tags=23%, list=13%, signal=26%
REACTOME_NEGATIVE_REGULATION_OF_THE_PI3K_AKT_NETWORK	96	0.442314	1.38016	0.0286576	0.153485	1	1545	tags=19%, list=10%, signal=21%
REACTOME_S_PHASE	159	0.421576	1.37713	0.0116618	0.156482	1	4384	tags=37%, list=27%, signal=51%
REACTOME_PCNA_DEPENDENT_LONG_PATCH_BASE_EXCISION_REPAIR	21	0.585309	1.37024	0.0679442	0.164233	1	4133	tags=38%, list=26%, signal=51%
REACTOME_INFLUENZA_INFECTION	152	0.419532	1.36958	0.0215208	0.164533	1	5613	tags=53%, list=35%, signal=81%
REACTOME_DNA_DAMAGE_BYPASS	48	0.497053	1.36924	0.0599676	0.164462	1	4133	tags=38%, list=26%, signal=50%
REACTOME_GPCR_LIGAND_BINDING	296	0.394355	1.36313	0.00527705	0.17138	1	1817	tags=22%, list=11%, signal=24%
REACTOME_BASIGIN_INTERACTIONS	25	0.552052	1.35881	0.0920139	0.176321	1	2198	tags=36%, list=14%, signal=42%
REACTOME_OVARIAN_TUMOR_DOMAIN_PROTEASES	37	0.508585	1.35772	0.0696864	0.177189	1	1435	tags=30%, list=9%, signal=33%
KEGG_SMALL_CELL_LUNG_CANCER	84	0.44145	1.35624	0.0393939	0.17851	1	3561	tags=32%, list=22%, signal=41%
REACTOME_TIGHT_JUNCTION_INTERACTIONS	18	0.58698	1.35604	0.0957447	0.178264	1	1261	tags=17%, list=8%, signal=18%
REACTOME_COPII_MEDIATED_VESICLE_TRANSPORT	67	0.460938	1.35282	0.0346457	0.181882	1	2725	tags=30%, list=17%, signal=36%
REACTOME_MAPK6_MAPK4_SIGNALING	85	0.444236	1.35168	0.0466563	0.182774	1	3759	tags=41%, list=24%, signal=54%
BIOCARTA_FCER1_PATHWAY	38	0.507961	1.34895	0.089172	0.185597	1	1086	tags=21%, list=7%, signal=23%
REACTOME_ASSEMBLY_OF_COLLAGEN_FIBRILS_AND_OTHER_MULTIMERIC_STRUCTURES	56	0.473071	1.34754	0.0612903	0.186968	1	3080	tags=45%, list=19%, signal=55%
PID_CD8_TCR_DOWNSTREAM_PATHWAY	50	0.474284	1.34233	0.0644654	0.193215	1	1759	tags=36%, list=11%, signal=40%
REACTOME_GAP_FILLING_DNA_REPAIR_SYNTHESIS_AND_LIGATION_IN_GG_NER	25	0.542488	1.34121	0.105263	0.19416	1	4133	tags=48%, list=26%, signal=65%
REACTOME_TRP_CHANNELS	23	0.553022	1.34105	0.0867257	0.193876	1	1908	tags=26%, list=12%, signal=30%
REACTOME_UNFOLDED_PROTEIN_RESPONSE_UPR	91	0.431733	1.3409	0.0451713	0.193565	1	2803	tags=29%, list=18%, signal=34%
REACTOME_METABOLISM_OF_PORPHYRINS	21	0.564445	1.34018	0.120141	0.193892	1	2431	tags=29%, list=15%, signal=34%
KEGG_ACUTE_MYELOID_LEUKEMIA	57	0.475311	1.33883	0.0734095	0.195138	1	1869	tags=23%, list=12%, signal=26%
KEGG_ECM_RECEPTOR_INTERACTION	79	0.44604	1.33766	0.0534846	0.196077	1	3420	tags=47%, list=21%, signal=59%
KEGG_METABOLISM_OF_XENOBIOTICS_BY_CYTOCHROME_P450	29	0.529143	1.33647	0.10274	0.197037	1	3060	tags=34%, list=19%, signal=43%
REACTOME_INTERCONVERSION_OF_NUCLEOTIDE_DI_AND_TRIPHOSPHATES	29	0.522997	1.33385	0.0847751	0.200078	1	4096	tags=45%, list=26%, signal=60%
REACTOME_SYNTHESIS_OF_GLYCOSYLPHOSPHATIDYLINOSITOL_GPI	18	0.578167	1.32683	0.119141	0.20905	1	3292	tags=33%, list=21%, signal=42%
REACTOME_DISEASES_ASSOCIATED_WITH_GLYCOSYLATION_PRECURSOR_BIOSYNTHESIS	18	0.57605	1.3254	0.130662	0.210309	1	2651	tags=39%, list=17%, signal=47%
REACTOME_ACTIVATION_OF_THE_MRNA_UPON_BINDING_OF_THE_CAP_BINDING_COMPLEX_AND_EIFS_AND_SUBSEQUENT_BINDING_TO_43S	59	0.459408	1.3251	0.073718	0.21012	1	5883	tags=69%, list=37%, signal=110%
PID_AVB3_INTEGRIN_PATHWAY	72	0.450131	1.32481	0.0611621	0.210021	1	2529	tags=32%, list=16%, signal=38%
BIOCARTA_TCR_PATHWAY	44	0.47725	1.3234	0.0755034	0.211392	1	1509	tags=27%, list=9%, signal=30%
REACTOME_BIOSYNTHESIS_OF_THE_N_GLYCAN_PRECURSOR_DOLICHOL_LIPID_LINKED_OLIGOSACCHARIDE_LLO_AND_TRANSFER_TO_A_NASCENT_PROTEIN	77	0.442406	1.32153	0.0686427	0.213533	1	2722	tags=32%, list=17%, signal=39%
BIOCARTA_CERAMIDE_PATHWAY	21	0.561327	1.3202	0.107584	0.214865	1	1864	tags=38%, list=12%, signal=43%
PID_LYMPH_ANGIOGENESIS_PATHWAY	25	0.54412	1.31495	0.103093	0.221952	1	2228	tags=40%, list=14%, signal=46%
KEGG_PYRIMIDINE_METABOLISM	94	0.425599	1.31389	0.0706922	0.222925	1	4510	tags=39%, list=28%, signal=55%
REACTOME_DISEASES_OF_GLYCOSYLATION	131	0.409839	1.31059	0.0489209	0.227224	1	2720	tags=27%, list=17%, signal=33%
REACTOME_MITOTIC_G1_PHASE_AND_G1_S_TRANSITION	148	0.40199	1.30993	0.0455213	0.227621	1	4277	tags=34%, list=27%, signal=46%
PID_IL3_PATHWAY	24	0.541394	1.30986	0.118761	0.227141	1	2601	tags=42%, list=16%, signal=50%
REACTOME_TGF_BETA_RECEPTOR_SIGNALING_IN_EMT_EPITHELIAL_TO_MESENCHYMAL_TRANSITION	16	0.578956	1.30841	0.106618	0.228657	1	1449	tags=38%, list=9%, signal=41%
REACTOME_DISEASES_OF_METABOLISM	215	0.386253	1.30362	0.0275103	0.235156	1	2720	tags=27%, list=17%, signal=32%
PID_ANGIOPOIETIN_RECEPTOR_PATHWAY	45	0.4767	1.3021	0.100494	0.236906	1	2163	tags=29%, list=14%, signal=33%
REACTOME_SIGNALING_BY_PDGFR_IN_DISEASE	20	0.553167	1.29953	0.135739	0.240191	1	1222	tags=20%, list=8%, signal=22%
REACTOME_METABOLISM_OF_VITAMINS_AND_COFACTORS	167	0.390667	1.29095	0.0398818	0.252859	1	3329	tags=28%, list=21%, signal=35%
KEGG_GLYCOSAMINOGLYCAN_DEGRADATION	19	0.5538	1.28643	0.140288	0.259263	1	1557	tags=32%, list=10%, signal=35%
BIOCARTA_ECM_PATHWAY	18	0.560765	1.28623	0.141748	0.258879	1	1509	tags=28%, list=9%, signal=31%
PID_IFNG_PATHWAY	39	0.482872	1.28445	0.118443	0.26105	1	1233	tags=23%, list=8%, signal=25%
REACTOME_CD209_DC_SIGN_SIGNALING	20	0.541839	1.28341	0.13587	0.262111	1	924	tags=25%, list=6%, signal=27%
PID_CD40_PATHWAY	26	0.512561	1.28229	0.134948	0.263209	1	1703	tags=38%, list=11%, signal=43%
PID_SMAD2_3NUCLEAR_PATHWAY	76	0.427619	1.27959	0.0719755	0.267007	1	2780	tags=26%, list=17%, signal=32%
REACTOME_INTERLEUKIN_7_SIGNALING	26	0.512937	1.27892	0.16145	0.267481	1	1558	tags=35%, list=10%, signal=38%
REACTOME_UB_SPECIFIC_PROCESSING_PROTEASES	176	0.38341	1.27862	0.0406162	0.267263	1	3818	tags=30%, list=24%, signal=39%
REACTOME_G_BETA_GAMMA_SIGNALLING_THROUGH_PI3KGAMMA	22	0.527534	1.2772	0.138489	0.268835	1	1682	tags=41%, list=11%, signal=46%
REACTOME_ECM_PROTEOGLYCANS	70	0.425991	1.27519	0.106858	0.271458	1	3420	tags=43%, list=21%, signal=54%
KEGG_FOCAL_ADHESION	189	0.376507	1.27335	0.0443828	0.273882	1	3294	tags=37%, list=21%, signal=45%
REACTOME_TOLL_LIKE_RECEPTOR_10_TLR10_CASCADE	83	0.421988	1.27207	0.0874404	0.275372	1	2428	tags=29%, list=15%, signal=34%
KEGG_GLYCOLYSIS_GLUCONEOGENESIS	45	0.461459	1.27182	0.127907	0.275114	1	913	tags=16%, list=6%, signal=16%
KEGG_DNA_REPLICATION	35	0.486524	1.27148	0.122378	0.274988	1	4246	tags=29%, list=27%, signal=39%
REACTOME_INTRINSIC_PATHWAY_OF_FIBRIN_CLOT_FORMATION	15	0.56861	1.27141	0.143119	0.274411	1	3498	tags=53%, list=22%, signal=68%
REACTOME_G_ALPHA_I_SIGNALLING_EVENTS	297	0.36704	1.27078	0.0274869	0.274739	1	1682	tags=21%, list=11%, signal=23%
REACTOME_RHO_GTPASE_EFFECTORS	282	0.363205	1.27077	0.0232558	0.274053	1	1198	tags=11%, list=8%, signal=12%
PID_TAP63_PATHWAY	48	0.453123	1.2703	0.102473	0.274155	1	4319	tags=44%, list=27%, signal=60%
REACTOME_SIGNALING_BY_VEGF	104	0.409638	1.26837	0.0788643	0.276782	1	2523	tags=28%, list=16%, signal=33%
REACTOME_RECOGNITION_OF_DNA_DAMAGE_BY_PCNA_CONTAINING_REPLICATION_COMPLEX	30	0.493966	1.26446	0.144828	0.282922	1	4133	tags=43%, list=26%, signal=58%
REACTOME_PI3K_AKT_SIGNALING_IN_CANCER	89	0.410569	1.26231	0.100471	0.286014	1	1545	tags=16%, list=10%, signal=17%
REACTOME_ASPARAGINE_N_LINKED_GLYCOSYLATION	288	0.361766	1.26208	0.0388601	0.285679	1	2889	tags=29%, list=18%, signal=35%
PID_EPHRINB_REV_PATHWAY	26	0.508701	1.26132	0.166951	0.28625	1	496	tags=15%, list=3%, signal=16%
BIOCARTA_P38MAPK_PATHWAY	36	0.482786	1.26002	0.142857	0.287774	1	2260	tags=33%, list=14%, signal=39%
REACTOME_SPHINGOLIPID_METABOLISM	83	0.414406	1.2592	0.0832049	0.288508	1	2475	tags=31%, list=16%, signal=37%
BIOCARTA_TOLL_PATHWAY	24	0.520972	1.25862	0.1331	0.288768	1	2163	tags=38%, list=14%, signal=43%
PID_TGFBR_PATHWAY	54	0.447042	1.25643	0.124595	0.291843	1	2327	tags=26%, list=15%, signal=30%
REACTOME_SIGNALING_BY_PDGF	54	0.44081	1.2532	0.109325	0.296816	1	3311	tags=37%, list=21%, signal=47%
PID_P73PATHWAY	77	0.415609	1.25285	0.11828	0.296751	1	3500	tags=29%, list=22%, signal=36%
KEGG_BASE_EXCISION_REPAIR	33	0.485088	1.25102	0.14214	0.299338	1	1172	tags=12%, list=7%, signal=13%
REACTOME_ACYL_CHAIN_REMODELLING_OF_PC	18	0.551498	1.24309	0.168142	0.312761	1	2064	tags=39%, list=13%, signal=45%
REACTOME_FATTY_ACID_METABOLISM	150	0.381127	1.24179	0.0740741	0.314326	1	3491	tags=27%, list=22%, signal=34%
REACTOME_NUCLEOBASE_CATABOLISM	29	0.48987	1.24173	0.17637	0.313701	1	2232	tags=24%, list=14%, signal=28%
PID_ANTHRAX_PATHWAY	17	0.546721	1.23851	0.189394	0.318804	1	168	tags=12%, list=1%, signal=12%
REACTOME_LATE_ENDOSOMAL_MICROAUTOPHAGY	33	0.474562	1.23837	0.16696	0.318264	1	4231	tags=48%, list=27%, signal=66%
REACTOME_PROCESSIVE_SYNTHESIS_ON_THE_LAGGING_STRAND	15	0.56184	1.23669	0.211503	0.320475	1	4133	tags=33%, list=26%, signal=45%
PID_SYNDECAN_2_PATHWAY	30	0.484999	1.23417	0.168067	0.324465	1	2840	tags=40%, list=18%, signal=49%
REACTOME_RHO_GTPASE_CYCLE	137	0.38518	1.23332	0.0895522	0.325235	1	637	tags=12%, list=4%, signal=12%
REACTOME_LAGGING_STRAND_SYNTHESIS	20	0.528509	1.2332	0.185714	0.324692	1	4133	tags=30%, list=26%, signal=40%
REACTOME_DEUBIQUITINATION	251	0.360682	1.2317	0.0545213	0.326595	1	2934	tags=22%, list=18%, signal=27%
KEGG_P53_SIGNALING_PATHWAY	67	0.409803	1.23114	0.123824	0.326834	1	2865	tags=22%, list=18%, signal=27%
KEGG_EPITHELIAL_CELL_SIGNALING_IN_HELICOBACTER_PYLORI_INFECTION	66	0.41991	1.23034	0.1146	0.327542	1	3144	tags=39%, list=20%, signal=49%
REACTOME_ABC_FAMILY_PROTEINS_MEDIATED_TRANSPORT	97	0.402682	1.22896	0.107829	0.329349	1	3650	tags=38%, list=23%, signal=49%
REACTOME_EPHB_MEDIATED_FORWARD_SIGNALING	42	0.450322	1.22885	0.162252	0.328786	1	1555	tags=24%, list=10%, signal=26%
BIOCARTA_TFF_PATHWAY	20	0.532135	1.2265	0.197183	0.332284	1	2298	tags=25%, list=14%, signal=29%
PID_P38_ALPHA_BETA_PATHWAY	29	0.489641	1.22609	0.170732	0.332358	1	722	tags=17%, list=5%, signal=18%
BIOCARTA_MAPK_PATHWAY	80	0.413603	1.22594	0.147854	0.33187	1	1936	tags=24%, list=12%, signal=27%
REACTOME_DEGRADATION_OF_BETA_CATENIN_BY_THE_DESTRUCTION_COMPLEX	83	0.400799	1.22549	0.117647	0.331925	1	3650	tags=41%, list=23%, signal=53%
KEGG_PPAR_SIGNALING_PATHWAY	54	0.431059	1.22433	0.145396	0.333333	1	1773	tags=24%, list=11%, signal=27%
REACTOME_SEMAPHORIN_INTERACTIONS	64	0.41733	1.22344	0.147619	0.334176	1	1465	tags=22%, list=9%, signal=24%
PID_RHOA_REG_PATHWAY	46	0.440033	1.22339	0.173175	0.333516	1	1157	tags=15%, list=7%, signal=16%
PID_PRL_SIGNALING_EVENTS_PATHWAY	23	0.490196	1.21991	0.190037	0.339425	1	3443	tags=39%, list=22%, signal=50%
REACTOME_MTORC1_MEDIATED_SIGNALLING	23	0.494328	1.2199	0.200686	0.338665	1	3710	tags=35%, list=23%, signal=45%
REACTOME_TELOMERE_C_STRAND_LAGGING_STRAND_SYNTHESIS	28	0.494312	1.21938	0.186257	0.338845	1	4133	tags=32%, list=26%, signal=43%
REACTOME_METABOLISM_OF_NUCLEOTIDES	91	0.393269	1.21557	0.146789	0.345156	1	3596	tags=26%, list=23%, signal=34%
BIOCARTA_GH_PATHWAY	25	0.500077	1.21487	0.221465	0.345682	1	1509	tags=24%, list=9%, signal=26%
REACTOME_GAB1_SIGNALOSOME	15	0.555955	1.21462	0.229323	0.345408	1	1545	tags=27%, list=10%, signal=30%
PID_CXCR3_PATHWAY	41	0.455386	1.21368	0.168053	0.346517	1	933	tags=22%, list=6%, signal=23%
KEGG_DRUG_METABOLISM_CYTOCHROME_P450	30	0.482997	1.2119	0.187817	0.349032	1	3060	tags=37%, list=19%, signal=45%
REACTOME_SYNTHESIS_OF_SUBSTRATES_IN_N_GLYCAN_BIOSYTHESIS	62	0.418683	1.20977	0.167702	0.352305	1	2722	tags=31%, list=17%, signal=37%
REACTOME_DEATH_RECEPTOR_SIGNALLING	139	0.372366	1.20468	0.107759	0.361506	1	1701	tags=20%, list=11%, signal=22%
PID_CERAMIDE_PATHWAY	44	0.444486	1.20336	0.166384	0.363259	1	1891	tags=30%, list=12%, signal=33%
REACTOME_TRANS_GOLGI_NETWORK_VESICLE_BUDDING	71	0.406736	1.19933	0.167457	0.370618	1	2004	tags=23%, list=13%, signal=26%
REACTOME_HOMOLOGOUS_DNA_PAIRING_AND_STRAND_EXCHANGE	42	0.441342	1.19874	0.154499	0.371015	1	5199	tags=33%, list=33%, signal=49%
REACTOME_BIOLOGICAL_OXIDATIONS	145	0.364308	1.19701	0.129125	0.373552	1	2959	tags=26%, list=19%, signal=32%
REACTOME_TRANSCRIPTIONAL_REGULATION_BY_RUNX1	200	0.357533	1.19387	0.11126	0.37914	1	2552	tags=21%, list=16%, signal=25%
REACTOME_NON_INTEGRIN_MEMBRANE_ECM_INTERACTIONS	58	0.409958	1.19378	0.181675	0.378481	1	3561	tags=47%, list=22%, signal=60%
REACTOME_PLATELET_SENSITIZATION_BY_LDL	17	0.523084	1.1919	0.232601	0.381554	1	2163	tags=29%, list=14%, signal=34%
REACTOME_GLOBAL_GENOME_NUCLEOTIDE_EXCISION_REPAIR_GG_NER	84	0.39452	1.19176	0.170616	0.381005	1	4137	tags=37%, list=26%, signal=50%
KEGG_NICOTINATE_AND_NICOTINAMIDE_METABOLISM	23	0.493777	1.1915	0.207904	0.380694	1	2858	tags=35%, list=18%, signal=42%
KEGG_GLYCOSPHINGOLIPID_BIOSYNTHESIS_GANGLIO_SERIES	15	0.546831	1.19146	0.230174	0.379939	1	1593	tags=27%, list=10%, signal=30%
BIOCARTA_BCELLSURVIVAL_PATHWAY	15	0.545492	1.19134	0.25	0.379348	1	975	tags=20%, list=6%, signal=21%
BIOCARTA_ERAD_PATHWAY	19	0.516056	1.19096	0.225919	0.379333	1	3549	tags=47%, list=22%, signal=61%
REACTOME_PEROXISOMAL_PROTEIN_IMPORT	60	0.413693	1.18961	0.160393	0.381197	1	3615	tags=33%, list=23%, signal=43%
REACTOME_HDR_THROUGH_SINGLE_STRAND_ANNEALING_SSA	37	0.445045	1.18928	0.194676	0.381038	1	5199	tags=32%, list=33%, signal=48%
BIOCARTA_HER2_PATHWAY	23	0.495311	1.18814	0.227027	0.382452	1	1509	tags=26%, list=9%, signal=29%
KEGG_GLYCOSYLPHOSPHATIDYLINOSITOL_GPI_ANCHOR_BIOSYNTHESIS	25	0.482793	1.18686	0.237931	0.384281	1	1739	tags=20%, list=11%, signal=22%
BIOCARTA_TNFR1_PATHWAY	29	0.477415	1.18451	0.217926	0.387934	1	1268	tags=21%, list=8%, signal=22%
REACTOME_SYNTHESIS_OF_ACTIVE_UBIQUITIN_ROLES_OF_E1_AND_E2_ENZYMES	30	0.465566	1.18267	0.217172	0.390946	1	3985	tags=37%, list=25%, signal=49%
PID_VEGFR1_2_PATHWAY	68	0.405521	1.18179	0.175824	0.391987	1	2298	tags=28%, list=14%, signal=33%
REACTOME_ACYL_CHAIN_REMODELLING_OF_PE	19	0.516161	1.18062	0.236427	0.393451	1	2064	tags=37%, list=13%, signal=42%
KEGG_PEROXISOME	74	0.392472	1.18046	0.181538	0.392974	1	3481	tags=26%, list=22%, signal=33%
REACTOME_SLC_TRANSPORTER_DISORDERS	74	0.396925	1.17693	0.196541	0.399658	1	3253	tags=24%, list=20%, signal=30%
REACTOME_METABOLISM_OF_CARBOHYDRATES	271	0.337842	1.17644	0.102122	0.399815	1	2383	tags=18%, list=15%, signal=21%
PID_HNF3A_PATHWAY	33	0.450416	1.17558	0.21843	0.400852	1	1687	tags=15%, list=11%, signal=17%
KEGG_PROTEIN_EXPORT	23	0.477071	1.17081	0.243728	0.409972	1	3343	tags=61%, list=21%, signal=77%
REACTOME_NONSENSE_MEDIATED_DECAY_NMD	113	0.369515	1.17004	0.161527	0.410734	1	5934	tags=59%, list=37%, signal=94%
REACTOME_COLLAGEN_BIOSYNTHESIS_AND_MODIFYING_ENZYMES	65	0.397245	1.16823	0.201939	0.413762	1	2986	tags=43%, list=19%, signal=53%
BIOCARTA_ATRBRCA_PATHWAY	22	0.488353	1.16646	0.258537	0.416715	1	5805	tags=36%, list=36%, signal=57%
REACTOME_TRANSCRIPTIONAL_REGULATION_BY_VENTX	38	0.443825	1.1664	0.225859	0.415944	1	3118	tags=34%, list=20%, signal=42%
SIG_IL4RECEPTOR_IN_B_LYPHOCYTES	27	0.47118	1.16458	0.217391	0.418971	1	1509	tags=22%, list=9%, signal=25%
REACTOME_PLATELET_AGGREGATION_PLUG_FORMATION	32	0.452525	1.1645	0.251282	0.418265	1	3227	tags=41%, list=20%, signal=51%
REACTOME_DNA_STRAND_ELONGATION	32	0.453896	1.16236	0.234458	0.421934	1	4133	tags=19%, list=26%, signal=25%
BIOCARTA_ETS_PATHWAY	17	0.514187	1.16222	0.263525	0.421378	1	446	tags=12%, list=3%, signal=12%
PID_ILK_PATHWAY	45	0.418736	1.16194	0.218153	0.421085	1	2552	tags=24%, list=16%, signal=29%
SA_TRKA_RECEPTOR	17	0.519871	1.15804	0.280072	0.428904	1	2703	tags=29%, list=17%, signal=35%
REACTOME_INTEGRIN_SIGNALING	24	0.459996	1.15583	0.274021	0.43274	1	3227	tags=46%, list=20%, signal=57%
REACTOME_TRANSLESION_SYNTHESIS_BY_POLH	19	0.492428	1.15435	0.27993	0.435275	1	6127	tags=63%, list=38%, signal=102%
REACTOME_RRNA_MODIFICATION_IN_THE_NUCLEUS_AND_CYTOSOL	60	0.399432	1.15386	0.219904	0.435494	1	4836	tags=37%, list=30%, signal=52%
REACTOME_THROMBOXANE_SIGNALLING_THROUGH_TP_RECEPTOR	21	0.48075	1.15331	0.250936	0.435759	1	1682	tags=33%, list=11%, signal=37%
REACTOME_TGF_BETA_RECEPTOR_SIGNALING_ACTIVATES_SMADS	32	0.446369	1.15023	0.245009	0.441691	1	2237	tags=28%, list=14%, signal=33%
KEGG_CHRONIC_MYELOID_LEUKEMIA	72	0.382411	1.14995	0.205255	0.441325	1	2000	tags=19%, list=13%, signal=22%
PID_INTEGRIN_A4B1_PATHWAY	32	0.441123	1.14953	0.256536	0.441384	1	2529	tags=34%, list=16%, signal=41%
REACTOME_SENESCENCE_ASSOCIATED_SECRETORY_PHENOTYPE_SASP	83	0.379919	1.1494	0.20827	0.440788	1	3681	tags=30%, list=23%, signal=39%
REACTOME_IRON_UPTAKE_AND_TRANSPORT	55	0.407	1.14632	0.232595	0.446563	1	1318	tags=15%, list=8%, signal=16%
KEGG_ADHERENS_JUNCTION	71	0.38401	1.14423	0.235669	0.450227	1	2539	tags=23%, list=16%, signal=27%
REACTOME_PTEN_REGULATION	137	0.353508	1.14336	0.197674	0.451319	1	3759	tags=36%, list=24%, signal=47%
REACTOME_RHO_GTPASES_ACTIVATE_ROCKS	19	0.49799	1.14008	0.280763	0.457653	1	2552	tags=42%, list=16%, signal=50%
BIOCARTA_RAC1_PATHWAY	20	0.480699	1.13992	0.298587	0.457036	1	412	tags=15%, list=3%, signal=15%
PID_ALK1_PATHWAY	24	0.468792	1.13883	0.291809	0.458555	1	1843	tags=33%, list=12%, signal=38%
REACTOME_IL_6_TYPE_CYTOKINE_RECEPTOR_LIGAND_INTERACTIONS	15	0.523699	1.13562	0.322581	0.464668	1	2805	tags=53%, list=18%, signal=65%
REACTOME_CELL_CELL_COMMUNICATION	110	0.359575	1.13505	0.198767	0.464922	1	2298	tags=22%, list=14%, signal=25%
REACTOME_POLYMERASE_SWITCHING_ON_THE_C_STRAND_OF_THE_TELOMERE	17	0.495549	1.13039	0.298025	0.47477	1	322	tags=6%, list=2%, signal=6%
REACTOME_NUCLEOTIDE_SALVAGE	22	0.479767	1.12766	0.29432	0.480037	1	3566	tags=36%, list=22%, signal=47%
REACTOME_PLASMA_LIPOPROTEIN_REMODELING	20	0.481989	1.12708	0.30541	0.4805	1	3352	tags=45%, list=21%, signal=57%
BIOCARTA_FMLP_PATHWAY	33	0.436135	1.12692	0.270758	0.479914	1	1308	tags=21%, list=8%, signal=23%
BIOCARTA_KERATINOCYTE_PATHWAY	45	0.405002	1.12512	0.28988	0.482935	1	1839	tags=29%, list=12%, signal=33%
BIOCARTA_SPPA_PATHWAY	15	0.508427	1.12456	0.318099	0.483312	1	961	tags=27%, list=6%, signal=28%
PID_ECADHERIN_KERATINOCYTE_PATHWAY	20	0.48981	1.12412	0.301248	0.483425	1	2298	tags=25%, list=14%, signal=29%
REACTOME_GLYCOSAMINOGLYCAN_METABOLISM	119	0.356277	1.12397	0.231672	0.482798	1	3374	tags=31%, list=21%, signal=39%
PID_ARF6_TRAFFICKING_PATHWAY	47	0.408057	1.12322	0.266223	0.483677	1	2298	tags=28%, list=14%, signal=32%
REACTOME_RUNX2_REGULATES_OSTEOBLAST_DIFFERENTIATION	22	0.46848	1.12314	0.299308	0.482899	1	2000	tags=27%, list=13%, signal=31%
REACTOME_SMAD2_SMAD3_SMAD4_HETEROTRIMER_REGULATES_TRANSCRIPTION	31	0.427999	1.12135	0.293194	0.486113	1	3985	tags=32%, list=25%, signal=43%
REACTOME_G_ALPHA_Q_SIGNALLING_EVENTS	158	0.342128	1.12065	0.222222	0.486764	1	1740	tags=18%, list=11%, signal=20%
REACTOME_NUCLEOTIDE_EXCISION_REPAIR	110	0.355504	1.11747	0.255639	0.493146	1	4143	tags=35%, list=26%, signal=48%
BIOCARTA_HCMV_PATHWAY	17	0.490481	1.11592	0.298479	0.495763	1	2163	tags=29%, list=14%, signal=34%
REACTOME_APC_C_CDC20_MEDIATED_DEGRADATION_OF_CYCLIN_B	23	0.46715	1.11373	0.322404	0.500025	1	3985	tags=35%, list=25%, signal=46%
REACTOME_SURFACTANT_METABOLISM	25	0.464808	1.11244	0.286449	0.502064	1	2180	tags=24%, list=14%, signal=28%
BIOCARTA_EFP_PATHWAY	16	0.491774	1.11143	0.32316	0.503301	1	3443	tags=38%, list=22%, signal=48%
REACTOME_THROMBIN_SIGNALLING_THROUGH_PROTEINASE_ACTIVATED_RECEPTORS_PARS	28	0.443118	1.11047	0.31746	0.504528	1	1682	tags=25%, list=11%, signal=28%
REACTOME_LYSOSOME_VESICLE_BIOGENESIS	34	0.42345	1.10983	0.293624	0.504996	1	1872	tags=24%, list=12%, signal=27%
REACTOME_TRANSCRIPTION_COUPLED_NUCLEOTIDE_EXCISION_REPAIR_TC_NER	78	0.36806	1.10964	0.273011	0.504496	1	4281	tags=40%, list=27%, signal=54%
REACTOME_RRNA_PROCESSING	200	0.331663	1.1096	0.21914	0.503607	1	5934	tags=52%, list=37%, signal=83%
BIOCARTA_BCR_PATHWAY	33	0.431541	1.10949	0.302285	0.502888	1	213	tags=12%, list=1%, signal=12%
REACTOME_SIGNAL_AMPLIFICATION	29	0.440771	1.10846	0.314815	0.504386	1	2163	tags=34%, list=14%, signal=40%
KEGG_ADIPOCYTOKINE_SIGNALING_PATHWAY	59	0.384911	1.10493	0.285484	0.511418	1	1599	tags=22%, list=10%, signal=24%
PID_TELOMERASE_PATHWAY	65	0.377105	1.10373	0.304897	0.513251	1	2697	tags=20%, list=17%, signal=24%
BIOCARTA_ARF_PATHWAY	17	0.486869	1.10346	0.321561	0.512907	1	3144	tags=24%, list=20%, signal=29%
BIOCARTA_RAS_PATHWAY	22	0.465823	1.1016	0.337248	0.516202	1	1555	tags=18%, list=10%, signal=20%
PID_NECTIN_PATHWAY	30	0.426852	1.09697	0.313485	0.526254	1	3294	tags=50%, list=21%, signal=63%
REACTOME_MET_PROMOTES_CELL_MOTILITY	40	0.404587	1.09682	0.30384	0.525598	1	3561	tags=48%, list=22%, signal=61%
REACTOME_GLYCOGEN_SYNTHESIS	15	0.485299	1.09653	0.330896	0.525193	1	4229	tags=53%, list=27%, signal=73%
PID_ERBB1_RECEPTOR_PROXIMAL_PATHWAY	35	0.41173	1.09535	0.31453	0.527058	1	1545	tags=20%, list=10%, signal=22%
REACTOME_METABOLISM_OF_STEROID_HORMONES	23	0.450577	1.08771	0.348375	0.544324	1	2557	tags=30%, list=16%, signal=36%
REACTOME_SIGNALING_BY_TGF_BETA_RECEPTOR_COMPLEX	72	0.367677	1.08702	0.296012	0.544887	1	2318	tags=22%, list=15%, signal=26%
PID_P75_NTR_PATHWAY	63	0.372574	1.08663	0.307812	0.544726	1	3144	tags=33%, list=20%, signal=41%
REACTOME_TRANSCRIPTIONAL_REGULATION_OF_PLURIPOTENT_STEM_CELLS	24	0.442333	1.08602	0.335125	0.545204	1	1526	tags=17%, list=10%, signal=18%
REACTOME_SNRNP_ASSEMBLY	54	0.385835	1.08586	0.318555	0.544587	1	4730	tags=33%, list=30%, signal=47%
KEGG_NUCLEOTIDE_EXCISION_REPAIR	43	0.402528	1.08506	0.329431	0.545561	1	4133	tags=33%, list=26%, signal=44%
REACTOME_DUAL_INCISION_IN_GG_NER	41	0.403398	1.08462	0.325301	0.5456	1	4133	tags=41%, list=26%, signal=56%
REACTOME_DISEASES_OF_CARBOHYDRATE_METABOLISM	30	0.424665	1.08372	0.326765	0.546894	1	4229	tags=53%, list=27%, signal=72%
REACTOME_NOTCH3_INTRACELLULAR_DOMAIN_REGULATES_TRANSCRIPTION	25	0.442552	1.08246	0.358156	0.548858	1	1240	tags=16%, list=8%, signal=17%
REACTOME_N_GLYCAN_TRIMMING_IN_THE_ER_AND_CALNEXIN_CALRETICULIN_CYCLE	35	0.41387	1.07947	0.361842	0.555272	1	3996	tags=43%, list=25%, signal=57%
REACTOME_ADP_SIGNALLING_THROUGH_P2Y_PURINOCEPTOR_1	22	0.45276	1.07909	0.353153	0.555161	1	2163	tags=36%, list=14%, signal=42%
PID_ARF_3PATHWAY	19	0.472406	1.07814	0.341727	0.556421	1	39	tags=5%, list=0%, signal=5%
PID_ARF6_PATHWAY	34	0.410056	1.07535	0.34106	0.562144	1	2307	tags=29%, list=14%, signal=34%
REACTOME_E3_UBIQUITIN_LIGASES_UBIQUITINATE_TARGET_PROTEINS	51	0.382726	1.07444	0.317568	0.563317	1	3985	tags=37%, list=25%, signal=50%
REACTOME_AMYLOID_FIBER_FORMATION	69	0.368593	1.07114	0.329094	0.570358	1	3842	tags=30%, list=24%, signal=40%
REACTOME_SIGNALING_BY_CYTOSOLIC_FGFR1_FUSION_MUTANTS	18	0.464886	1.06867	0.363799	0.575584	1	1226	tags=22%, list=8%, signal=24%
KEGG_STEROID_HORMONE_BIOSYNTHESIS	22	0.439435	1.06551	0.359019	0.582205	1	3967	tags=36%, list=25%, signal=48%
REACTOME_INTERLEUKIN_17_SIGNALING	66	0.361922	1.06527	0.340836	0.581715	1	2428	tags=27%, list=15%, signal=32%
BIOCARTA_STATHMIN_PATHWAY	19	0.457868	1.06493	0.369449	0.581501	1	943	tags=26%, list=6%, signal=28%
REACTOME_TRIGLYCERIDE_CATABOLISM	18	0.463124	1.0634	0.369369	0.584036	1	2249	tags=39%, list=14%, signal=45%
KEGG_COLORECTAL_CANCER	61	0.366795	1.06249	0.352941	0.585207	1	1134	tags=13%, list=7%, signal=14%
REACTOME_CHAPERONE_MEDIATED_AUTOPHAGY	21	0.457987	1.06237	0.393773	0.584449	1	3985	tags=48%, list=25%, signal=63%
PID_DELTA_NP63_PATHWAY	43	0.387242	1.06228	0.359401	0.583583	1	2679	tags=30%, list=17%, signal=36%
REACTOME_SIGNALING_BY_MET	78	0.350724	1.05688	0.344615	0.596156	1	4163	tags=42%, list=26%, signal=57%
REACTOME_TRANSLESION_SYNTHESIS_BY_POLK	17	0.465133	1.05431	0.405172	0.601362	1	4129	tags=47%, list=26%, signal=63%
REACTOME_TRANSFERRIN_ENDOCYTOSIS_AND_RECYCLING	30	0.424001	1.05392	0.383929	0.601277	1	597	tags=13%, list=4%, signal=14%
BIOCARTA_TPO_PATHWAY	23	0.441672	1.05378	0.410526	0.600572	1	1509	tags=22%, list=9%, signal=24%
REACTOME_PROTEIN_UBIQUITINATION	71	0.35546	1.05084	0.376582	0.606808	1	3985	tags=32%, list=25%, signal=43%
PID_S1P_META_PATHWAY	21	0.444522	1.04909	0.394107	0.61012	1	1026	tags=19%, list=6%, signal=20%
KEGG_PENTOSE_PHOSPHATE_PATHWAY	23	0.442713	1.04757	0.423143	0.612723	1	2597	tags=30%, list=16%, signal=36%
REACTOME_METABOLIC_DISORDERS_OF_BIOLOGICAL_OXIDATION_ENZYMES	27	0.416533	1.04631	0.39115	0.614663	1	2914	tags=37%, list=18%, signal=45%
SIG_INSULIN_RECEPTOR_PATHWAY_IN_CARDIAC_MYOCYTES	49	0.378738	1.04575	0.384615	0.614975	1	1555	tags=14%, list=10%, signal=16%
REACTOME_SIGNALING_BY_EGFR_IN_CANCER	23	0.437718	1.04327	0.404293	0.620063	1	1545	tags=17%, list=10%, signal=19%
REACTOME_SIGNALING_BY_ROBO_RECEPTORS	210	0.30949	1.04248	0.357534	0.620885	1	4575	tags=40%, list=29%, signal=55%
REACTOME_GOLGI_ASSOCIATED_VESICLE_BIOGENESIS	55	0.366726	1.04104	0.387584	0.623504	1	2004	tags=22%, list=13%, signal=25%
REACTOME_DUAL_INCISION_IN_TC_NER	65	0.35462	1.04091	0.384137	0.622757	1	4281	tags=37%, list=27%, signal=50%
PID_RB_1PATHWAY	61	0.358625	1.03961	0.384252	0.624814	1	2300	tags=18%, list=14%, signal=21%
REACTOME_APOPTOTIC_FACTOR_MEDIATED_RESPONSE	18	0.454505	1.0383	0.413732	0.627024	1	3157	tags=39%, list=20%, signal=48%
KEGG_VEGF_SIGNALING_PATHWAY	64	0.353294	1.03729	0.38	0.628459	1	2260	tags=25%, list=14%, signal=29%
BIOCARTA_RHO_PATHWAY	20	0.442274	1.03572	0.414634	0.631193	1	1134	tags=15%, list=7%, signal=16%
REACTOME_IRE1ALPHA_ACTIVATES_CHAPERONES	50	0.371378	1.0355	0.398703	0.630568	1	2803	tags=34%, list=18%, signal=41%
REACTOME_CALNEXIN_CALRETICULIN_CYCLE	26	0.422364	1.03541	0.407473	0.629649	1	3985	tags=46%, list=25%, signal=61%
REACTOME_HEDGEHOG_OFF_STATE	107	0.332643	1.03537	0.381657	0.628642	1	4277	tags=41%, list=27%, signal=56%
BIOCARTA_ERK_PATHWAY	26	0.419291	1.03487	0.405546	0.628761	1	1509	tags=19%, list=9%, signal=21%
PID_REG_GR_PATHWAY	68	0.348287	1.03327	0.379095	0.6315	1	964	tags=13%, list=6%, signal=14%
REACTOME_CHONDROITIN_SULFATE_BIOSYNTHESIS	20	0.431679	1.03221	0.412523	0.633044	1	2862	tags=30%, list=18%, signal=37%
REACTOME_DEADENYLATION_OF_MRNA	25	0.422918	1.02997	0.397436	0.637472	1	4903	tags=44%, list=31%, signal=63%
REACTOME_GLYCOGEN_BREAKDOWN_GLYCOGENOLYSIS	15	0.463635	1.02993	0.439201	0.636485	1	841	tags=20%, list=5%, signal=21%
PID_LYSOPHOSPHOLIPID_PATHWAY	64	0.357303	1.02975	0.401349	0.635838	1	1672	tags=19%, list=10%, signal=21%
SIG_CHEMOTAXIS	43	0.381639	1.02973	0.425676	0.634778	1	801	tags=14%, list=5%, signal=15%
BIOCARTA_ARAP_PATHWAY	17	0.454805	1.02909	0.402174	0.635297	1	54	tags=6%, list=0%, signal=6%
REACTOME_DNA_DAMAGE_RECOGNITION_IN_GG_NER	38	0.388932	1.02832	0.429319	0.636083	1	4137	tags=42%, list=26%, signal=57%
REACTOME_MET_ACTIVATES_PTK2_SIGNALING	30	0.401093	1.02597	0.411765	0.640868	1	3561	tags=50%, list=22%, signal=64%
REACTOME_SULFUR_AMINO_ACID_METABOLISM	25	0.423334	1.02489	0.415631	0.642451	1	1731	tags=16%, list=11%, signal=18%
REACTOME_TRANSPORT_TO_THE_GOLGI_AND_SUBSEQUENT_MODIFICATION	172	0.309288	1.02431	0.401961	0.64278	1	2725	tags=27%, list=17%, signal=32%
PID_S1P_S1P3_PATHWAY	28	0.407845	1.0229	0.433442	0.645044	1	3294	tags=43%, list=21%, signal=54%
PID_BARD1_PATHWAY	29	0.406511	1.02245	0.430293	0.644989	1	5371	tags=34%, list=34%, signal=52%
REACTOME_CHONDROITIN_SULFATE_DERMATAN_SULFATE_METABOLISM	50	0.362683	1.02224	0.417492	0.644439	1	2339	tags=22%, list=15%, signal=26%
REACTOME_DOWNREGULATION_OF_TGF_BETA_RECEPTOR_SIGNALING	26	0.420097	1.02173	0.430293	0.644613	1	2237	tags=27%, list=14%, signal=31%
REACTOME_CYTOSOLIC_TRNA_AMINOACYLATION	24	0.406959	1.01417	0.433862	0.662303	1	3590	tags=25%, list=23%, signal=32%
REACTOME_APOPTOTIC_CLEAVAGE_OF_CELLULAR_PROTEINS	35	0.384792	1.01308	0.454713	0.663934	1	2857	tags=34%, list=18%, signal=42%
REACTOME_TP53_REGULATES_TRANSCRIPTION_OF_GENES_INVOLVED_IN_G2_CELL_CYCLE_ARREST	18	0.450258	1.01285	0.456364	0.663317	1	3891	tags=33%, list=24%, signal=44%
REACTOME_RESOLUTION_OF_AP_SITES_VIA_THE_MULTIPLE_NUCLEOTIDE_PATCH_REPLACEMENT_PATHWAY	25	0.410279	1.01182	0.442708	0.664762	1	4133	tags=36%, list=26%, signal=49%
BIOCARTA_SPRY_PATHWAY	17	0.446226	1.01153	0.446809	0.664367	1	1545	tags=18%, list=10%, signal=20%
KEGG_HISTIDINE_METABOLISM	24	0.415007	1.01105	0.439421	0.664487	1	4219	tags=33%, list=26%, signal=45%
REACTOME_RAB_GEFS_EXCHANGE_GTP_FOR_GDP_ON_RABS	90	0.331143	1.00847	0.442724	0.669698	1	2325	tags=18%, list=15%, signal=21%
PID_A6B1_A6B4_INTEGRIN_PATHWAY	46	0.364582	1.00658	0.461157	0.673287	1	3593	tags=35%, list=23%, signal=45%
REACTOME_SIGNALING_BY_HEDGEHOG	143	0.308338	1.00421	0.445783	0.678122	1	2436	tags=19%, list=15%, signal=22%
REACTOME_GAMMA_CARBOXYLATION_HYPUSINE_FORMATION_AND_ARYLSULFATASE_ACTIVATION	34	0.389699	1.00388	0.472509	0.677843	1	3145	tags=35%, list=20%, signal=44%
NABA_BASEMENT_MEMBRANES	38	0.376333	1.00377	0.451923	0.676954	1	3561	tags=45%, list=22%, signal=57%
REACTOME_CROSSLINKING_OF_COLLAGEN_FIBRILS	18	0.439674	1.00342	0.464865	0.676731	1	3748	tags=56%, list=24%, signal=73%
REACTOME_TRANSCRIPTIONAL_REGULATION_OF_WHITE_ADIPOCYTE_DIFFERENTIATION	81	0.333364	1.00285	0.445277	0.67696	1	1674	tags=16%, list=10%, signal=18%
REACTOME_ANTIGEN_PROCESSING_UBIQUITINATION_PROTEASOME_DEGRADATION	293	0.289442	1.00246	0.470667	0.676801	1	2505	tags=18%, list=16%, signal=21%
BIOCARTA_PTDINS_PATHWAY	23	0.418741	1.00229	0.43672	0.67609	1	49	tags=9%, list=0%, signal=9%
PID_ER_NONGENOMIC_PATHWAY	40	0.370275	1.00133	0.449557	0.677404	1	1509	tags=23%, list=9%, signal=25%
REACTOME_PHOSPHORYLATION_OF_THE_APC_C	19	0.430226	0.999127	0.453405	0.681828	1	3681	tags=26%, list=23%, signal=34%
BIOCARTA_INTRINSIC_PATHWAY	15	0.45066	0.997369	0.473783	0.685255	1	3496	tags=40%, list=22%, signal=51%
REACTOME_SIGNALING_BY_NOTCH	208	0.296581	0.997195	0.456825	0.684565	1	4029	tags=36%, list=25%, signal=47%
REACTOME_RESOLUTION_OF_ABASIC_SITES_AP_SITES	38	0.373644	0.994022	0.478559	0.691489	1	4133	tags=26%, list=26%, signal=35%
REACTOME_HIV_LIFE_CYCLE	147	0.307634	0.993926	0.459384	0.690584	1	4281	tags=30%, list=27%, signal=41%
KEGG_NEUROTROPHIN_SIGNALING_PATHWAY	119	0.311141	0.993214	0.462209	0.691305	1	1672	tags=17%, list=10%, signal=19%
REACTOME_TELOMERE_MAINTENANCE	69	0.340347	0.992086	0.470968	0.692984	1	4144	tags=29%, list=26%, signal=39%
NABA_CORE_MATRISOME	240	0.288436	0.991489	0.47749	0.69344	1	3874	tags=35%, list=24%, signal=46%
BIOCARTA_BAD_PATHWAY	23	0.405326	0.990825	0.461538	0.694048	1	471	tags=13%, list=3%, signal=13%
REACTOME_ACTIVATION_OF_MATRIX_METALLOPROTEINASES	21	0.415979	0.990166	0.481416	0.69466	1	3425	tags=48%, list=21%, signal=61%
KEGG_STEROID_BIOSYNTHESIS	16	0.444231	0.990152	0.467412	0.693544	1	698	tags=13%, list=4%, signal=13%
BIOCARTA_41BB_PATHWAY	15	0.453832	0.99013	0.47318	0.692458	1	2163	tags=33%, list=14%, signal=39%
PID_P38_MK2_PATHWAY	20	0.430141	0.988305	0.473958	0.695906	1	2424	tags=30%, list=15%, signal=35%
REACTOME_CHROMOSOME_MAINTENANCE	96	0.320753	0.986825	0.482602	0.69835	1	4330	tags=28%, list=27%, signal=38%
KEGG_FRUCTOSE_AND_MANNOSE_METABOLISM	32	0.3831	0.983103	0.491468	0.706611	1	1779	tags=16%, list=11%, signal=18%
KEGG_GLYCOSAMINOGLYCAN_BIOSYNTHESIS_CHONDROITIN_SULFATE	22	0.410121	0.983047	0.487676	0.705618	1	2862	tags=32%, list=18%, signal=39%
REACTOME_CELL_CYCLE_CHECKPOINTS	271	0.284352	0.982679	0.488372	0.705403	1	4424	tags=27%, list=28%, signal=36%
BIOCARTA_TGFB_PATHWAY	19	0.42087	0.982666	0.476723	0.704288	1	951	tags=16%, list=6%, signal=17%
REACTOME_SYNTHESIS_OF_VERY_LONG_CHAIN_FATTY_ACYL_COAS	21	0.416871	0.982611	0.483761	0.703271	1	1408	tags=14%, list=9%, signal=16%
REACTOME_EXTENSION_OF_TELOMERES	44	0.356798	0.981937	0.5	0.703777	1	4144	tags=32%, list=26%, signal=43%
REACTOME_TRIGLYCERIDE_METABOLISM	27	0.393647	0.980146	0.467227	0.707043	1	2249	tags=30%, list=14%, signal=34%
REACTOME_TP53_REGULATES_TRANSCRIPTION_OF_GENES_INVOLVED_IN_CYTOCHROME_C_RELEASE	20	0.421132	0.979357	0.499139	0.707811	1	2865	tags=30%, list=18%, signal=37%
REACTOME_DISEASES_OF_PROGRAMMED_CELL_DEATH	22	0.412408	0.978995	0.501812	0.707537	1	2279	tags=23%, list=14%, signal=26%
BIOCARTA_AKT_PATHWAY	20	0.418318	0.978483	0.473968	0.707759	1	1591	tags=20%, list=10%, signal=22%
REACTOME_SEPARATION_OF_SISTER_CHROMATIDS	180	0.292604	0.978255	0.518776	0.707167	1	4467	tags=31%, list=28%, signal=43%
PID_HES_HEY_PATHWAY	44	0.353118	0.97807	0.493913	0.706505	1	2399	tags=18%, list=15%, signal=21%
REACTOME_BETA_CATENIN_INDEPENDENT_WNT_SIGNALING	139	0.303728	0.977807	0.525074	0.706099	1	2539	tags=24%, list=16%, signal=29%
NABA_ECM_GLYCOPROTEINS	169	0.293291	0.977005	0.498567	0.706917	1	3776	tags=34%, list=24%, signal=44%
REACTOME_APOPTOTIC_EXECUTION_PHASE	45	0.349471	0.972353	0.495935	0.717607	1	2857	tags=27%, list=18%, signal=32%
REACTOME_MITOTIC_METAPHASE_AND_ANAPHASE	225	0.285415	0.969659	0.54212	0.723185	1	4467	tags=30%, list=28%, signal=41%
PID_AURORA_B_PATHWAY	39	0.362289	0.96523	0.502538	0.733218	1	1448	tags=10%, list=9%, signal=11%
REACTOME_SIGNALING_BY_HIPPO	20	0.415876	0.964173	0.523726	0.734694	1	3365	tags=25%, list=21%, signal=32%
BIOCARTA_CHEMICAL_PATHWAY	18	0.415963	0.962216	0.511797	0.738482	1	2865	tags=39%, list=18%, signal=47%
REACTOME_ACTIVATION_OF_ATR_IN_RESPONSE_TO_REPLICATION_STRESS	37	0.36454	0.9605	0.50764	0.741581	1	5199	tags=27%, list=33%, signal=40%
BIOCARTA_MET_PATHWAY	33	0.374207	0.955977	0.531034	0.751702	1	1222	tags=15%, list=8%, signal=16%
BIOCARTA_MCALPAIN_PATHWAY	16	0.429214	0.95228	0.529617	0.759769	1	2529	tags=38%, list=16%, signal=45%
REACTOME_ASSOCIATION_OF_TRIC_CCT_WITH_TARGET_PROTEINS_DURING_BIOSYNTHESIS	38	0.360107	0.952137	0.538044	0.758934	1	2466	tags=26%, list=15%, signal=31%
REACTOME_PRESYNAPTIC_FUNCTION_OF_KAINATE_RECEPTORS	18	0.409141	0.947731	0.549738	0.768949	1	1682	tags=33%, list=11%, signal=37%
PID_AJDISS_2PATHWAY	46	0.345	0.943575	0.548922	0.778391	1	2298	tags=20%, list=14%, signal=23%
REACTOME_EXTRA_NUCLEAR_ESTROGEN_SIGNALING	68	0.320537	0.943472	0.559486	0.777461	1	1911	tags=24%, list=12%, signal=27%
PID_P38_ALPHA_BETA_DOWNSTREAM_PATHWAY	38	0.351514	0.943351	0.559801	0.776545	1	2865	tags=29%, list=18%, signal=35%
REACTOME_MITOCHONDRIAL_PROTEIN_IMPORT	64	0.321483	0.941935	0.578773	0.778962	1	4045	tags=33%, list=25%, signal=44%
REACTOME_CARGO_RECOGNITION_FOR_CLATHRIN_MEDIATED_ENDOCYTOSIS	99	0.303352	0.941632	0.56994	0.778528	1	1671	tags=16%, list=10%, signal=18%
REACTOME_GLYCOGEN_METABOLISM	26	0.384677	0.939944	0.544674	0.781521	1	2006	tags=19%, list=13%, signal=22%
KEGG_SNARE_INTERACTIONS_IN_VESICULAR_TRANSPORT	37	0.353816	0.938733	0.548781	0.783398	1	2144	tags=27%, list=13%, signal=31%
REACTOME_GLUCOSE_METABOLISM	84	0.313828	0.936465	0.597484	0.78802	1	1248	tags=8%, list=8%, signal=9%
REACTOME_RAB_REGULATION_OF_TRAFFICKING	121	0.298442	0.93539	0.598802	0.789494	1	2325	tags=17%, list=15%, signal=19%
PID_ERBB1_DOWNSTREAM_PATHWAY	104	0.299085	0.930897	0.600601	0.799677	1	2987	tags=25%, list=19%, signal=31%
REACTOME_NEDDYLATION	223	0.273155	0.929836	0.658083	0.801204	1	3650	tags=30%, list=23%, signal=38%
REACTOME_RUNX2_REGULATES_BONE_DEVELOPMENT	28	0.37007	0.928929	0.581597	0.802261	1	2000	tags=21%, list=13%, signal=24%
REACTOME_HOMOLOGY_DIRECTED_REPAIR	121	0.291057	0.92655	0.617152	0.806974	1	4324	tags=26%, list=27%, signal=35%
REACTOME_ER_TO_GOLGI_ANTEROGRADE_TRANSPORT	144	0.286228	0.926377	0.636099	0.806149	1	2631	tags=25%, list=17%, signal=30%
REACTOME_TRNA_PROCESSING_IN_THE_NUCLEUS	58	0.322021	0.925613	0.605919	0.806854	1	4778	tags=38%, list=30%, signal=54%
KEGG_INSULIN_SIGNALING_PATHWAY	122	0.289225	0.925205	0.607784	0.806618	1	1599	tags=15%, list=10%, signal=16%
REACTOME_POST_TRANSLATIONAL_MODIFICATION_SYNTHESIS_OF_GPI_ANCHORED_PROTEINS	72	0.311275	0.925083	0.589786	0.805677	1	1813	tags=19%, list=11%, signal=22%
REACTOME_TRNA_AMINOACYLATION	42	0.344301	0.924647	0.582258	0.805573	1	4947	tags=40%, list=31%, signal=59%
KEGG_BLADDER_CANCER	41	0.338046	0.924305	0.594502	0.805159	1	2000	tags=17%, list=13%, signal=19%
REACTOME_RNA_POLYMERASE_II_TRANSCRIBES_SNRNA_GENES	74	0.308789	0.922876	0.620955	0.807438	1	4281	tags=31%, list=27%, signal=42%
REACTOME_APC_CDC20_MEDIATED_DEGRADATION_OF_NEK2A	25	0.377198	0.918593	0.5918	0.816952	1	3985	tags=32%, list=25%, signal=43%
PID_ARF6_DOWNSTREAM_PATHWAY	15	0.423548	0.918301	0.574275	0.816431	1	1744	tags=20%, list=11%, signal=22%
BIOCARTA_GCR_PATHWAY	17	0.406275	0.918237	0.561739	0.815362	1	775	tags=18%, list=5%, signal=19%
REACTOME_CELL_JUNCTION_ORGANIZATION	77	0.307721	0.913892	0.63355	0.825021	1	2298	tags=22%, list=14%, signal=26%
REACTOME_PROTEIN_LOCALIZATION	160	0.277139	0.912167	0.67894	0.828049	1	4054	tags=31%, list=25%, signal=41%
BIOCARTA_EPO_PATHWAY	18	0.39728	0.909692	0.602151	0.832995	1	1509	tags=17%, list=9%, signal=18%
BIOCARTA_CARDIACEGF_PATHWAY	17	0.403759	0.909483	0.577061	0.832252	1	2353	tags=29%, list=15%, signal=34%
PID_ECADHERIN_STABILIZATION_PATHWAY	40	0.341503	0.908144	0.587031	0.834379	1	2307	tags=28%, list=14%, signal=32%
REACTOME_MAP2K_AND_MAPK_ACTIVATION	37	0.33685	0.904565	0.640275	0.842219	1	1869	tags=24%, list=12%, signal=27%
REACTOME_INTRACELLULAR_SIGNALING_BY_SECOND_MESSENGERS	287	0.259162	0.903941	0.751979	0.84252	1	2360	tags=18%, list=15%, signal=20%
REACTOME_HS_GAG_DEGRADATION	22	0.381189	0.903088	0.603321	0.843377	1	3329	tags=45%, list=21%, signal=57%
PID_S1P_S1P1_PATHWAY	20	0.390039	0.902674	0.607207	0.843111	1	3294	tags=50%, list=21%, signal=63%
REACTOME_ACTIVATION_OF_THE_PRE_REPLICATIVE_COMPLEX	32	0.345359	0.900573	0.605128	0.847125	1	4069	tags=22%, list=26%, signal=29%
REACTOME_TP53_REGULATES_TRANSCRIPTION_OF_CELL_CYCLE_GENES	49	0.318122	0.898302	0.652597	0.851667	1	3891	tags=29%, list=24%, signal=38%
REACTOME_EPH_EPHRIN_SIGNALING	91	0.292806	0.895361	0.678899	0.857638	1	3144	tags=32%, list=20%, signal=39%
REACTOME_TRANSPORT_OF_BILE_SALTS_AND_ORGANIC_ACIDS_METAL_IONS_AND_AMINE_COMPOUNDS	61	0.307586	0.894212	0.697017	0.859197	1	2122	tags=25%, list=13%, signal=28%
REACTOME_VITAMIN_B5_PANTOTHENATE_METABOLISM	17	0.399349	0.893982	0.614286	0.858468	1	820	tags=18%, list=5%, signal=19%
REACTOME_PRE_NOTCH_PROCESSING_IN_GOLGI	18	0.392529	0.893926	0.623423	0.857317	1	2084	tags=28%, list=13%, signal=32%
PID_E2F_PATHWAY	71	0.297367	0.892628	0.664013	0.859279	1	2703	tags=15%, list=17%, signal=19%
REACTOME_ADP_SIGNALLING_THROUGH_P2Y_PURINOCEPTOR_12	18	0.392379	0.892593	0.628272	0.858095	1	1682	tags=33%, list=11%, signal=37%
REACTOME_STRIATED_MUSCLE_CONTRACTION	26	0.35687	0.892367	0.625216	0.857452	1	2181	tags=23%, list=14%, signal=27%
KEGG_PROSTATE_CANCER	85	0.291242	0.889859	0.679549	0.862258	1	3766	tags=28%, list=24%, signal=37%
REACTOME_NR1H3_NR1H2_REGULATE_GENE_EXPRESSION_LINKED_TO_CHOLESTEROL_TRANSPORT_AND_EFFLUX	34	0.336028	0.885515	0.641026	0.871666	1	2925	tags=24%, list=18%, signal=29%
REACTOME_TRANSPORT_OF_VITAMINS_NUCLEOSIDES_AND_RELATED_MOLECULES	35	0.341421	0.884763	0.62697	0.872201	1	3374	tags=29%, list=21%, signal=36%
REACTOME_G_BETA_GAMMA_SIGNALLING_THROUGH_CDC42	17	0.394777	0.884379	0.627949	0.871943	1	1682	tags=35%, list=11%, signal=39%
PID_ECADHERIN_NASCENT_AJ_PATHWAY	39	0.328289	0.884254	0.657095	0.870948	1	3227	tags=33%, list=20%, signal=42%
REACTOME_KERATAN_SULFATE_BIOSYNTHESIS	26	0.355724	0.880605	0.631103	0.878621	1	1197	tags=15%, list=8%, signal=17%
KEGG_MTOR_SIGNALING_PATHWAY	49	0.315548	0.879559	0.686084	0.879805	1	792	tags=8%, list=5%, signal=9%
BIOCARTA_ATM_PATHWAY	20	0.374408	0.878351	0.654762	0.881478	1	3532	tags=35%, list=22%, signal=45%
REACTOME_HSF1_ACTIVATION	28	0.349115	0.877752	0.670103	0.881598	1	2277	tags=21%, list=14%, signal=25%
REACTOME_SUMOYLATION_OF_DNA_DAMAGE_RESPONSE_AND_REPAIR_PROTEINS	77	0.292862	0.876608	0.704065	0.883016	1	4572	tags=27%, list=29%, signal=38%
REACTOME_BASE_EXCISION_REPAIR	70	0.295921	0.875711	0.719626	0.883846	1	4133	tags=26%, list=26%, signal=35%
REACTOME_YAP1_AND_WWTR1_TAZ_STIMULATED_GENE_EXPRESSION	15	0.398487	0.874715	0.669131	0.884934	1	2613	tags=27%, list=16%, signal=32%
REACTOME_CONVERSION_FROM_APC_C_CDC20_TO_APC_C_CDH1_IN_LATE_ANAPHASE	19	0.372206	0.874015	0.645503	0.885281	1	3681	tags=26%, list=23%, signal=34%
REACTOME_DOWNSTREAM_SIGNAL_TRANSDUCTION	28	0.34775	0.873899	0.664298	0.884294	1	3311	tags=29%, list=21%, signal=36%
REACTOME_SEMA4D_IN_SEMAPHORIN_SIGNALING	24	0.361522	0.872206	0.664865	0.887159	1	2552	tags=29%, list=16%, signal=35%
PID_HIF2PATHWAY	32	0.336091	0.866773	0.683566	0.898888	1	5382	tags=53%, list=34%, signal=80%
REACTOME_MRNA_SPLICING_MINOR_PATHWAY	52	0.309253	0.866595	0.718802	0.898	1	5170	tags=42%, list=32%, signal=62%
REACTOME_PROSTACYCLIN_SIGNALLING_THROUGH_PROSTACYCLIN_RECEPTOR	16	0.390434	0.863762	0.663653	0.903447	1	1682	tags=31%, list=11%, signal=35%
REACTOME_PEROXISOMAL_LIPID_METABOLISM	26	0.345441	0.860686	0.681592	0.909381	1	3481	tags=31%, list=22%, signal=39%
BIOCARTA_INTEGRIN_PATHWAY	32	0.327595	0.858764	0.687919	0.912547	1	2529	tags=31%, list=16%, signal=37%
REACTOME_VIRAL_MESSENGER_RNA_SYNTHESIS	44	0.315824	0.858113	0.698492	0.912853	1	5258	tags=39%, list=33%, signal=57%
REACTOME_TRNA_PROCESSING	108	0.272642	0.857734	0.769795	0.912359	1	4778	tags=34%, list=30%, signal=49%
REACTOME_DEPOSITION_OF_NEW_CENPA_CONTAINING_NUCLEOSOMES_AT_THE_CENTROMERE	53	0.303874	0.852341	0.745514	0.923572	1	5361	tags=36%, list=34%, signal=54%
KEGG_RETINOL_METABOLISM	24	0.353121	0.850226	0.698556	0.927265	1	514	tags=8%, list=3%, signal=9%
REACTOME_FORMATION_OF_TC_NER_PRE_INCISION_COMPLEX	53	0.303988	0.849364	0.728013	0.92789	1	4483	tags=40%, list=28%, signal=55%
PID_FGF_PATHWAY	49	0.30369	0.848005	0.757785	0.929575	1	1509	tags=14%, list=9%, signal=16%
REACTOME_SEMA4D_INDUCED_CELL_MIGRATION_AND_GROWTH_CONE_COLLAPSE	20	0.357608	0.846117	0.705263	0.932614	1	2552	tags=30%, list=16%, signal=36%
REACTOME_INTRINSIC_PATHWAY_FOR_APOPTOSIS	53	0.298311	0.845463	0.728188	0.932786	1	3157	tags=25%, list=20%, signal=30%
REACTOME_JNK_C_JUN_KINASES_PHOSPHORYLATION_AND_ACTIVATION_MEDIATED_BY_ACTIVATED_HUMAN_TAK1	21	0.354553	0.845054	0.680272	0.932331	1	2622	tags=29%, list=16%, signal=34%
BIOCARTA_PDGF_PATHWAY	28	0.331642	0.845046	0.715054	0.931039	1	1509	tags=18%, list=9%, signal=20%
REACTOME_RHO_GTPASES_ACTIVATE_CIT	19	0.358576	0.843427	0.704587	0.93339	1	2552	tags=37%, list=16%, signal=44%
REACTOME_FORMATION_OF_INCISION_COMPLEX_IN_GG_NER	43	0.311509	0.842388	0.733884	0.934512	1	4069	tags=35%, list=26%, signal=47%
REACTOME_SIGNALING_BY_TGF_BETA_FAMILY_MEMBERS	97	0.270903	0.83854	0.78905	0.941685	1	2948	tags=25%, list=18%, signal=30%
REACTOME_FORMATION_OF_ATP_BY_CHEMIOSMOTIC_COUPLING	18	0.370667	0.836932	0.698384	0.943955	1	4838	tags=56%, list=30%, signal=80%
REACTOME_PROTEIN_FOLDING	89	0.271673	0.835773	0.822504	0.945051	1	2053	tags=20%, list=13%, signal=23%
REACTOME_TP53_REGULATES_TRANSCRIPTION_OF_ADDITIONAL_CELL_CYCLE_GENES_WHOSE_EXACT_ROLE_IN_THE_P53_PATHWAY_REMAIN_UNCERTAIN	21	0.35822	0.83572	0.728669	0.943856	1	3791	tags=29%, list=24%, signal=37%
BIOCARTA_RACCYCD_PATHWAY	26	0.331447	0.83251	0.721088	0.949572	1	3443	tags=35%, list=22%, signal=44%
NABA_PROTEOGLYCANS	29	0.32663	0.832202	0.711434	0.94892	1	3874	tags=34%, list=24%, signal=45%
REACTOME_PROCESSING_OF_DNA_DOUBLE_STRAND_BREAK_ENDS	81	0.275493	0.831556	0.790064	0.949033	1	4324	tags=26%, list=27%, signal=35%
REACTOME_RA_BIOSYNTHESIS_PATHWAY	18	0.360971	0.830377	0.700525	0.950131	1	514	tags=11%, list=3%, signal=11%
REACTOME_TP53_REGULATES_TRANSCRIPTION_OF_DNA_REPAIR_GENES	61	0.284055	0.827408	0.782677	0.955158	1	5178	tags=38%, list=32%, signal=56%
REACTOME_GLUCONEOGENESIS	28	0.332116	0.827325	0.721311	0.954034	1	913	tags=11%, list=6%, signal=11%
REACTOME_AMINO_ACIDS_REGULATE_MTORC1	54	0.286452	0.825569	0.797407	0.956368	1	2713	tags=19%, list=17%, signal=22%
KEGG_NON_SMALL_CELL_LUNG_CANCER	54	0.289368	0.824216	0.797147	0.957952	1	792	tags=9%, list=5%, signal=10%
KEGG_DORSO_VENTRAL_AXIS_FORMATION	22	0.348075	0.822203	0.741768	0.960886	1	899	tags=9%, list=6%, signal=10%
KEGG_BASAL_TRANSCRIPTION_FACTORS	33	0.317702	0.821639	0.75	0.960766	1	3230	tags=27%, list=20%, signal=34%
REACTOME_HIV_TRANSCRIPTION_INITIATION	46	0.29506	0.821144	0.786753	0.960505	1	3328	tags=26%, list=21%, signal=33%
REACTOME_NRIF_SIGNALS_CELL_DEATH_FROM_THE_NUCLEUS	16	0.364754	0.820857	0.7375	0.959788	1	3985	tags=56%, list=25%, signal=75%
KEGG_SPHINGOLIPID_METABOLISM	36	0.306597	0.820305	0.768189	0.959543	1	2475	tags=28%, list=16%, signal=33%
KEGG_CYSTEINE_AND_METHIONINE_METABOLISM	26	0.330901	0.818475	0.727586	0.962106	1	2721	tags=19%, list=17%, signal=23%
BIOCARTA_MPR_PATHWAY	20	0.3502	0.818435	0.714022	0.960854	1	471	tags=10%, list=3%, signal=10%
REACTOME_AUTOPHAGY	142	0.251494	0.817547	0.898305	0.96142	1	4045	tags=35%, list=25%, signal=46%
BIOCARTA_P53_PATHWAY	16	0.364427	0.816392	0.729831	0.962525	1	3532	tags=38%, list=22%, signal=48%
PID_ERA_GENOMIC_PATHWAY	60	0.28407	0.814337	0.799373	0.965412	1	2300	tags=18%, list=14%, signal=21%
KEGG_UBIQUITIN_MEDIATED_PROTEOLYSIS	131	0.250933	0.81306	0.905547	0.966603	1	2269	tags=14%, list=14%, signal=16%
BIOCARTA_VEGF_PATHWAY	26	0.326904	0.811562	0.734007	0.968293	1	4024	tags=38%, list=25%, signal=51%
REACTOME_TIE2_SIGNALING	17	0.3638	0.809017	0.737037	0.971999	1	1916	tags=18%, list=12%, signal=20%
KEGG_PHENYLALANINE_METABOLISM	16	0.361713	0.806069	0.762082	0.976453	1	690	tags=13%, list=4%, signal=13%
PID_SYNDECAN_3_PATHWAY	15	0.357912	0.798569	0.758364	0.989656	1	3131	tags=27%, list=20%, signal=33%
REACTOME_SUMOYLATION_OF_UBIQUITINYLATION_PROTEINS	39	0.298191	0.797885	0.816529	0.989598	1	1142	tags=5%, list=7%, signal=6%
REACTOME_CRISTAE_FORMATION	31	0.308277	0.797342	0.779541	0.989259	1	4962	tags=55%, list=31%, signal=79%
KEGG_TYROSINE_METABOLISM	31	0.30437	0.795028	0.799308	0.992253	1	1079	tags=10%, list=7%, signal=10%
REACTOME_O_LINKED_GLYCOSYLATION_OF_MUCINS	47	0.286896	0.794291	0.809061	0.992308	1	3444	tags=32%, list=22%, signal=41%
REACTOME_INTRA_GOLGI_TRAFFIC	43	0.294411	0.792752	0.821488	0.993709	1	2725	tags=19%, list=17%, signal=22%
REACTOME_ANCHORING_FIBRIL_FORMATION	15	0.359964	0.791867	0.758621	0.993947	1	3804	tags=53%, list=24%, signal=70%
REACTOME_BMAL1_CLOCK_NPAS2_ACTIVATES_CIRCADIAN_GENE_EXPRESSION	25	0.313165	0.787848	0.780316	0.999901	1	1989	tags=16%, list=12%, signal=18%
REACTOME_INHIBITION_OF_THE_PROTEOLYTIC_ACTIVITY_OF_APC_C_REQUIRED_FOR_THE_ONSET_OF_ANAPHASE_BY_MITOTIC_SPINDLE_CHECKPOINT_COMPONENTS	20	0.338799	0.7857	0.776801	1	1	3681	tags=25%, list=23%, signal=32%
PID_HNF3B_PATHWAY	31	0.306539	0.783633	0.820106	1	1	1106	tags=13%, list=7%, signal=14%
REACTOME_RHO_GTPASES_ACTIVATE_IQGAPS	25	0.32077	0.782794	0.818505	1	1	2298	tags=28%, list=14%, signal=33%
PID_MYC_ACTIV_PATHWAY	77	0.258581	0.781776	0.88974	1	1	4350	tags=34%, list=27%, signal=46%
NABA_COLLAGENS	42	0.287717	0.781502	0.839607	1	1	2986	tags=36%, list=19%, signal=44%
KEGG_ENDOMETRIAL_CANCER	52	0.28213	0.781438	0.855118	1	1	2539	tags=19%, list=16%, signal=23%
REACTOME_RESPIRATORY_ELECTRON_TRANSPORT_ATP_SYNTHESIS_BY_CHEMIOSMOTIC_COUPLING_AND_HEAT_PRODUCTION_BY_UNCOUPLING_PROTEINS	121	0.244608	0.778874	0.931387	1	1	4130	tags=36%, list=26%, signal=48%
PID_MAPK_TRK_PATHWAY	33	0.300473	0.775758	0.847458	1	1	2163	tags=21%, list=14%, signal=24%
REACTOME_COLLAGEN_CHAIN_TRIMERIZATION	42	0.287717	0.772408	0.862609	1	1	2986	tags=36%, list=19%, signal=44%
REACTOME_PINK_PARKIN_MEDIATED_MITOPHAGY	22	0.316092	0.770796	0.823834	1	1	4045	tags=50%, list=25%, signal=67%
REACTOME_ESTROGEN_DEPENDENT_NUCLEAR_EVENTS_DOWNSTREAM_OF_ESR_MEMBRANE_SIGNALING	22	0.320484	0.767481	0.816151	1	1	1545	tags=14%, list=10%, signal=15%
REACTOME_SIGNALLING_TO_RAS	20	0.330915	0.766836	0.824156	1	1	2866	tags=35%, list=18%, signal=43%
REACTOME_NUCLEAR_PORE_COMPLEX_NPC_DISASSEMBLY	36	0.284635	0.766107	0.856176	1	1	5258	tags=31%, list=33%, signal=45%
REACTOME_N_GLYCAN_ANTENNAE_ELONGATION_IN_THE_MEDIAL_TRANS_GOLGI	23	0.32081	0.765658	0.838998	1	1	1749	tags=22%, list=11%, signal=24%
REACTOME_ENERGY_DEPENDENT_REGULATION_OF_MTOR_BY_LKB1_AMPK	28	0.300249	0.765645	0.814503	1	1	3838	tags=43%, list=24%, signal=56%
REACTOME_SIGNALING_BY_EGFR	48	0.273821	0.761669	0.877888	1	1	1689	tags=17%, list=11%, signal=19%
REACTOME_MITOTIC_G2_G2_M_PHASES	191	0.228942	0.76121	0.982857	1	1	3650	tags=23%, list=23%, signal=30%
REACTOME_FANCONI_ANEMIA_PATHWAY	39	0.286079	0.761154	0.867241	1	1	5540	tags=41%, list=35%, signal=63%
KEGG_REGULATION_OF_AUTOPHAGY	19	0.329457	0.760018	0.819444	1	1	1439	tags=21%, list=9%, signal=23%
REACTOME_METABOLISM_OF_COFACTORS	19	0.322022	0.757207	0.807339	1	1	1119	tags=16%, list=7%, signal=17%
PID_HDAC_CLASSI_PATHWAY	63	0.262059	0.756988	0.882353	1	1	1600	tags=11%, list=10%, signal=12%
REACTOME_SIALIC_ACID_METABOLISM	32	0.295286	0.755924	0.845878	1	1	2722	tags=22%, list=17%, signal=26%
REACTOME_METALLOPROTEASE_DUBS	27	0.30353	0.755718	0.8375	1	1	4230	tags=37%, list=27%, signal=50%
BIOCARTA_GSK3_PATHWAY	19	0.325704	0.755362	0.83871	1	1	3118	tags=37%, list=20%, signal=46%
PID_RXR_VDR_PATHWAY	24	0.305574	0.754458	0.843462	1	1	1014	tags=13%, list=6%, signal=13%
REACTOME_HIV_TRANSCRIPTION_ELONGATION	42	0.27913	0.75332	0.880065	1	1	5178	tags=40%, list=32%, signal=60%
REACTOME_RNA_POLYMERASE_I_TRANSCRIPTION_TERMINATION	31	0.291683	0.749807	0.845486	1	1	4399	tags=32%, list=28%, signal=44%
KEGG_THYROID_CANCER	29	0.299853	0.748247	0.857143	1	1	2865	tags=28%, list=18%, signal=34%
PID_ATF2_PATHWAY	54	0.263972	0.747677	0.926421	1	1	2737	tags=26%, list=17%, signal=31%
REACTOME_TCF_DEPENDENT_SIGNALING_IN_RESPONSE_TO_WNT	196	0.222632	0.746073	0.987772	1	1	3670	tags=24%, list=23%, signal=31%
REACTOME_MAP3K8_TPL2_DEPENDENT_MAPK1_3_ACTIVATION	16	0.33843	0.743499	0.810036	1	1	2065	tags=25%, list=13%, signal=29%
BIOCARTA_G1_PATHWAY	28	0.295279	0.74042	0.882979	1	1	3891	tags=25%, list=24%, signal=33%
PID_HEDGEHOG_2PATHWAY	21	0.313449	0.740047	0.83779	1	1	449	tags=5%, list=3%, signal=5%
REACTOME_RESOLUTION_OF_D_LOOP_STRUCTURES	34	0.288171	0.739966	0.869565	1	1	3214	tags=15%, list=20%, signal=18%
REACTOME_EPHA_MEDIATED_GROWTH_CONE_COLLAPSE	28	0.291826	0.739221	0.839931	1	1	1154	tags=14%, list=7%, signal=15%
REACTOME_ER_QUALITY_CONTROL_COMPARTMENT_ERQC	21	0.310167	0.736976	0.833935	1	1	1294	tags=14%, list=8%, signal=16%
KEGG_OXIDATIVE_PHOSPHORYLATION	121	0.232219	0.735056	0.969208	1	1	4130	tags=36%, list=26%, signal=48%
REACTOME_EGFR_DOWNREGULATION	29	0.283837	0.734669	0.883761	1	1	1555	tags=17%, list=10%, signal=19%
REACTOME_INTRAFLAGELLAR_TRANSPORT	52	0.260127	0.734284	0.907496	1	1	3100	tags=25%, list=19%, signal=31%
REACTOME_HIV_ELONGATION_ARREST_AND_RECOVERY	32	0.283482	0.734116	0.875217	1	1	4281	tags=34%, list=27%, signal=47%
REACTOME_BUDDING_AND_MATURATION_OF_HIV_VIRION	28	0.290466	0.733434	0.893885	1	1	4231	tags=46%, list=27%, signal=63%
KEGG_RENAL_CELL_CARCINOMA	69	0.247598	0.727663	0.948438	1	1	871	tags=7%, list=5%, signal=8%
REACTOME_FGFR1_MUTANT_RECEPTOR_ACTIVATION	26	0.295754	0.727056	0.883275	1	1	1226	tags=15%, list=8%, signal=17%
REACTOME_AMINO_ACID_TRANSPORT_ACROSS_THE_PLASMA_MEMBRANE	28	0.292625	0.726388	0.889474	1	1	23	tags=4%, list=0%, signal=4%
REACTOME_GLYCOLYSIS	68	0.243301	0.725334	0.975884	1	1	1248	tags=6%, list=8%, signal=6%
REACTOME_HEPARAN_SULFATE_HEPARIN_HS_GAG_METABOLISM	53	0.256683	0.724256	0.932343	1	1	3329	tags=30%, list=21%, signal=38%
REACTOME_NUCLEAR_IMPORT_OF_REV_PROTEIN	34	0.277522	0.723974	0.900515	1	1	5258	tags=35%, list=33%, signal=53%
REACTOME_MITOCHONDRIAL_FATTY_ACID_BETA_OXIDATION	35	0.278465	0.723966	0.875	1	1	5895	tags=57%, list=37%, signal=90%
REACTOME_MITOCHONDRIAL_TRNA_AMINOACYLATION	21	0.307389	0.722744	0.885017	1	1	4947	tags=52%, list=31%, signal=76%
REACTOME_NS1_MEDIATED_EFFECTS_ON_HOST_PATHWAYS	40	0.268279	0.721886	0.933116	1	1	4730	tags=30%, list=30%, signal=43%
REACTOME_CELLULAR_SENESCENCE	160	0.219214	0.719049	0.992928	1	1	3987	tags=27%, list=25%, signal=35%
REACTOME_BASE_EXCISION_REPAIR_AP_SITE_FORMATION	42	0.263043	0.717324	0.916376	1	1	5361	tags=40%, list=34%, signal=61%
SA_PTEN_PATHWAY	17	0.317719	0.715626	0.868321	1	1	1509	tags=18%, list=9%, signal=19%
REACTOME_PHASE_I_FUNCTIONALIZATION_OF_COMPOUNDS	70	0.240777	0.713838	0.965517	1	1	2926	tags=20%, list=18%, signal=24%
REACTOME_DEADENYLATION_DEPENDENT_MRNA_DECAY	56	0.247573	0.713001	0.942339	1	1	5066	tags=36%, list=32%, signal=52%
REACTOME_RESPIRATORY_ELECTRON_TRANSPORT	99	0.228669	0.711934	0.972435	1	1	4780	tags=41%, list=30%, signal=59%
REACTOME_SIGNAL_TRANSDUCTION_BY_L1	21	0.299802	0.710018	0.888689	1	1	1721	tags=19%, list=11%, signal=21%
REACTOME_SIGNALLING_TO_ERKS	34	0.269356	0.708732	0.912371	1	1	2866	tags=29%, list=18%, signal=36%
REACTOME_METABOLISM_OF_FAT_SOLUBLE_VITAMINS	38	0.268804	0.70836	0.925734	1	1	3980	tags=29%, list=25%, signal=38%
REACTOME_ASSEMBLY_OF_THE_HIV_VIRION	16	0.312717	0.706358	0.889892	1	1	3985	tags=50%, list=25%, signal=67%
REACTOME_ABORTIVE_ELONGATION_OF_HIV_1_TRANSCRIPT_IN_THE_ABSENCE_OF_TAT	23	0.293891	0.705933	0.885397	1	1	4281	tags=35%, list=27%, signal=47%
REACTOME_TRANSCRIPTION_OF_THE_HIV_GENOME	68	0.238122	0.699332	0.975329	1	1	4281	tags=29%, list=27%, signal=40%
REACTOME_REGULATION_OF_GLUCOKINASE_BY_GLUCOKINASE_REGULATORY_PROTEIN	32	0.272703	0.697077	0.913851	1	1	5258	tags=34%, list=33%, signal=51%
REACTOME_FORMATION_OF_THE_EARLY_ELONGATION_COMPLEX	33	0.266679	0.694531	0.936027	1	1	4281	tags=30%, list=27%, signal=41%
BIOCARTA_ALK_PATHWAY	32	0.268752	0.691761	0.917241	1	1	951	tags=9%, list=6%, signal=10%
REACTOME_SIGNALING_BY_ERBB2_IN_CANCER	25	0.282425	0.690492	0.928196	1	1	1545	tags=16%, list=10%, signal=18%
KEGG_ETHER_LIPID_METABOLISM	24	0.280278	0.687076	0.907104	1	1	2793	tags=29%, list=18%, signal=35%
REACTOME_RESOLUTION_OF_D_LOOP_STRUCTURES_THROUGH_SYNTHESIS_DEPENDENT_STRAND_ANNEALING_SDSA	26	0.275349	0.680332	0.924825	1	1	11560	tags=100%, list=73%, signal=363%
REACTOME_SIGNALING_BY_FGFR2_IIIA_TM	19	0.291659	0.678074	0.936685	1	1	4281	tags=32%, list=27%, signal=43%
REACTOME_EXPORT_OF_VIRAL_RIBONUCLEOPROTEINS_FROM_NUCLEUS	33	0.25844	0.676546	0.942509	1	1	5258	tags=33%, list=33%, signal=50%
KEGG_AMINOACYL_TRNA_BIOSYNTHESIS	41	0.249866	0.676514	0.94599	1	1	4947	tags=39%, list=31%, signal=56%
PID_FANCONI_PATHWAY	46	0.242223	0.673583	0.967128	1	1	4123	tags=15%, list=26%, signal=20%
REACTOME_FORMATION_OF_RNA_POL_II_ELONGATION_COMPLEX	57	0.236975	0.673241	0.970636	1	1	4281	tags=28%, list=27%, signal=38%
REACTOME_CONSTITUTIVE_SIGNALING_BY_EGFRVIII	15	0.304924	0.671147	0.89924	1	1	1545	tags=13%, list=10%, signal=15%
REACTOME_CONSTITUTIVE_SIGNALING_BY_LIGAND_RESPONSIVE_EGFR_CANCER_VARIANTS	19	0.291526	0.668322	0.937956	1	1	4003	tags=32%, list=25%, signal=42%
REACTOME_ATTENUATION_PHASE	25	0.269425	0.667588	0.934944	1	1	2277	tags=20%, list=14%, signal=23%
REACTOME_DISEASES_ASSOCIATED_WITH_O_GLYCOSYLATION_OF_PROTEINS	57	0.233083	0.667228	0.972881	1	1	3858	tags=28%, list=24%, signal=37%
KEGG_HUNTINGTONS_DISEASE	168	0.203627	0.665677	1	1	1	4062	tags=30%, list=25%, signal=40%
KEGG_GLYCINE_SERINE_AND_THREONINE_METABOLISM	28	0.266209	0.663964	0.949301	1	1	2856	tags=14%, list=18%, signal=17%
REACTOME_CYCLIN_D_ASSOCIATED_EVENTS_IN_G1	44	0.240356	0.66192	0.973154	1	1	15	tags=2%, list=0%, signal=2%
REACTOME_TP53_REGULATES_METABOLIC_GENES	83	0.218165	0.659451	0.986527	1	1	3910	tags=34%, list=25%, signal=44%
REACTOME_GASTRIN_CREB_SIGNALLING_PATHWAY_VIA_PKC_AND_MAPK	16	0.300532	0.65778	0.921288	1	1	1499	tags=13%, list=9%, signal=14%
KEGG_O_GLYCAN_BIOSYNTHESIS	28	0.256861	0.652841	0.960884	1	1	1943	tags=18%, list=12%, signal=20%
REACTOME_SIGNALING_BY_ERBB2_ECD_MUTANTS	16	0.288623	0.652545	0.925319	1	1	1545	tags=13%, list=10%, signal=14%
REACTOME_TRANSPORT_OF_THE_SLBP_DEPENDANT_MATURE_MRNA	36	0.24499	0.652335	0.973154	1	1	5351	tags=33%, list=34%, signal=50%
REACTOME_MTOR_SIGNALLING	39	0.248219	0.650965	0.969748	1	1	3838	tags=31%, list=24%, signal=40%
REACTOME_THE_CITRIC_ACID_TCA_CYCLE_AND_RESPIRATORY_ELECTRON_TRANSPORT	167	0.19694	0.650694	1	1	1	4062	tags=31%, list=25%, signal=41%
REACTOME_O_LINKED_GLYCOSYLATION	93	0.212424	0.649583	0.995468	1	1	2722	tags=19%, list=17%, signal=23%
REACTOME_MRNA_CAPPING	29	0.253118	0.645416	0.956522	1	1	4281	tags=28%, list=27%, signal=38%
REACTOME_MICRORNA_MIRNA_BIOGENESIS	24	0.269284	0.643743	0.970639	1	1	4315	tags=42%, list=27%, signal=57%
REACTOME_REGULATION_OF_TP53_ACTIVITY_THROUGH_PHOSPHORYLATION	90	0.20867	0.643722	0.989474	1	1	4069	tags=24%, list=26%, signal=33%
REACTOME_NEGATIVE_REGULATION_OF_MET_ACTIVITY	21	0.269771	0.640361	0.956443	1	1	341	tags=5%, list=2%, signal=5%
REACTOME_TRANSCRIPTIONAL_ACTIVITY_OF_SMAD2_SMAD3_SMAD4_HETEROTRIMER	43	0.229537	0.638311	0.970248	1	1	3985	tags=26%, list=25%, signal=34%
REACTOME_RHO_GTPASES_ACTIVATE_PKNS	64	0.217117	0.638044	0.981013	1	1	3299	tags=22%, list=21%, signal=27%
REACTOME_MRNA_DECAY_BY_5_TO_3_EXORIBONUCLEASE	15	0.287529	0.630967	0.921389	1	1	4276	tags=47%, list=27%, signal=64%
REACTOME_SUMOYLATION	176	0.188441	0.630567	1	1	1	1432	tags=6%, list=9%, signal=6%
REACTOME_RESPONSE_OF_MTB_TO_PHAGOCYTOSIS	22	0.256858	0.628589	0.969479	1	1	4237	tags=32%, list=27%, signal=43%
REACTOME_POSTMITOTIC_NUCLEAR_PORE_COMPLEX_NPC_REFORMATION	27	0.249447	0.627012	0.960133	1	1	4572	tags=33%, list=29%, signal=47%
REACTOME_MITOPHAGY	29	0.246462	0.625753	0.973899	1	1	4045	tags=45%, list=25%, signal=60%
PID_ATR_PATHWAY	38	0.233265	0.62251	0.972222	1	1	4069	tags=21%, list=26%, signal=28%
PID_WNT_SIGNALING_PATHWAY	25	0.252479	0.621368	0.955357	1	1	3290	tags=28%, list=21%, signal=35%
REACTOME_TRANSPORT_OF_MATURE_MRNAS_DERIVED_FROM_INTRONLESS_TRANSCRIPTS	43	0.225819	0.609842	0.995122	1	1	5351	tags=33%, list=34%, signal=49%
REACTOME_COOPERATION_OF_PREFOLDIN_AND_TRIC_CCT_IN_ACTIN_AND_TUBULIN_FOLDING	28	0.240152	0.60372	0.981293	1	1	2691	tags=21%, list=17%, signal=26%
REACTOME_TRANSCRIPTIONAL_REGULATION_BY_SMALL_RNAS	79	0.196468	0.5999	1	1	1	5258	tags=37%, list=33%, signal=54%
PID_AR_PATHWAY	59	0.210417	0.59882	0.995008	1	1	3660	tags=22%, list=23%, signal=28%
BIOCARTA_PPARA_PATHWAY	47	0.216227	0.596824	0.998319	1	1	3118	tags=21%, list=20%, signal=26%
REACTOME_DEFECTIVE_B4GALT7_CAUSES_EDS_PROGEROID_TYPE	20	0.252553	0.592592	0.966973	1	1	3980	tags=40%, list=25%, signal=53%
PID_INSULIN_PATHWAY	43	0.217239	0.590932	0.995025	1	1	1843	tags=9%, list=12%, signal=10%
REACTOME_O_GLYCOSYLATION_OF_TSR_DOMAIN_CONTAINING_PROTEINS	37	0.223668	0.586817	0.984127	1	1	2720	tags=19%, list=17%, signal=23%
REACTOME_DNA_DOUBLE_STRAND_BREAK_REPAIR	149	0.179541	0.579036	1	1	1	4338	tags=23%, list=27%, signal=32%
REACTOME_FOXO_MEDIATED_TRANSCRIPTION_OF_OXIDATIVE_STRESS_METABOLIC_AND_NEURONAL_GENES	25	0.238849	0.578297	0.99278	1	1	2759	tags=16%, list=17%, signal=19%
REACTOME_NEGATIVE_EPIGENETIC_REGULATION_OF_RRNA_EXPRESSION	81	0.192326	0.576062	0.998501	1	1	4399	tags=25%, list=28%, signal=34%
REACTOME_HCMV_INFECTION	121	0.182081	0.575125	1	1	1	4453	tags=27%, list=28%, signal=38%
REACTOME_HCMV_LATE_EVENTS	82	0.188931	0.573608	1	1	1	5258	tags=37%, list=33%, signal=54%
REACTOME_ENDOSOMAL_SORTING_COMPLEX_REQUIRED_FOR_TRANSPORT_ESCRT	31	0.222995	0.56898	0.989967	1	1	4231	tags=42%, list=27%, signal=57%
REACTOME_TRANSPORT_OF_MATURE_TRANSCRIPT_TO_CYTOPLASM	81	0.186161	0.564447	0.996769	1	1	5351	tags=32%, list=34%, signal=48%
REACTOME_G2_M_DNA_DAMAGE_CHECKPOINT	78	0.187225	0.562259	1	1	1	4324	tags=23%, list=27%, signal=32%
REACTOME_MYOGENESIS	25	0.229689	0.557946	0.982206	1	1	2380	tags=20%, list=15%, signal=23%
REACTOME_SPHINGOLIPID_DE_NOVO_BIOSYNTHESIS	41	0.207163	0.557633	0.993443	1	1	2723	tags=17%, list=17%, signal=21%
REACTOME_SYNTHESIS_OF_PC	26	0.223553	0.556596	0.989492	1	1	4364	tags=31%, list=27%, signal=42%
REACTOME_PROCESSING_OF_CAPPED_INTRON_CONTAINING_PRE_MRNA	239	0.162892	0.553432	1	1	1	4917	tags=28%, list=31%, signal=41%
REACTOME_REGULATION_OF_TP53_EXPRESSION_AND_DEGRADATION	37	0.207369	0.552728	0.99308	1	1	3985	tags=27%, list=25%, signal=36%
REACTOME_DNA_DAMAGE_TELOMERE_STRESS_INDUCED_SENESCENCE	55	0.195182	0.551463	1	1	1	3987	tags=25%, list=25%, signal=34%
KEGG_RNA_DEGRADATION	56	0.191297	0.544509	0.996845	1	1	5965	tags=46%, list=37%, signal=74%
BIOCARTA_EIF_PATHWAY	16	0.240671	0.536428	0.981719	1	1	3478	tags=31%, list=22%, signal=40%
KEGG_RNA_POLYMERASE	29	0.208294	0.52366	0.998246	1	1	5072	tags=41%, list=32%, signal=61%
REACTOME_ACTIVATION_OF_ANTERIOR_HOX_GENES_IN_HINDBRAIN_DEVELOPMENT_DURING_EARLY_EMBRYOGENESIS	93	0.168346	0.522509	1	1	1	3328	tags=14%, list=21%, signal=18%
REACTOME_SUMOYLATION_OF_SUMOYLATION_PROTEINS	35	0.198629	0.514628	1	1	1	5258	tags=31%, list=33%, signal=47%
REACTOME_RECOGNITION_AND_ASSOCIATION_OF_DNA_GLYCOSYLASE_WITH_SITE_CONTAINING_AN_AFFECTED_PURINE	35	0.194607	0.514286	0.99661	1	1	3852	tags=23%, list=24%, signal=30%
KEGG_FATTY_ACID_METABOLISM	35	0.196497	0.51358	1	1	1	4724	tags=34%, list=30%, signal=49%
REACTOME_NUCLEAR_ENVELOPE_BREAKDOWN	53	0.178771	0.508471	1	1	1	2874	tags=13%, list=18%, signal=16%
REACTOME_REGULATION_OF_HSF1_MEDIATED_HEAT_SHOCK_RESPONSE	79	0.168219	0.507691	1	1	1	2260	tags=10%, list=14%, signal=12%
REACTOME_MEIOTIC_RECOMBINATION	55	0.175865	0.504569	0.998392	1	1	4324	tags=24%, list=27%, signal=32%
REACTOME_RNA_POLYMERASE_I_PROMOTER_ESCAPE	63	0.169676	0.502346	1	1	1	4399	tags=27%, list=28%, signal=37%
REACTOME_B_WICH_COMPLEX_POSITIVELY_REGULATES_RRNA_EXPRESSION	63	0.171997	0.494431	1	1	1	4399	tags=25%, list=28%, signal=35%
KEGG_SPLICEOSOME	126	0.151704	0.480607	1	1	1	4082	tags=22%, list=26%, signal=30%
REACTOME_INTERACTIONS_OF_REV_WITH_HOST_CELLULAR_PROTEINS	37	0.175061	0.464599	1	1	1	5258	tags=32%, list=33%, signal=48%
REACTOME_CITRIC_ACID_CYCLE_TCA_CYCLE	22	0.190923	0.459968	0.996296	1	1	3854	tags=23%, list=24%, signal=30%
REACTOME_FGFR2_ALTERNATIVE_SPLICING	25	0.178984	0.439783	1	1	1	4603	tags=32%, list=29%, signal=45%
REACTOME_MRNA_SPLICING	188	0.130533	0.432874	1	1	1	4917	tags=28%, list=31%, signal=40%
REACTOME_TRISTETRAPROLIN_TTP_ZFP36_BINDS_AND_DESTABILIZES_MRNA	17	0.187725	0.428101	0.99637	1	1	2987	tags=12%, list=19%, signal=14%
PID_DNA_PK_PATHWAY	15	0.19386	0.424983	0.998092	1	1	12855	tags=100%, list=81%, signal=516%
REACTOME_INTERACTIONS_OF_VPR_WITH_HOST_CELLULAR_PROTEINS	37	0.16108	0.424619	1	1	1	5258	tags=32%, list=33%, signal=48%
REACTOME_G0_AND_EARLY_G1	27	0.1614	0.410192	1	1	1	13374	tags=100%, list=84%, signal=619%
REACTOME_G1_S_SPECIFIC_TRANSCRIPTION	29	0.16142	0.410134	1	1	1	13374	tags=100%, list=84%, signal=619%
REACTOME_TRANSCRIPTION_OF_E2F_TARGETS_UNDER_NEGATIVE_CONTROL_BY_DREAM_COMPLEX	19	0.161319	0.37865	1	1	1	13374	tags=100%, list=84%, signal=620%
KEGG_SELENOAMINO_ACID_METABOLISM	24	0.146016	0.352383	1	1	1	3848	tags=21%, list=24%, signal=27%
REACTOME_TRANSCRIPTION_OF_E2F_TARGETS_UNDER_NEGATIVE_CONTROL_BY_P107_RBL1_AND_P130_RBL2_IN_COMPLEX_WITH_HDAC1	16	0.161288	0.351355	1	0.999962	1	13374	tags=100%, list=84%, signal=620%

## Sheet: GSEA enrichment in CL2
NAME	SIZE	ES	NES	NOM p-val	FDR q-val	FWER p-val	RANK AT MAX	LEADING EDGE
REACTOME_TRANSMISSION_ACROSS_CHEMICAL_SYNAPSES	234	-0.677441	-2.51927	0	0	0	1784	tags=50%, list=11%, signal=55%
REACTOME_PROTEIN_PROTEIN_INTERACTIONS_AT_SYNAPSES	84	-0.758314	-2.48483	0	0	0	1770	tags=54%, list=11%, signal=60%
REACTOME_NEUREXINS_AND_NEUROLIGINS	55	-0.785993	-2.41708	0	0	0	1770	tags=60%, list=11%, signal=67%
REACTOME_NEUROTRANSMITTER_RELEASE_CYCLE	45	-0.792621	-2.30757	0	0	0	1784	tags=69%, list=11%, signal=77%
REACTOME_GLUTAMATE_NEUROTRANSMITTER_RELEASE_CYCLE	24	-0.874526	-2.2824	0	0	0	1383	tags=79%, list=9%, signal=87%
REACTOME_NEUROTRANSMITTER_RECEPTORS_AND_POSTSYNAPTIC_SIGNAL_TRANSMISSION	178	-0.629398	-2.27959	0	0	0	1753	tags=44%, list=11%, signal=49%
REACTOME_DOPAMINE_NEUROTRANSMITTER_RELEASE_CYCLE	22	-0.878235	-2.23386	0	0	0	1130	tags=73%, list=7%, signal=78%
REACTOME_ACTIVATION_OF_NMDA_RECEPTORS_AND_POSTSYNAPTIC_EVENTS	84	-0.680332	-2.22403	0	0	0	1753	tags=44%, list=11%, signal=49%
REACTOME_PHASE_0_RAPID_DEPOLARISATION	41	-0.749792	-2.18329	0	0	0	2409	tags=66%, list=15%, signal=77%
REACTOME_ASSEMBLY_AND_CELL_SURFACE_PRESENTATION_OF_NMDA_RECEPTORS	36	-0.752083	-2.16615	0	0	0	1753	tags=56%, list=11%, signal=62%
REACTOME_LONG_TERM_POTENTIATION	23	-0.846786	-2.16561	0	0	0	1753	tags=74%, list=11%, signal=83%
REACTOME_SEROTONIN_NEUROTRANSMITTER_RELEASE_CYCLE	17	-0.919765	-2.16097	0	0	0	1130	tags=88%, list=7%, signal=95%
REACTOME_TRAFFICKING_OF_AMPA_RECEPTORS	31	-0.773943	-2.13228	0	0	0	1379	tags=55%, list=9%, signal=60%
REACTOME_VOLTAGE_GATED_POTASSIUM_CHANNELS	36	-0.74325	-2.11742	0	6.68075e-05	0.001	2134	tags=69%, list=13%, signal=80%
REACTOME_NEGATIVE_REGULATION_OF_NMDA_RECEPTOR_MEDIATED_NEURONAL_TRANSMISSION	21	-0.84865	-2.10936	0	6.23537e-05	0.001	1753	tags=76%, list=11%, signal=85%
REACTOME_DAG_AND_IP3_SIGNALING	40	-0.742249	-2.10518	0	5.84566e-05	0.001	1201	tags=40%, list=8%, signal=43%
REACTOME_NOREPINEPHRINE_NEUROTRANSMITTER_RELEASE_CYCLE	15	-0.910455	-2.08978	0	0.000106248	0.002	1130	tags=80%, list=7%, signal=86%
REACTOME_INTERACTION_BETWEEN_L1_AND_ANKYRINS	29	-0.754195	-2.07587	0	0.000100345	0.002	2697	tags=69%, list=17%, signal=83%
REACTOME_UNBLOCKING_OF_NMDA_RECEPTORS_GLUTAMATE_BINDING_AND_ACTIVATION	21	-0.830195	-2.07091	0	9.50641e-05	0.002	1753	tags=71%, list=11%, signal=80%
REACTOME_GABA_SYNTHESIS_RELEASE_REUPTAKE_AND_DEGRADATION	19	-0.835378	-2.04483	0	0.000222743	0.005	2549	tags=95%, list=16%, signal=113%
REACTOME_G_PROTEIN_MEDIATED_EVENTS	50	-0.6715	-2.0409	0	0.000255011	0.006	1587	tags=44%, list=10%, signal=49%
BIOCARTA_NOS1_PATHWAY	20	-0.810166	-2.03723	0	0.000243419	0.006	1963	tags=70%, list=12%, signal=80%
REACTOME_RAS_ACTIVATION_UPON_CA2_INFLUX_THROUGH_NMDA_RECEPTOR	20	-0.835459	-2.0208	0	0.000310594	0.008	1753	tags=70%, list=11%, signal=79%
REACTOME_CA_DEPENDENT_EVENTS	36	-0.710816	-2.00948	0	0.000297653	0.008	1587	tags=42%, list=10%, signal=46%
REACTOME_CARDIAC_CONDUCTION	132	-0.570417	-1.9885	0	0.000575962	0.016	2468	tags=42%, list=15%, signal=49%
REACTOME_RECEPTOR_TYPE_TYROSINE_PROTEIN_PHOSPHATASES	18	-0.810282	-1.98579	0	0.00055381	0.016	2671	tags=67%, list=17%, signal=80%
REACTOME_TRANSCRIPTIONAL_REGULATION_BY_MECP2	58	-0.64299	-1.97538	0	0.000565666	0.016	1995	tags=40%, list=13%, signal=45%
KEGG_CALCIUM_SIGNALING_PATHWAY	157	-0.548974	-1.96606	0	0.00061223	0.018	2468	tags=39%, list=15%, signal=46%
REACTOME_POTASSIUM_CHANNELS	89	-0.583821	-1.95886	0	0.000716382	0.022	2134	tags=54%, list=13%, signal=62%
BIOCARTA_PDZS_PATHWAY	17	-0.811409	-1.95211	0	0.000784065	0.025	2287	tags=71%, list=14%, signal=82%
REACTOME_CLASS_C_3_METABOTROPIC_GLUTAMATE_PHEROMONE_RECEPTORS	16	-0.824527	-1.95146	0	0.000758772	0.025	1960	tags=56%, list=12%, signal=64%
REACTOME_CREB1_PHOSPHORYLATION_THROUGH_NMDA_RECEPTOR_MEDIATED_ACTIVATION_OF_RAS_SIGNALING	28	-0.719021	-1.91718	0.00235294	0.00152705	0.052	1753	tags=54%, list=11%, signal=60%
REACTOME_UPTAKE_AND_ACTIONS_OF_BACTERIAL_TOXINS	27	-0.723105	-1.91107	0	0.00164735	0.058	1267	tags=48%, list=8%, signal=52%
KEGG_LONG_TERM_POTENTIATION	65	-0.600672	-1.90815	0	0.00170536	0.061	2119	tags=45%, list=13%, signal=51%
REACTOME_ION_HOMEOSTASIS	53	-0.626147	-1.89471	0	0.00215028	0.078	2468	tags=40%, list=15%, signal=47%
REACTOME_SYNAPTIC_ADHESION_LIKE_MOLECULES	21	-0.757768	-1.87805	0	0.00279335	0.105	1753	tags=57%, list=11%, signal=64%
REACTOME_KINESINS	50	-0.620055	-1.86633	0	0.00333561	0.129	1854	tags=32%, list=12%, signal=36%
KEGG_CARDIAC_MUSCLE_CONTRACTION	69	-0.569251	-1.81727	0	0.00754981	0.277	2566	tags=41%, list=16%, signal=48%
REACTOME_OPIOID_SIGNALLING	82	-0.549685	-1.80985	0	0.00830815	0.306	1587	tags=35%, list=10%, signal=39%
REACTOME_ACTIVATION_OF_GENE_EXPRESSION_BY_SREBF_SREBP	42	-0.627027	-1.80638	0	0.00864136	0.315	3467	tags=52%, list=22%, signal=67%
REACTOME_NITRIC_OXIDE_STIMULATES_GUANYLATE_CYCLASE	22	-0.699249	-1.78571	0	0.011596	0.402	2468	tags=59%, list=15%, signal=70%
BIOCARTA_PGC1A_PATHWAY	15	-0.7909	-1.78475	0.00229885	0.0114015	0.404	1892	tags=60%, list=12%, signal=68%
KEGG_NEUROACTIVE_LIGAND_RECEPTOR_INTERACTION	184	-0.483741	-1.77721	0	0.0123354	0.443	2146	tags=36%, list=13%, signal=41%
REACTOME_ION_TRANSPORT_BY_P_TYPE_ATPASES	51	-0.584935	-1.77417	0.00257732	0.0125247	0.46	2311	tags=41%, list=14%, signal=48%
REACTOME_NCAM_SIGNALING_FOR_NEURITE_OUT_GROWTH	58	-0.566771	-1.76661	0	0.0138515	0.496	3224	tags=53%, list=20%, signal=67%
PID_LPA4_PATHWAY	15	-0.769479	-1.76277	0.00218341	0.0142674	0.52	931	tags=33%, list=6%, signal=35%
REACTOME_GABA_RECEPTOR_ACTIVATION	52	-0.581166	-1.76203	0	0.014216	0.525	1713	tags=48%, list=11%, signal=54%
REACTOME_AMINE_LIGAND_BINDING_RECEPTORS	28	-0.654901	-1.75866	0	0.0147107	0.548	2458	tags=46%, list=15%, signal=55%
REACTOME_CGMP_EFFECTS	16	-0.734207	-1.74979	0	0.0164115	0.591	1439	tags=56%, list=9%, signal=62%
BIOCARTA_NDKDYNAMIN_PATHWAY	17	-0.724554	-1.72785	0.00223714	0.0219865	0.696	731	tags=35%, list=5%, signal=37%
PID_REELIN_PATHWAY	28	-0.64292	-1.72514	0.00498753	0.0222447	0.707	1956	tags=43%, list=12%, signal=49%
BIOCARTA_CK1_PATHWAY	15	-0.736981	-1.71752	0.00674157	0.0240924	0.74	2917	tags=60%, list=18%, signal=73%
REACTOME_TRAFFICKING_OF_GLUR2_CONTAINING_AMPA_RECEPTORS	17	-0.718876	-1.69957	0.0140845	0.0292854	0.811	3424	tags=76%, list=21%, signal=97%
BIOCARTA_LIS1_PATHWAY	17	-0.706113	-1.69795	0.00877193	0.0294064	0.82	2011	tags=35%, list=13%, signal=40%
KEGG_TASTE_TRANSDUCTION	27	-0.630096	-1.69522	0.00479616	0.0299689	0.835	1587	tags=37%, list=10%, signal=41%
KEGG_OLFACTORY_TRANSDUCTION	27	-0.638272	-1.69482	0.00473934	0.02953	0.835	2438	tags=44%, list=15%, signal=52%
REACTOME_NETRIN_1_SIGNALING	48	-0.572575	-1.69403	0	0.0293301	0.839	3896	tags=58%, list=24%, signal=77%
REACTOME_L1CAM_INTERACTIONS	111	-0.485746	-1.6883	0.00296736	0.0309751	0.865	1532	tags=27%, list=10%, signal=30%
KEGG_MELANOGENESIS	91	-0.501455	-1.68579	0	0.031489	0.874	1963	tags=25%, list=12%, signal=29%
REACTOME_REGULATION_OF_MECP2_EXPRESSION_AND_ACTIVITY	31	-0.613904	-1.6745	0.00475059	0.0358493	0.902	1995	tags=35%, list=13%, signal=40%
REACTOME_REGULATION_OF_CHOLESTEROL_BIOSYNTHESIS_BY_SREBP_SREBF	55	-0.540622	-1.67442	0	0.0352764	0.902	3467	tags=42%, list=22%, signal=53%
BIOCARTA_NO1_PATHWAY	24	-0.633059	-1.6641	0.00883002	0.0393418	0.929	622	tags=25%, list=4%, signal=26%
REACTOME_INTEGRATION_OF_ENERGY_METABOLISM	97	-0.497596	-1.66395	0	0.0387756	0.929	2212	tags=40%, list=14%, signal=46%
KEGG_GAP_JUNCTION	83	-0.495706	-1.64727	0	0.046015	0.961	3453	tags=42%, list=22%, signal=54%
BIOCARTA_GPCR_PATHWAY	29	-0.608487	-1.64663	0.0113636	0.0456839	0.961	3411	tags=45%, list=21%, signal=57%
PID_CDC42_REG_PATHWAY	30	-0.607439	-1.64371	0.00497512	0.0465458	0.966	2291	tags=33%, list=14%, signal=39%
REACTOME_DARPP_32_EVENTS	23	-0.634115	-1.63778	0.0195599	0.049061	0.972	3346	tags=48%, list=21%, signal=60%
REACTOME_NRAGE_SIGNALS_DEATH_THROUGH_JNK	58	-0.526844	-1.62422	0	0.0559826	0.985	2082	tags=29%, list=13%, signal=34%
KEGG_HEDGEHOG_SIGNALING_PATHWAY	49	-0.540745	-1.62382	0.0100503	0.0553794	0.985	3720	tags=35%, list=23%, signal=45%
REACTOME_REGULATION_OF_INSULIN_SECRETION	69	-0.510453	-1.62025	0	0.0569667	0.986	2210	tags=48%, list=14%, signal=55%
REACTOME_MUSCLE_CONTRACTION	185	-0.445727	-1.61881	0	0.0569748	0.986	2468	tags=33%, list=15%, signal=39%
KEGG_WNT_SIGNALING_PATHWAY	138	-0.456599	-1.61594	0	0.0578327	0.987	2428	tags=31%, list=15%, signal=36%
KEGG_OOCYTE_MEIOSIS	101	-0.463734	-1.59973	0	0.067331	0.995	2212	tags=22%, list=14%, signal=25%
REACTOME_AURKA_ACTIVATION_BY_TPX2	72	-0.490031	-1.59429	0.00246914	0.070088	0.998	3521	tags=31%, list=22%, signal=39%
REACTOME_EFFECTS_OF_PIP2_HYDROLYSIS	26	-0.596654	-1.58629	0.00947867	0.0746315	0.998	2000	tags=42%, list=13%, signal=48%
BIOCARTA_AGR_PATHWAY	31	-0.578071	-1.58497	0.0115741	0.0745802	0.998	1121	tags=23%, list=7%, signal=24%
REACTOME_RAF_ACTIVATION	30	-0.571707	-1.57759	0.0117647	0.0790091	0.998	3598	tags=47%, list=23%, signal=60%
KEGG_PHOSPHATIDYLINOSITOL_SIGNALING_SYSTEM	72	-0.491682	-1.57399	0	0.0810047	0.998	1963	tags=35%, list=12%, signal=39%
PID_PI3KCI_AKT_PATHWAY	35	-0.551645	-1.57166	0.0169903	0.0818194	0.998	3555	tags=46%, list=22%, signal=59%
REACTOME_PKA_MEDIATED_PHOSPHORYLATION_OF_CREB	19	-0.652187	-1.57007	0.0135135	0.081993	0.998	1587	tags=32%, list=10%, signal=35%
REACTOME_RECRUITMENT_OF_MITOTIC_CENTROSOME_PROTEINS_AND_COMPLEXES	81	-0.47505	-1.5591	0.003003	0.0895277	1	3573	tags=32%, list=22%, signal=41%
PID_NFAT_3PATHWAY	53	-0.503321	-1.54968	0.00990099	0.0963074	1	2068	tags=32%, list=13%, signal=37%
KEGG_AXON_GUIDANCE	126	-0.449245	-1.54811	0	0.0965303	1	2840	tags=36%, list=18%, signal=43%
REACTOME_PLATELET_CALCIUM_HOMEOSTASIS	25	-0.596343	-1.54538	0.0235849	0.0979053	1	1052	tags=32%, list=7%, signal=34%
REACTOME_TRANSPORT_OF_INORGANIC_CATIONS_ANIONS_AND_AMINO_ACIDS_OLIGOPEPTIDES	89	-0.463349	-1.54402	0	0.0977854	1	2816	tags=38%, list=18%, signal=46%
REACTOME_COPI_DEPENDENT_GOLGI_TO_ER_RETROGRADE_TRAFFIC	89	-0.454383	-1.54326	0.00561798	0.0972775	1	1861	tags=22%, list=12%, signal=25%
BIOCARTA_CALCINEURIN_PATHWAY	18	-0.646448	-1.54221	0.0175824	0.0971687	1	622	tags=28%, list=4%, signal=29%
REACTOME_MECP2_REGULATES_NEURONAL_RECEPTORS_AND_CHANNELS	16	-0.654273	-1.53186	0.0468085	0.105276	1	1188	tags=31%, list=7%, signal=34%
BIOCARTA_WNT_PATHWAY	22	-0.605967	-1.52404	0.0186047	0.111891	1	3357	tags=50%, list=21%, signal=63%
REACTOME_CHOLESTEROL_BIOSYNTHESIS	24	-0.600765	-1.52371	0.0367647	0.110945	1	3914	tags=58%, list=25%, signal=77%
KEGG_GNRH_SIGNALING_PATHWAY	83	-0.466766	-1.51604	0	0.117433	1	3453	tags=40%, list=22%, signal=50%
BIOCARTA_AT1R_PATHWAY	27	-0.572014	-1.49424	0.0280374	0.139261	1	3411	tags=41%, list=21%, signal=52%
KEGG_LONG_TERM_DEPRESSION	60	-0.47822	-1.4892	0.0199501	0.14378	1	3411	tags=55%, list=21%, signal=70%
REACTOME_REGULATION_OF_PLK1_ACTIVITY_AT_G2_M_TRANSITION	87	-0.450499	-1.48543	0.00895522	0.14678	1	3521	tags=30%, list=22%, signal=38%
REACTOME_RECRUITMENT_OF_NUMA_TO_MITOTIC_CENTROSOMES	88	-0.444391	-1.47565	0.00588235	0.157327	1	3573	tags=33%, list=22%, signal=42%
REACTOME_GOLGI_TO_ER_RETROGRADE_TRANSPORT	122	-0.42456	-1.47513	0.0060241	0.156375	1	1861	tags=23%, list=12%, signal=26%
BIOCARTA_SHH_PATHWAY	15	-0.637335	-1.46917	0.0566038	0.162615	1	3414	tags=53%, list=21%, signal=68%
REACTOME_CONSTITUTIVE_SIGNALING_BY_AKT1_E17K_IN_CANCER	26	-0.566626	-1.46728	0.0255814	0.163246	1	3555	tags=46%, list=22%, signal=59%
REACTOME_INOSITOL_PHOSPHATE_METABOLISM	46	-0.484329	-1.4652	0.0265957	0.164081	1	1005	tags=24%, list=6%, signal=25%
BIOCARTA_PYK2_PATHWAY	27	-0.554152	-1.45912	0.0378251	0.16974	1	3896	tags=56%, list=24%, signal=73%
BIOCARTA_MEF2D_PATHWAY	17	-0.609813	-1.44527	0.0521921	0.187113	1	1963	tags=41%, list=12%, signal=47%
REACTOME_DOWNSTREAM_SIGNALING_OF_ACTIVATED_FGFR1	24	-0.549741	-1.43115	0.0565611	0.205662	1	1997	tags=29%, list=13%, signal=33%
KEGG_PROXIMAL_TUBULE_BICARBONATE_RECLAMATION	21	-0.577301	-1.42208	0.0642857	0.217994	1	2904	tags=52%, list=18%, signal=64%
PID_LKB1_PATHWAY	47	-0.482143	-1.4208	0.0341207	0.217977	1	3811	tags=40%, list=24%, signal=53%
PID_HDAC_CLASSII_PATHWAY	33	-0.508288	-1.41945	0.0330969	0.21803	1	1677	tags=24%, list=11%, signal=27%
KEGG_BUTANOATE_METABOLISM	28	-0.542969	-1.41675	0.0476191	0.22063	1	3022	tags=43%, list=19%, signal=53%
REACTOME_ION_CHANNEL_TRANSPORT	164	-0.392333	-1.41632	0.00321543	0.219023	1	2198	tags=26%, list=14%, signal=30%
REACTOME_G_ALPHA_S_SIGNALLING_EVENTS	107	-0.411914	-1.41341	0.00906344	0.221359	1	2923	tags=40%, list=18%, signal=49%
REACTOME_NCAM1_INTERACTIONS	38	-0.494565	-1.41287	0.0518868	0.220268	1	2493	tags=45%, list=16%, signal=53%
REACTOME_PI_3K_CASCADE_FGFR1	15	-0.613939	-1.40797	0.0798226	0.226446	1	1997	tags=33%, list=13%, signal=38%
PID_SMAD2_3PATHWAY	16	-0.593362	-1.40459	0.0755556	0.229345	1	4414	tags=50%, list=28%, signal=69%
REACTOME_CELL_DEATH_SIGNALLING_VIA_NRAGE_NRIF_AND_NADE	75	-0.430544	-1.40205	0.0299728	0.231558	1	2082	tags=23%, list=13%, signal=26%
REACTOME_CA2_PATHWAY	58	-0.450154	-1.40118	0.0437158	0.230877	1	2094	tags=38%, list=13%, signal=44%
PID_PI3K_PLC_TRK_PATHWAY	36	-0.497039	-1.40083	0.0415648	0.229325	1	3567	tags=44%, list=22%, signal=57%
KEGG_BASAL_CELL_CARCINOMA	51	-0.455231	-1.39953	0.0350877	0.229498	1	3720	tags=35%, list=23%, signal=46%
BIOCARTA_HDAC_PATHWAY	23	-0.539787	-1.39475	0.062069	0.235284	1	622	tags=26%, list=4%, signal=27%
REACTOME_HDMS_DEMETHYLATE_HISTONES	34	-0.50473	-1.39277	0.0519802	0.236253	1	4247	tags=35%, list=27%, signal=48%
REACTOME_SIGNALING_BY_NTRK2_TRKB	23	-0.543965	-1.39221	0.0811456	0.23515	1	681	tags=17%, list=4%, signal=18%
PID_PS1_PATHWAY	43	-0.466986	-1.38871	0.0442708	0.238736	1	3448	tags=49%, list=22%, signal=62%
REACTOME_FRS_MEDIATED_FGFR1_SIGNALING	17	-0.594297	-1.38822	0.0799136	0.237593	1	717	tags=24%, list=4%, signal=25%
REACTOME_NEGATIVE_REGULATION_OF_MAPK_PATHWAY	40	-0.488757	-1.38521	0.0505051	0.240525	1	3598	tags=38%, list=23%, signal=48%
PID_BMP_PATHWAY	39	-0.475617	-1.37881	0.0509709	0.248955	1	3332	tags=41%, list=21%, signal=52%
REACTOME_RUNX1_INTERACTS_WITH_CO_FACTORS_WHOSE_PRECISE_EFFECT_ON_RUNX1_TARGETS_IS_NOT_KNOWN	37	-0.482057	-1.37198	0.0758621	0.258557	1	3090	tags=38%, list=19%, signal=47%
PID_NETRIN_PATHWAY	32	-0.501459	-1.37124	0.0793269	0.257717	1	3896	tags=53%, list=24%, signal=70%
KEGG_BIOSYNTHESIS_OF_UNSATURATED_FATTY_ACIDS	22	-0.540173	-1.36953	0.08	0.258527	1	1174	tags=14%, list=7%, signal=15%
BIOCARTA_NFAT_PATHWAY	46	-0.464643	-1.36846	0.0620155	0.258366	1	3257	tags=39%, list=20%, signal=49%
REACTOME_FRS_MEDIATED_FGFR3_SIGNALING	15	-0.599988	-1.36613	0.108046	0.260471	1	894	tags=27%, list=6%, signal=28%
BIOCARTA_VIP_PATHWAY	25	-0.525329	-1.36321	0.0957684	0.263353	1	622	tags=24%, list=4%, signal=25%
REACTOME_GABA_B_RECEPTOR_ACTIVATION	39	-0.46749	-1.35198	0.0701754	0.280993	1	1713	tags=38%, list=11%, signal=43%
REACTOME_PLATELET_HOMEOSTASIS	80	-0.417135	-1.3519	0.0408719	0.278957	1	2267	tags=38%, list=14%, signal=43%
REACTOME_ADHERENS_JUNCTIONS_INTERACTIONS	31	-0.498716	-1.35175	0.0980392	0.27711	1	1799	tags=29%, list=11%, signal=33%
REACTOME_VEGFR2_MEDIATED_CELL_PROLIFERATION	18	-0.561738	-1.35164	0.124717	0.275223	1	1963	tags=33%, list=12%, signal=38%
REACTOME_INSULIN_PROCESSING	25	-0.518682	-1.34488	0.0898876	0.28495	1	708	tags=24%, list=4%, signal=25%
REACTOME_NOTCH1_INTRACELLULAR_DOMAIN_REGULATES_TRANSCRIPTION	48	-0.455339	-1.34482	0.0384615	0.282946	1	3556	tags=29%, list=22%, signal=37%
REACTOME_IRS_MEDIATED_SIGNALLING	39	-0.470073	-1.34049	0.0930788	0.288585	1	4038	tags=38%, list=25%, signal=51%
KEGG_INOSITOL_PHOSPHATE_METABOLISM	51	-0.444189	-1.33716	0.0739726	0.292728	1	1181	tags=24%, list=7%, signal=25%
REACTOME_MITOTIC_PROMETAPHASE	195	-0.364003	-1.33035	0.0103806	0.303361	1	3655	tags=24%, list=23%, signal=30%
REACTOME_SIGNALING_BY_ERBB4	56	-0.433847	-1.32706	0.0890052	0.307575	1	1956	tags=23%, list=12%, signal=26%
REACTOME_ACTIVATION_OF_BH3_ONLY_PROTEINS	30	-0.486018	-1.32686	0.0935961	0.30572	1	3555	tags=33%, list=22%, signal=43%
REACTOME_PHASE_2_PLATEAU_PHASE	25	-0.5055	-1.32568	0.086747	0.305989	1	2263	tags=56%, list=14%, signal=65%
REACTOME_SIGNALING_BY_FGFR1	43	-0.444884	-1.32383	0.0632911	0.307372	1	3896	tags=37%, list=24%, signal=49%
REACTOME_SIGNALING_BY_NOTCH1_PEST_DOMAIN_MUTANTS_IN_CANCER	58	-0.42033	-1.32367	0.0511509	0.305439	1	3556	tags=29%, list=22%, signal=38%
PID_HDAC_CLASSIII_PATHWAY	24	-0.516548	-1.32002	0.116009	0.310439	1	3590	tags=46%, list=23%, signal=59%
REACTOME_TRANSCRIPTIONAL_ACTIVATION_OF_MITOCHONDRIAL_BIOGENESIS	54	-0.434051	-1.31662	0.075188	0.314978	1	3286	tags=35%, list=21%, signal=44%
REACTOME_GLUCAGON_LIKE_PEPTIDE_1_GLP1_REGULATES_INSULIN_SECRETION	36	-0.47309	-1.31457	0.0904646	0.316507	1	2094	tags=42%, list=13%, signal=48%
REACTOME_FACTORS_INVOLVED_IN_MEGAKARYOCYTE_DEVELOPMENT_AND_PLATELET_PRODUCTION	131	-0.374331	-1.3139	0.0334448	0.315723	1	1620	tags=21%, list=10%, signal=23%
KEGG_ERBB_SIGNALING_PATHWAY	84	-0.400123	-1.3105	0.0512129	0.320199	1	3555	tags=43%, list=22%, signal=55%
REACTOME_SIGNALING_BY_NODAL	18	-0.534618	-1.306	0.151111	0.326817	1	2383	tags=33%, list=15%, signal=39%
KEGG_AMYOTROPHIC_LATERAL_SCLEROSIS_ALS	50	-0.433041	-1.30258	0.0736041	0.331771	1	1753	tags=28%, list=11%, signal=31%
REACTOME_ANCHORING_OF_THE_BASAL_BODY_TO_THE_PLASMA_MEMBRANE	97	-0.386414	-1.30038	0.0379404	0.334049	1	3521	tags=27%, list=22%, signal=34%
PID_CIRCADIAN_PATHWAY	15	-0.562502	-1.30028	0.156322	0.332029	1	859	tags=13%, list=5%, signal=14%
REACTOME_PKA_ACTIVATION_IN_GLUCAGON_SIGNALLING	16	-0.559276	-1.29082	0.155983	0.349258	1	1587	tags=25%, list=10%, signal=28%
REACTOME_ADORA2B_MEDIATED_ANTI_INFLAMMATORY_CYTOKINES_PRODUCTION	81	-0.391937	-1.28819	0.0600601	0.352754	1	2229	tags=33%, list=14%, signal=39%
REACTOME_SIGNALING_BY_NOTCH1	74	-0.407635	-1.28731	0.0733696	0.352197	1	1234	tags=15%, list=8%, signal=16%
PID_NOTCH_PATHWAY	57	-0.416924	-1.28642	0.0824468	0.351727	1	3517	tags=33%, list=22%, signal=43%
REACTOME_SIGNALING_BY_TYPE_1_INSULIN_LIKE_GROWTH_FACTOR_1_RECEPTOR_IGF1R	44	-0.43925	-1.28545	0.100737	0.351413	1	4038	tags=39%, list=25%, signal=52%
KEGG_GLYCOSAMINOGLYCAN_BIOSYNTHESIS_HEPARAN_SULFATE	25	-0.494619	-1.28411	0.140436	0.351952	1	1711	tags=20%, list=11%, signal=22%
PID_RHOA_PATHWAY	44	-0.436363	-1.28001	0.101036	0.358101	1	1669	tags=20%, list=10%, signal=23%
PID_NCADHERIN_PATHWAY	32	-0.459888	-1.27808	0.115979	0.359888	1	2000	tags=25%, list=13%, signal=29%
REACTOME_METABOLISM_OF_STEROIDS	126	-0.36546	-1.27421	0.0506329	0.366297	1	3297	tags=30%, list=21%, signal=38%
REACTOME_PHASE_4_RESTING_MEMBRANE_POTENTIAL	16	-0.548511	-1.27082	0.168467	0.371195	1	1229	tags=44%, list=8%, signal=47%
REACTOME_RESOLUTION_OF_SISTER_CHROMATID_COHESION	118	-0.368785	-1.26893	0.0391566	0.37289	1	3750	tags=23%, list=24%, signal=30%
REACTOME_INWARDLY_RECTIFYING_K_CHANNELS	31	-0.463552	-1.26734	0.167883	0.374102	1	1713	tags=42%, list=11%, signal=47%
PID_RAS_PATHWAY	30	-0.468009	-1.26681	0.126126	0.372979	1	2042	tags=37%, list=13%, signal=42%
REACTOME_SIGNALING_BY_WNT_IN_CANCER	32	-0.453081	-1.26658	0.111905	0.371237	1	3816	tags=47%, list=24%, signal=62%
PID_LIS1_PATHWAY	28	-0.476183	-1.2649	0.144828	0.372763	1	2212	tags=32%, list=14%, signal=37%
KEGG_MAPK_SIGNALING_PATHWAY	241	-0.334769	-1.26462	0.019685	0.371226	1	2337	tags=27%, list=15%, signal=31%
BIOCARTA_CREB_PATHWAY	21	-0.50191	-1.26407	0.146341	0.370193	1	3555	tags=52%, list=22%, signal=67%
KEGG_VASCULAR_SMOOTH_MUSCLE_CONTRACTION	100	-0.372433	-1.26401	0.0565476	0.368121	1	3285	tags=34%, list=21%, signal=43%
KEGG_ALANINE_ASPARTATE_AND_GLUTAMATE_METABOLISM	30	-0.461482	-1.2631	0.14447	0.368024	1	2906	tags=37%, list=18%, signal=45%
PID_INSULIN_GLUCOSE_PATHWAY	24	-0.480669	-1.26116	0.150115	0.369996	1	1818	tags=21%, list=11%, signal=23%
REACTOME_SIGNALING_BY_NTRKS	132	-0.358323	-1.2603	0.0323529	0.369692	1	2350	tags=20%, list=15%, signal=24%
BIOCARTA_IGF1MTOR_PATHWAY	19	-0.524104	-1.25785	0.182418	0.372779	1	3555	tags=37%, list=22%, signal=47%
BIOCARTA_VDR_PATHWAY	23	-0.490707	-1.25687	0.156909	0.37266	1	4644	tags=57%, list=29%, signal=80%
REACTOME_INSULIN_RECEPTOR_SIGNALLING_CASCADE	44	-0.4363	-1.2551	0.127182	0.374105	1	4038	tags=39%, list=25%, signal=52%
REACTOME_SIGNALING_BY_BMP	24	-0.491001	-1.25419	0.181176	0.373998	1	1873	tags=25%, list=12%, signal=28%
REACTOME_RORA_ACTIVATES_GENE_EXPRESSION	18	-0.523866	-1.25327	0.177725	0.373655	1	5021	tags=72%, list=31%, signal=105%
PID_BETA_CATENIN_DEG_PATHWAY	16	-0.538465	-1.24618	0.192149	0.386841	1	2474	tags=44%, list=16%, signal=52%
REACTOME_ACTIVATION_OF_AMPK_DOWNSTREAM_OF_NMDARS	21	-0.505584	-1.24321	0.184579	0.391365	1	2909	tags=43%, list=18%, signal=52%
REACTOME_REGULATION_OF_BETA_CELL_DEVELOPMENT	26	-0.465752	-1.24185	0.163265	0.392532	1	5852	tags=69%, list=37%, signal=109%
BIOCARTA_CARM_ER_PATHWAY	26	-0.472268	-1.24001	0.186441	0.394392	1	3590	tags=54%, list=23%, signal=69%
REACTOME_FRS_MEDIATED_FGFR4_SIGNALING	15	-0.544107	-1.23896	0.164502	0.394444	1	717	tags=20%, list=4%, signal=21%
REACTOME_NOTCH3_ACTIVATION_AND_TRANSMISSION_OF_SIGNAL_TO_THE_NUCLEUS	25	-0.474365	-1.23876	0.167401	0.392782	1	253	tags=12%, list=2%, signal=12%
PID_AURORA_A_PATHWAY	31	-0.457832	-1.23625	0.155606	0.396205	1	3073	tags=29%, list=19%, signal=36%
REACTOME_HSP90_CHAPERONE_CYCLE_FOR_STEROID_HORMONE_RECEPTORS_SHR	49	-0.413963	-1.23082	0.131646	0.4057	1	3705	tags=43%, list=23%, signal=56%
REACTOME_THE_PHOTOTRANSDUCTION_CASCADE	24	-0.472272	-1.22581	0.195011	0.414735	1	2438	tags=38%, list=15%, signal=44%
PID_RETINOIC_ACID_PATHWAY	29	-0.461882	-1.22546	0.193764	0.413266	1	3555	tags=41%, list=22%, signal=53%
REACTOME_DISASSEMBLY_OF_THE_DESTRUCTION_COMPLEX_AND_RECRUITMENT_OF_AXIN_TO_THE_MEMBRANE	27	-0.452577	-1.21887	0.198511	0.426667	1	2291	tags=30%, list=14%, signal=35%
REACTOME_CARBOXYTERMINAL_POST_TRANSLATIONAL_MODIFICATIONS_OF_TUBULIN	32	-0.44603	-1.21886	0.175309	0.424424	1	2915	tags=34%, list=18%, signal=42%
REACTOME_SYNTHESIS_OF_PA	31	-0.448258	-1.21814	0.149626	0.423756	1	2680	tags=29%, list=17%, signal=35%
REACTOME_COPI_MEDIATED_ANTEROGRADE_TRANSPORT	92	-0.363561	-1.21718	0.0685714	0.423845	1	1532	tags=18%, list=10%, signal=20%
REACTOME_ACTIVATION_OF_BAD_AND_TRANSLOCATION_TO_MITOCHONDRIA	15	-0.528055	-1.21597	0.2	0.424567	1	3555	tags=40%, list=22%, signal=51%
REACTOME_SHC_MEDIATED_CASCADE_FGFR1	15	-0.535875	-1.2147	0.242739	0.425158	1	1997	tags=27%, list=13%, signal=30%
REACTOME_DOWNSTREAM_SIGNALING_OF_ACTIVATED_FGFR3	20	-0.487913	-1.21417	0.214765	0.424146	1	3896	tags=45%, list=24%, signal=59%
REACTOME_G_ALPHA_Z_SIGNALLING_EVENTS	43	-0.423204	-1.21244	0.151596	0.425866	1	1506	tags=33%, list=9%, signal=36%
REACTOME_SIGNALING_BY_NOTCH1_HD_DOMAIN_MUTANTS_IN_CANCER	15	-0.53742	-1.20918	0.23871	0.431145	1	167	tags=13%, list=1%, signal=13%
REACTOME_FRS_MEDIATED_FGFR2_SIGNALING	18	-0.508401	-1.20742	0.220044	0.432979	1	3840	tags=44%, list=24%, signal=58%
REACTOME_REGULATION_OF_FZD_BY_UBIQUITINATION	19	-0.497843	-1.20705	0.214912	0.431694	1	3339	tags=37%, list=21%, signal=47%
REACTOME_DOWNSTREAM_SIGNALING_OF_ACTIVATED_FGFR2	23	-0.463608	-1.20675	0.190255	0.430165	1	3896	tags=43%, list=24%, signal=57%
REACTOME_NEGATIVE_REGULATION_OF_FGFR1_SIGNALING	27	-0.446744	-1.20379	0.194379	0.435123	1	3453	tags=37%, list=22%, signal=47%
PID_ERBB4_PATHWAY	36	-0.417382	-1.19369	0.167959	0.456114	1	2857	tags=28%, list=18%, signal=34%
REACTOME_TBC_RABGAPS	43	-0.405823	-1.18887	0.182927	0.465502	1	2488	tags=30%, list=16%, signal=36%
KEGG_VASOPRESSIN_REGULATED_WATER_REABSORPTION	38	-0.420099	-1.18575	0.207143	0.470556	1	3495	tags=34%, list=22%, signal=44%
REACTOME_PI_3K_CASCADE_FGFR2	16	-0.501231	-1.18508	0.277778	0.469774	1	2326	tags=31%, list=15%, signal=37%
REACTOME_SYNTHESIS_OF_IP3_AND_IP4_IN_THE_CYTOSOL	25	-0.461503	-1.18484	0.20354	0.468054	1	1005	tags=32%, list=6%, signal=34%
REACTOME_CHROMATIN_MODIFYING_ENZYMES	234	-0.314209	-1.18399	0.0416667	0.467777	1	4162	tags=30%, list=26%, signal=40%
PID_WNT_CANONICAL_PATHWAY	19	-0.477729	-1.17931	0.206818	0.476983	1	2474	tags=32%, list=16%, signal=37%
REACTOME_BRANCHED_CHAIN_AMINO_ACID_CATABOLISM	21	-0.465613	-1.17782	0.211982	0.478353	1	2547	tags=29%, list=16%, signal=34%
REACTOME_COPI_INDEPENDENT_GOLGI_TO_ER_RETROGRADE_TRAFFIC	45	-0.401615	-1.17686	0.183246	0.47843	1	3654	tags=47%, list=23%, signal=60%
REACTOME_MAPK_FAMILY_SIGNALING_CASCADES	266	-0.310323	-1.17593	0.0551471	0.478393	1	2107	tags=21%, list=13%, signal=24%
KEGG_PROPANOATE_METABOLISM	28	-0.440675	-1.17358	0.21957	0.481692	1	3134	tags=32%, list=20%, signal=40%
KEGG_DILATED_CARDIOMYOPATHY	85	-0.36042	-1.17297	0.16763	0.481026	1	2566	tags=29%, list=16%, signal=35%
REACTOME_PHOSPHORYLATION_SITE_MUTANTS_OF_CTNNB1_ARE_NOT_TARGETED_TO_THE_PROTEASOME_BY_THE_DESTRUCTION_COMPLEX	15	-0.513658	-1.17041	0.268559	0.485034	1	2291	tags=40%, list=14%, signal=47%
REACTOME_BETA_CATENIN_PHOSPHORYLATION_CASCADE	17	-0.493265	-1.1689	0.261062	0.486571	1	2291	tags=35%, list=14%, signal=41%
REACTOME_REGULATION_OF_PYRUVATE_DEHYDROGENASE_PDH_COMPLEX	15	-0.502338	-1.16218	0.26	0.501332	1	2449	tags=33%, list=15%, signal=39%
REACTOME_REGULATION_OF_TP53_ACTIVITY_THROUGH_ACETYLATION	30	-0.416864	-1.16019	0.2343	0.504018	1	3555	tags=43%, list=22%, signal=56%
REACTOME_CLASS_B_2_SECRETIN_FAMILY_RECEPTORS	71	-0.362918	-1.15781	0.171196	0.507349	1	2096	tags=27%, list=13%, signal=31%
REACTOME_NOTCH2_ACTIVATION_AND_TRANSMISSION_OF_SIGNAL_TO_THE_NUCLEUS	22	-0.456197	-1.1575	0.249377	0.505883	1	960	tags=14%, list=6%, signal=14%
REACTOME_FOXO_MEDIATED_TRANSCRIPTION_OF_CELL_DEATH_GENES	15	-0.498595	-1.1574	0.262055	0.50387	1	6065	tags=60%, list=38%, signal=97%
REACTOME_NOTCH_HLH_TRANSCRIPTION_PATHWAY	28	-0.428833	-1.15224	0.235154	0.5146	1	3556	tags=36%, list=22%, signal=46%
SIG_PIP3_SIGNALING_IN_CARDIAC_MYOCTES	66	-0.362753	-1.15139	0.197943	0.514619	1	3672	tags=36%, list=23%, signal=47%
BIOCARTA_EIF4_PATHWAY	24	-0.442335	-1.15095	0.253863	0.513396	1	3555	tags=46%, list=22%, signal=59%
WNT_SIGNALING	82	-0.352905	-1.15045	0.192708	0.512382	1	3720	tags=39%, list=23%, signal=51%
REACTOME_AGGREPHAGY	36	-0.410477	-1.14983	0.233645	0.511656	1	3521	tags=36%, list=22%, signal=46%
BIOCARTA_MTOR_PATHWAY	21	-0.467125	-1.14959	0.285078	0.509924	1	3555	tags=48%, list=22%, signal=61%
REACTOME_SIGNALING_BY_FGFR	74	-0.355556	-1.14869	0.184659	0.509978	1	3453	tags=26%, list=22%, signal=33%
REACTOME_SIGNALING_BY_INSULIN_RECEPTOR	67	-0.358936	-1.14664	0.190981	0.512971	1	2766	tags=25%, list=17%, signal=31%
BIOCARTA_BARRESTIN_SRC_PATHWAY	17	-0.471493	-1.14645	0.286041	0.511211	1	1045	tags=35%, list=7%, signal=38%
PID_RAC1_REG_PATHWAY	38	-0.399428	-1.14542	0.229947	0.511573	1	1878	tags=34%, list=12%, signal=39%
REACTOME_OXIDATIVE_STRESS_INDUCED_SENESCENCE	94	-0.344003	-1.14365	0.167139	0.513818	1	3419	tags=24%, list=21%, signal=31%
REACTOME_SLC_MEDIATED_TRANSMEMBRANE_TRANSPORT	198	-0.308426	-1.14203	0.135338	0.515704	1	2463	tags=23%, list=15%, signal=27%
BIOCARTA_PAR1_PATHWAY	18	-0.470587	-1.13965	0.257778	0.519341	1	1963	tags=33%, list=12%, signal=38%
REACTOME_ORGANELLE_BIOGENESIS_AND_MAINTENANCE	284	-0.297145	-1.13857	0.0789474	0.519905	1	3601	tags=25%, list=23%, signal=32%
REACTOME_INTRA_GOLGI_AND_RETROGRADE_GOLGI_TO_ER_TRAFFIC	190	-0.308735	-1.13748	0.111111	0.520296	1	3267	tags=26%, list=20%, signal=33%
REACTOME_GLUCAGON_SIGNALING_IN_METABOLIC_REGULATION	29	-0.419834	-1.13069	0.272311	0.535528	1	2094	tags=28%, list=13%, signal=32%
REACTOME_ADRENALINE_NORADRENALINE_INHIBITS_INSULIN_SECRETION	25	-0.440924	-1.12973	0.271226	0.535706	1	2210	tags=52%, list=14%, signal=60%
KEGG_ALDOSTERONE_REGULATED_SODIUM_REABSORPTION	37	-0.390371	-1.12959	0.246649	0.533797	1	3224	tags=46%, list=20%, signal=57%
REACTOME_PROTEIN_METHYLATION	17	-0.479881	-1.12936	0.295711	0.532176	1	3144	tags=29%, list=20%, signal=37%
BIOCARTA_IGF1R_PATHWAY	22	-0.43855	-1.12695	0.287805	0.536283	1	3555	tags=50%, list=22%, signal=64%
REACTOME_MISCELLANEOUS_TRANSPORT_AND_BINDING_EVENTS	23	-0.447639	-1.1264	0.301624	0.535536	1	2477	tags=35%, list=16%, signal=41%
REACTOME_P75_NTR_RECEPTOR_MEDIATED_SIGNALLING	96	-0.33513	-1.12553	0.196532	0.535484	1	2082	tags=21%, list=13%, signal=24%
PID_AR_TF_PATHWAY	50	-0.38178	-1.1255	0.241117	0.533324	1	3853	tags=40%, list=24%, signal=53%
REACTOME_SIGNALING_BY_FGFR3	35	-0.403094	-1.12165	0.265882	0.54104	1	3896	tags=40%, list=24%, signal=53%
REACTOME_PEPTIDE_HORMONE_METABOLISM	64	-0.35298	-1.12027	0.239669	0.542344	1	708	tags=14%, list=4%, signal=15%
REACTOME_G_ALPHA_12_13_SIGNALLING_EVENTS	76	-0.348695	-1.11973	0.214876	0.541541	1	2677	tags=33%, list=17%, signal=39%
PID_ENDOTHELIN_PATHWAY	62	-0.359321	-1.11868	0.226158	0.542038	1	1572	tags=21%, list=10%, signal=23%
REACTOME_RECYCLING_PATHWAY_OF_L1	41	-0.383481	-1.11809	0.291339	0.541394	1	1532	tags=22%, list=10%, signal=24%
KEGG_GLIOMA	63	-0.353509	-1.11787	0.245946	0.539831	1	3555	tags=40%, list=22%, signal=51%
KEGG_ENDOCYTOSIS	178	-0.304902	-1.1178	0.140411	0.537811	1	2028	tags=22%, list=13%, signal=25%
KEGG_TYPE_II_DIABETES_MELLITUS	39	-0.386935	-1.11082	0.280098	0.553643	1	2857	tags=46%, list=18%, signal=56%
REACTOME_FLT3_SIGNALING	241	-0.295459	-1.10788	0.186813	0.559076	1	2107	tags=21%, list=13%, signal=24%
REACTOME_DEACTIVATION_OF_THE_BETA_CATENIN_TRANSACTIVATING_COMPLEX	42	-0.380579	-1.10308	0.266319	0.569625	1	4281	tags=38%, list=27%, signal=52%
PID_HEDGEHOG_GLI_PATHWAY	46	-0.366476	-1.09351	0.309927	0.593642	1	3555	tags=37%, list=22%, signal=47%
REACTOME_CILIUM_ASSEMBLY	192	-0.297058	-1.09316	0.201413	0.592311	1	2931	tags=19%, list=18%, signal=23%
KEGG_ARRHYTHMOGENIC_RIGHT_VENTRICULAR_CARDIOMYOPATHY_ARVC	73	-0.340743	-1.09138	0.283379	0.594833	1	2263	tags=26%, list=14%, signal=30%
REACTOME_DOWNSTREAM_SIGNALING_OF_ACTIVATED_FGFR4	20	-0.443596	-1.09115	0.317797	0.593144	1	3896	tags=40%, list=24%, signal=53%
REACTOME_GLUCAGON_TYPE_LIGAND_RECEPTORS	24	-0.422769	-1.08795	0.348668	0.600001	1	2096	tags=42%, list=13%, signal=48%
REACTOME_VASOPRESSIN_REGULATES_RENAL_WATER_HOMEOSTASIS_VIA_AQUAPORINS	35	-0.394398	-1.08647	0.313107	0.60189	1	1587	tags=26%, list=10%, signal=28%
REACTOME_NGF_STIMULATED_TRANSCRIPTION	39	-0.377703	-1.08412	0.298942	0.606104	1	1751	tags=15%, list=11%, signal=17%
REACTOME_GAP_JUNCTION_ASSEMBLY	23	-0.41966	-1.08409	0.335731	0.603863	1	1532	tags=22%, list=10%, signal=24%
REACTOME_RETROGRADE_TRANSPORT_AT_THE_TRANS_GOLGI_NETWORK	49	-0.361817	-1.07973	0.299252	0.613608	1	3083	tags=27%, list=19%, signal=33%
SIG_CD40PATHWAYMAP	33	-0.390851	-1.07234	0.348894	0.631583	1	948	tags=18%, list=6%, signal=19%
REACTOME_EGR2_AND_SOX10_MEDIATED_INITIATION_OF_SCHWANN_CELL_MYELINATION	28	-0.403569	-1.0707	0.345972	0.633906	1	4196	tags=43%, list=26%, signal=58%
KEGG_ARGININE_AND_PROLINE_METABOLISM	48	-0.355216	-1.06919	0.354054	0.635832	1	2764	tags=27%, list=17%, signal=33%
KEGG_ALZHEIMERS_DISEASE	155	-0.298213	-1.06601	0.263323	0.642504	1	2503	tags=20%, list=16%, signal=23%
KEGG_PYRUVATE_METABOLISM	33	-0.392617	-1.06549	0.36855	0.641631	1	3003	tags=33%, list=19%, signal=41%
REACTOME_SIGNALING_BY_FGFR4	34	-0.383082	-1.0651	0.357868	0.640431	1	3896	tags=38%, list=24%, signal=50%
PID_P53_REGULATION_PATHWAY	59	-0.341324	-1.0642	0.351124	0.64067	1	4134	tags=25%, list=26%, signal=34%
REACTOME_CLATHRIN_MEDIATED_ENDOCYTOSIS	139	-0.30226	-1.06412	0.267062	0.638515	1	1098	tags=15%, list=7%, signal=16%
PID_ERBB2_ERBB3_PATHWAY	43	-0.366023	-1.06337	0.332518	0.638171	1	3668	tags=37%, list=23%, signal=48%
REACTOME_HSF1_DEPENDENT_TRANSACTIVATION	35	-0.372385	-1.05759	0.344743	0.652444	1	3705	tags=31%, list=23%, signal=41%
BIOCARTA_CHREBP_PATHWAY	16	-0.454366	-1.05756	0.379464	0.650108	1	3238	tags=38%, list=20%, signal=47%
REACTOME_MITOCHONDRIAL_BIOGENESIS	92	-0.313156	-1.05533	0.324324	0.654031	1	3935	tags=34%, list=25%, signal=44%
REACTOME_RAP1_SIGNALLING	15	-0.455149	-1.0521	0.403471	0.661179	1	1694	tags=33%, list=11%, signal=37%
PID_THROMBIN_PAR1_PATHWAY	41	-0.362494	-1.05067	0.35533	0.662687	1	1963	tags=29%, list=12%, signal=33%
REACTOME_NEGATIVE_REGULATION_OF_FGFR3_SIGNALING	24	-0.408947	-1.04987	0.351695	0.662528	1	3840	tags=42%, list=24%, signal=55%
REACTOME_SIGNALING_BY_MODERATE_KINASE_ACTIVITY_BRAF_MUTANTS	42	-0.359628	-1.04622	0.343832	0.670735	1	1437	tags=26%, list=9%, signal=29%
REACTOME_NEGATIVE_REGULATION_OF_FGFR2_SIGNALING	27	-0.389768	-1.04407	0.38756	0.674853	1	3840	tags=41%, list=24%, signal=54%
REACTOME_SIGNALING_BY_WNT	289	-0.270592	-1.04367	0.292035	0.673617	1	2521	tags=21%, list=16%, signal=24%
REACTOME_AQUAPORIN_MEDIATED_TRANSPORT	40	-0.355209	-1.04007	0.39206	0.681909	1	1587	tags=23%, list=10%, signal=25%
REACTOME_WNT5A_DEPENDENT_INTERNALIZATION_OF_FZD4	15	-0.455228	-1.03568	0.40393	0.692391	1	3062	tags=40%, list=19%, signal=49%
REACTOME_BLOOD_GROUP_SYSTEMS_BIOSYNTHESIS	16	-0.443984	-1.03329	0.425806	0.697169	1	3310	tags=38%, list=21%, signal=47%
REACTOME_INLB_MEDIATED_ENTRY_OF_LISTERIA_MONOCYTOGENES_INTO_HOST_CELL	15	-0.449331	-1.03321	0.419565	0.694924	1	1751	tags=20%, list=11%, signal=22%
REACTOME_CELL_CELL_JUNCTION_ORGANIZATION	51	-0.342395	-1.03004	0.400517	0.702037	1	2351	tags=24%, list=15%, signal=28%
REACTOME_SIGNALING_BY_NOTCH2	33	-0.374258	-1.02958	0.385542	0.700927	1	960	tags=12%, list=6%, signal=13%
REACTOME_ACTIVATION_OF_KAINATE_RECEPTORS_UPON_GLUTAMATE_BINDING	27	-0.387044	-1.02886	0.398082	0.700572	1	964	tags=26%, list=6%, signal=28%
REACTOME_ACTIVATION_OF_SMO	17	-0.433683	-1.02857	0.43018	0.69903	1	1045	tags=18%, list=7%, signal=19%
REACTOME_EPHRIN_SIGNALING	19	-0.426411	-1.02845	0.411899	0.696906	1	3453	tags=47%, list=22%, signal=60%
BIOCARTA_BIOPEPTIDES_PATHWAY	26	-0.377787	-1.02799	0.402778	0.695858	1	622	tags=15%, list=4%, signal=16%
REACTOME_RET_SIGNALING	36	-0.363984	-1.02761	0.408416	0.694525	1	2350	tags=25%, list=15%, signal=29%
PID_IGF1_PATHWAY	29	-0.382129	-1.02557	0.411765	0.698173	1	3555	tags=31%, list=22%, signal=40%
REACTOME_PI_METABOLISM	79	-0.31436	-1.02455	0.40678	0.698814	1	2857	tags=27%, list=18%, signal=32%
KEGG_ABC_TRANSPORTERS	39	-0.357876	-1.02239	0.418182	0.7029	1	2150	tags=15%, list=13%, signal=18%
REACTOME_DEPOLYMERISATION_OF_THE_NUCLEAR_LAMINA	15	-0.441332	-1.01889	0.458422	0.710762	1	1963	tags=20%, list=12%, signal=23%
REACTOME_ABC_TRANSPORTERS_IN_LIPID_HOMEOSTASIS	15	-0.451523	-1.01543	0.459227	0.718634	1	2150	tags=20%, list=13%, signal=23%
REACTOME_BILE_ACID_AND_BILE_SALT_METABOLISM	33	-0.360443	-1.01538	0.430318	0.716394	1	2449	tags=27%, list=15%, signal=32%
KEGG_LYSINE_DEGRADATION	44	-0.342968	-1.01398	0.4125	0.718211	1	2881	tags=25%, list=18%, signal=30%
REACTOME_ERCC6_CSB_AND_EHMT2_G9A_POSITIVELY_REGULATE_RRNA_EXPRESSION	48	-0.339931	-1.01153	0.434568	0.722871	1	3459	tags=23%, list=22%, signal=29%
REACTOME_SUMOYLATION_OF_TRANSCRIPTION_COFACTORS	43	-0.342887	-1.011	0.406736	0.721956	1	4319	tags=33%, list=27%, signal=45%
REACTOME_MAPK_TARGETS_NUCLEAR_EVENTS_MEDIATED_BY_MAP_KINASES	30	-0.37824	-1.0109	0.42602	0.719829	1	2783	tags=30%, list=17%, signal=36%
REACTOME_ACTIVATED_NOTCH1_TRANSMITS_SIGNAL_TO_THE_NUCLEUS	31	-0.364907	-1.00861	0.419048	0.724441	1	1234	tags=16%, list=8%, signal=17%
KEGG_NITROGEN_METABOLISM	20	-0.408952	-1.00541	0.412946	0.731591	1	754	tags=15%, list=5%, signal=16%
PID_WNT_NONCANONICAL_PATHWAY	31	-0.374016	-1.00485	0.423377	0.730696	1	1631	tags=23%, list=10%, signal=25%
PID_FAK_PATHWAY	57	-0.326879	-1.00473	0.457584	0.728707	1	2609	tags=30%, list=16%, signal=36%
REACTOME_CIRCADIAN_CLOCK	67	-0.316981	-0.999035	0.452055	0.743641	1	3732	tags=34%, list=23%, signal=45%
REACTOME_SYNTHESIS_OF_BILE_ACIDS_AND_BILE_SALTS	28	-0.377326	-0.998915	0.450602	0.741605	1	3286	tags=32%, list=21%, signal=40%
BIOCARTA_CDMAC_PATHWAY	16	-0.419432	-0.997681	0.443662	0.742921	1	3224	tags=38%, list=20%, signal=47%
REACTOME_THE_CANONICAL_RETINOID_CYCLE_IN_RODS_TWILIGHT_VISION	18	-0.411678	-0.995291	0.438597	0.747882	1	1150	tags=11%, list=7%, signal=12%
REACTOME_POLO_LIKE_KINASE_MEDIATED_EVENTS	16	-0.427398	-0.994417	0.470588	0.747993	1	6513	tags=63%, list=41%, signal=106%
REACTOME_NOTCH4_INTRACELLULAR_DOMAIN_REGULATES_TRANSCRIPTION	20	-0.39531	-0.994119	0.446154	0.746422	1	4134	tags=40%, list=26%, signal=54%
SIG_REGULATION_OF_THE_ACTIN_CYTOSKELETON_BY_RHO_GTPASES	32	-0.365914	-0.988513	0.502475	0.761428	1	1121	tags=19%, list=7%, signal=20%
REACTOME_DOWNREGULATION_OF_SMAD2_3_SMAD4_TRANSCRIPTIONAL_ACTIVITY	23	-0.383456	-0.98815	0.436123	0.760095	1	2142	tags=17%, list=13%, signal=20%
REACTOME_RAB_GERANYLGERANYLATION	62	-0.314378	-0.984677	0.479452	0.768279	1	2802	tags=26%, list=18%, signal=31%
REACTOME_MITOTIC_SPINDLE_CHECKPOINT	109	-0.287324	-0.983731	0.482857	0.768679	1	3750	tags=19%, list=24%, signal=25%
PID_BETA_CATENIN_NUC_PATHWAY	69	-0.304042	-0.983112	0.476965	0.768076	1	4427	tags=42%, list=28%, signal=58%
REACTOME_ONCOGENIC_MAPK_SIGNALING	68	-0.308226	-0.981075	0.493473	0.772078	1	1772	tags=24%, list=11%, signal=26%
PID_RET_PATHWAY	38	-0.344386	-0.980732	0.450935	0.770718	1	2609	tags=26%, list=16%, signal=31%
REACTOME_RNA_POLYMERASE_III_TRANSCRIPTION	41	-0.338721	-0.977707	0.477723	0.777667	1	3553	tags=27%, list=22%, signal=34%
PID_FOXO_PATHWAY	46	-0.330465	-0.977584	0.512376	0.775607	1	3555	tags=30%, list=22%, signal=39%
KEGG_TIGHT_JUNCTION	108	-0.285182	-0.974839	0.525223	0.781649	1	3555	tags=34%, list=22%, signal=44%
KEGG_HYPERTROPHIC_CARDIOMYOPATHY_HCM	78	-0.298734	-0.973619	0.50266	0.78288	1	2664	tags=28%, list=17%, signal=34%
PID_ERBB1_INTERNALIZATION_PATHWAY	41	-0.335156	-0.972062	0.485981	0.785203	1	3129	tags=27%, list=20%, signal=33%
REACTOME_PHOSPHOLIPID_METABOLISM	190	-0.264588	-0.971977	0.509158	0.783017	1	2857	tags=22%, list=18%, signal=27%
REACTOME_NUCLEAR_EVENTS_KINASE_AND_TRANSCRIPTION_FACTOR_ACTIVATION	61	-0.311946	-0.971832	0.518518	0.781006	1	2212	tags=18%, list=14%, signal=21%
REACTOME_ONCOGENE_INDUCED_SENESCENCE	33	-0.351017	-0.970348	0.487059	0.783091	1	2609	tags=18%, list=16%, signal=22%
REACTOME_SUMOYLATION_OF_DNA_METHYLATION_PROTEINS	16	-0.417152	-0.967351	0.475556	0.789669	1	4931	tags=50%, list=31%, signal=72%
PID_P38_MKK3_6PATHWAY	26	-0.365807	-0.961783	0.503268	0.804025	1	3116	tags=31%, list=20%, signal=38%
REACTOME_WNT_LIGAND_BIOGENESIS_AND_TRAFFICKING	22	-0.389626	-0.9615	0.530713	0.80236	1	1851	tags=18%, list=12%, signal=21%
PID_CDC42_PATHWAY	69	-0.304724	-0.959979	0.52459	0.804432	1	2609	tags=26%, list=16%, signal=31%
REACTOME_SYNTHESIS_OF_PIPS_AT_THE_EARLY_ENDOSOME_MEMBRANE	16	-0.411089	-0.957772	0.497778	0.808946	1	6075	tags=75%, list=38%, signal=121%
REACTOME_MITOCHONDRIAL_CALCIUM_ION_TRANSPORT	23	-0.372566	-0.957074	0.531178	0.808598	1	1037	tags=17%, list=7%, signal=19%
REACTOME_EPH_EPHRIN_MEDIATED_REPULSION_OF_CELLS	50	-0.320102	-0.955754	0.540201	0.810143	1	3453	tags=36%, list=22%, signal=46%
REACTOME_DNA_DOUBLE_STRAND_BREAK_RESPONSE	60	-0.309331	-0.954497	0.535714	0.811481	1	3201	tags=15%, list=20%, signal=19%
REACTOME_RHO_GTPASES_ACTIVATE_FORMINS	132	-0.270505	-0.953544	0.611987	0.811878	1	3522	tags=21%, list=22%, signal=27%
PID_TRKR_PATHWAY	59	-0.307288	-0.9463	0.55409	0.8315	1	1956	tags=22%, list=12%, signal=25%
KEGG_PURINE_METABOLISM	145	-0.266389	-0.945216	0.654088	0.832233	1	1332	tags=10%, list=8%, signal=10%
REACTOME_INSULIN_RECEPTOR_RECYCLING	24	-0.362402	-0.941703	0.558195	0.840477	1	1825	tags=25%, list=11%, signal=28%
BIOCARTA_CELLCYCLE_PATHWAY	23	-0.368196	-0.941459	0.529274	0.838688	1	3664	tags=26%, list=23%, signal=34%
REACTOME_CELLULAR_RESPONSE_TO_HEAT_STRESS	98	-0.280002	-0.939356	0.582609	0.842473	1	3521	tags=20%, list=22%, signal=26%
REACTOME_SIGNALING_BY_FGFR2	63	-0.295978	-0.938524	0.592308	0.842485	1	3453	tags=25%, list=22%, signal=32%
REACTOME_SEALING_OF_THE_NUCLEAR_ENVELOPE_NE_BY_ESCRT_III	25	-0.358496	-0.937888	0.530093	0.841877	1	2909	tags=28%, list=18%, signal=34%
REACTOME_TRANSLOCATION_OF_SLC2A4_GLUT4_TO_THE_PLASMA_MEMBRANE	64	-0.296526	-0.937827	0.583799	0.839596	1	1532	tags=14%, list=10%, signal=15%
REACTOME_RMTS_METHYLATE_HISTONE_ARGININES	52	-0.308052	-0.937707	0.581395	0.837464	1	3636	tags=25%, list=23%, signal=32%
REACTOME_NEGATIVE_REGULATION_OF_FGFR4_SIGNALING	24	-0.361337	-0.937378	0.548975	0.836	1	3840	tags=38%, list=24%, signal=49%
REACTOME_PKMTS_METHYLATE_HISTONE_LYSINES	54	-0.311367	-0.937338	0.592	0.833674	1	4609	tags=41%, list=29%, signal=57%
REACTOME_COOPERATION_OF_PDCL_PHLP1_AND_TRIC_CCT_IN_G_PROTEIN_BETA_FOLDING	36	-0.329025	-0.93563	0.563591	0.836504	1	1493	tags=22%, list=9%, signal=24%
REACTOME_FOXO_MEDIATED_TRANSCRIPTION_OF_CELL_CYCLE_GENES	17	-0.393824	-0.934762	0.548458	0.836615	1	2748	tags=29%, list=17%, signal=35%
REACTOME_POST_CHAPERONIN_TUBULIN_FOLDING_PATHWAY	17	-0.394908	-0.930567	0.550218	0.84688	1	3061	tags=35%, list=19%, signal=44%
REACTOME_GAP_JUNCTION_TRAFFICKING_AND_REGULATION	36	-0.339395	-0.930133	0.522388	0.845686	1	1532	tags=17%, list=10%, signal=18%
KEGG_PROGESTERONE_MEDIATED_OOCYTE_MATURATION	80	-0.280205	-0.929783	0.621302	0.844329	1	3913	tags=39%, list=25%, signal=51%
REACTOME_SUMOYLATION_OF_INTRACELLULAR_RECEPTORS	27	-0.345276	-0.919884	0.584444	0.871546	1	2705	tags=30%, list=17%, signal=36%
REACTOME_RNA_POLYMERASE_I_TRANSCRIPTION_INITIATION	47	-0.307127	-0.919431	0.595477	0.870409	1	3459	tags=23%, list=22%, signal=30%
KEGG_VIBRIO_CHOLERAE_INFECTION	51	-0.306685	-0.918937	0.625616	0.869339	1	1963	tags=22%, list=12%, signal=25%
REACTOME_STIMULI_SENSING_CHANNELS	92	-0.275722	-0.918825	0.668508	0.867225	1	2122	tags=20%, list=13%, signal=22%
PID_TCR_CALCIUM_PATHWAY	21	-0.357462	-0.912077	0.590476	0.884607	1	1091	tags=19%, list=7%, signal=20%
REACTOME_CRMPS_IN_SEMA3A_SIGNALING	16	-0.392396	-0.91157	0.562105	0.883687	1	1921	tags=31%, list=12%, signal=35%
BIOCARTA_PITX2_PATHWAY	15	-0.400805	-0.910442	0.581292	0.884701	1	2291	tags=27%, list=14%, signal=31%
REACTOME_PI3K_EVENTS_IN_ERBB2_SIGNALING	15	-0.395324	-0.906995	0.584362	0.892445	1	3431	tags=33%, list=22%, signal=42%
PID_RHODOPSIN_PATHWAY	15	-0.38782	-0.905987	0.593819	0.89275	1	2672	tags=33%, list=17%, signal=40%
REACTOME_HDACS_DEACETYLATE_HISTONES	60	-0.292006	-0.904898	0.660668	0.893507	1	3459	tags=20%, list=22%, signal=25%
REACTOME_VISUAL_PHOTOTRANSDUCTION	74	-0.277671	-0.903273	0.6703	0.895643	1	2738	tags=22%, list=17%, signal=26%
REACTOME_INSERTION_OF_TAIL_ANCHORED_PROTEINS_INTO_THE_ENDOPLASMIC_RETICULUM_MEMBRANE	22	-0.355034	-0.899786	0.593023	0.903419	1	207	tags=9%, list=1%, signal=9%
BIOCARTA_PTEN_PATHWAY	17	-0.376969	-0.896342	0.609865	0.910968	1	3555	tags=53%, list=22%, signal=68%
BIOCARTA_IGF1_PATHWAY	21	-0.351575	-0.895237	0.617068	0.911557	1	3421	tags=33%, list=21%, signal=42%
REACTOME_ESR_MEDIATED_SIGNALING	184	-0.245168	-0.895222	0.835714	0.909097	1	3555	tags=28%, list=22%, signal=36%
BIOCARTA_CXCR4_PATHWAY	18	-0.373018	-0.893469	0.61987	0.911607	1	3896	tags=56%, list=24%, signal=73%
BIOCARTA_CCR5_PATHWAY	17	-0.379341	-0.888784	0.631347	0.922318	1	622	tags=24%, list=4%, signal=24%
REACTOME_ERK_MAPK_TARGETS	22	-0.355768	-0.886837	0.657388	0.925154	1	3224	tags=36%, list=20%, signal=46%
BIOCARTA_INSULIN_PATHWAY	21	-0.357288	-0.88511	0.638695	0.927579	1	3421	tags=33%, list=21%, signal=42%
REACTOME_MEIOSIS	83	-0.272481	-0.883069	0.717742	0.930573	1	4145	tags=23%, list=26%, signal=31%
REACTOME_SYNTHESIS_OF_PIPS_AT_THE_PLASMA_MEMBRANE	51	-0.29343	-0.88073	0.6875	0.934546	1	3443	tags=33%, list=22%, signal=42%
PID_MTOR_4PATHWAY	68	-0.275215	-0.880329	0.731638	0.933213	1	3697	tags=35%, list=23%, signal=46%
REACTOME_REGULATION_OF_TP53_ACTIVITY	157	-0.246803	-0.879946	0.833333	0.931786	1	3555	tags=23%, list=22%, signal=29%
REACTOME_MEIOTIC_SYNAPSIS	54	-0.284125	-0.879368	0.718833	0.930907	1	4054	tags=26%, list=25%, signal=35%
PID_HIF1A_PATHWAY	19	-0.35766	-0.879056	0.639723	0.929331	1	3521	tags=26%, list=22%, signal=34%
REACTOME_PYRUVATE_METABOLISM	26	-0.334633	-0.875559	0.673563	0.936133	1	2470	tags=27%, list=15%, signal=32%
BIOCARTA_EGF_PATHWAY	27	-0.323711	-0.874453	0.64	0.936572	1	3224	tags=30%, list=20%, signal=37%
REACTOME_ESTROGEN_DEPENDENT_GENE_EXPRESSION	120	-0.250595	-0.872805	0.849162	0.938355	1	4309	tags=29%, list=27%, signal=40%
REACTOME_FOXO_MEDIATED_TRANSCRIPTION	60	-0.278323	-0.867935	0.783375	0.948787	1	3590	tags=30%, list=23%, signal=39%
REACTOME_G_PROTEIN_ACTIVATION	21	-0.344168	-0.865181	0.663594	0.953537	1	1493	tags=33%, list=9%, signal=37%
REACTOME_SIGNALING_BY_ERBB2	48	-0.288844	-0.860967	0.73385	0.961855	1	3555	tags=29%, list=22%, signal=37%
REACTOME_LISTERIA_MONOCYTOGENES_ENTRY_INTO_HOST_CELLS	20	-0.351666	-0.859656	0.675676	0.962668	1	1751	tags=15%, list=11%, signal=17%
REACTOME_CYTOCHROME_P450_ARRANGED_BY_SUBSTRATE_TYPE	40	-0.296178	-0.859252	0.731646	0.961312	1	3404	tags=35%, list=21%, signal=44%
BIOCARTA_EDG1_PATHWAY	22	-0.337795	-0.858361	0.727483	0.961074	1	3555	tags=50%, list=22%, signal=64%
REACTOME_SHC1_EVENTS_IN_ERBB2_SIGNALING	21	-0.351365	-0.856499	0.660173	0.96335	1	3431	tags=33%, list=22%, signal=42%
PID_NEPHRIN_NEPH1_PATHWAY	28	-0.319189	-0.855224	0.723502	0.964037	1	948	tags=14%, list=6%, signal=15%
BIOCARTA_MAL_PATHWAY	18	-0.356615	-0.853501	0.665904	0.965797	1	3224	tags=33%, list=20%, signal=42%
REACTOME_CYTOSOLIC_SULFONATION_OF_SMALL_MOLECULES	21	-0.3417	-0.850577	0.65708	0.970438	1	469	tags=10%, list=3%, signal=10%
REACTOME_SIGNALING_BY_NUCLEAR_RECEPTORS	250	-0.225961	-0.847175	0.94958	0.976402	1	3453	tags=25%, list=22%, signal=32%
KEGG_GLYCEROPHOSPHOLIPID_METABOLISM	67	-0.268179	-0.846614	0.835897	0.975207	1	2199	tags=18%, list=14%, signal=21%
REACTOME_SELECTIVE_AUTOPHAGY	73	-0.258165	-0.845295	0.827397	0.975807	1	3521	tags=29%, list=22%, signal=37%
REACTOME_HATS_ACETYLATE_HISTONES	108	-0.247957	-0.839562	0.891117	0.987319	1	5031	tags=33%, list=32%, signal=48%
PID_MET_PATHWAY	79	-0.257722	-0.838788	0.828255	0.986642	1	3555	tags=25%, list=22%, signal=32%
KEGG_BETA_ALANINE_METABOLISM	20	-0.334975	-0.837685	0.726862	0.986692	1	1817	tags=20%, list=11%, signal=23%
REACTOME_TRANSCRIPTIONAL_REGULATION_BY_THE_AP_2_TFAP2_FAMILY_OF_TRANSCRIPTION_FACTORS	32	-0.303821	-0.836198	0.756098	0.987613	1	3580	tags=28%, list=22%, signal=36%
PID_EPHB_FWD_PATHWAY	39	-0.297906	-0.833589	0.744624	0.990829	1	3453	tags=41%, list=22%, signal=52%
KEGG_TGF_BETA_SIGNALING_PATHWAY	81	-0.249204	-0.828249	0.873156	1	1	3332	tags=23%, list=21%, signal=30%
PID_AR_NONGENOMIC_PATHWAY	31	-0.308525	-0.827735	0.767386	0.998794	1	3991	tags=48%, list=25%, signal=64%
KEGG_GLYCOSPHINGOLIPID_BIOSYNTHESIS_LACTO_AND_NEOLACTO_SERIES	22	-0.320953	-0.823943	0.754386	1	1	2675	tags=27%, list=17%, signal=33%
REACTOME_NEPHRIN_FAMILY_INTERACTIONS	20	-0.328864	-0.821276	0.72093	1	1	2350	tags=35%, list=15%, signal=41%
REACTOME_SUMOYLATION_OF_CHROMATIN_ORGANIZATION_PROTEINS	63	-0.265509	-0.81998	0.83727	1	1	4414	tags=24%, list=28%, signal=33%
REACTOME_PROCESSING_OF_SMDT1	16	-0.353505	-0.816859	0.732484	1	1	1988	tags=19%, list=12%, signal=21%
BIOCARTA_TEL_PATHWAY	17	-0.347602	-0.816142	0.742729	1	1	3816	tags=41%, list=24%, signal=54%
KEGG_VALINE_LEUCINE_AND_ISOLEUCINE_DEGRADATION	43	-0.278561	-0.816047	0.803618	1	1	3022	tags=23%, list=19%, signal=29%
REACTOME_RNA_POLYMERASE_III_TRANSCRIPTION_INITIATION_FROM_TYPE_3_PROMOTER	28	-0.308806	-0.81344	0.781395	1	1	3021	tags=21%, list=19%, signal=26%
REACTOME_REGULATION_OF_PTEN_GENE_TRANSCRIPTION	61	-0.258883	-0.811892	0.866337	1	1	2660	tags=21%, list=17%, signal=25%
REACTOME_VXPX_CARGO_TARGETING_TO_CILIUM	18	-0.334107	-0.810253	0.770419	1	1	3379	tags=28%, list=21%, signal=35%
REACTOME_NR1H2_AND_NR1H3_MEDIATED_SIGNALING	42	-0.280743	-0.806436	0.833735	1	1	2515	tags=24%, list=16%, signal=28%
REACTOME_RAF_INDEPENDENT_MAPK1_3_ACTIVATION	23	-0.316773	-0.802528	0.733624	1	1	3421	tags=30%, list=21%, signal=39%
BIOCARTA_ARENRF2_PATHWAY	19	-0.329348	-0.80165	0.778509	1	1	390	tags=11%, list=2%, signal=11%
REACTOME_SIGNALING_BY_PTK6	52	-0.26203	-0.801503	0.876676	1	1	3555	tags=35%, list=22%, signal=44%
REACTOME_FATTY_ACYL_COA_BIOSYNTHESIS	33	-0.290855	-0.801128	0.825882	1	1	992	tags=12%, list=6%, signal=13%
REACTOME_OLFACTORY_SIGNALING_PATHWAY	15	-0.345588	-0.801065	0.734341	1	1	2923	tags=40%, list=18%, signal=49%
REACTOME_CYCLIN_A_B1_B2_ASSOCIATED_EVENTS_DURING_G2_M_TRANSITION	25	-0.310934	-0.799288	0.796296	1	1	3664	tags=20%, list=23%, signal=26%
REACTOME_SIGNALING_BY_NTRK3_TRKC	16	-0.354097	-0.798507	0.735499	1	1	3896	tags=38%, list=24%, signal=50%
PID_S1P_S1P2_PATHWAY	24	-0.306273	-0.794627	0.807407	1	1	1417	tags=21%, list=9%, signal=23%
PID_PDGFRA_PATHWAY	20	-0.3252	-0.793741	0.773973	1	1	3896	tags=30%, list=24%, signal=40%
BIOCARTA_MTA3_PATHWAY	17	-0.327343	-0.793719	0.764019	1	1	1242	tags=18%, list=8%, signal=19%
REACTOME_SIGNALING_BY_NOTCH3	49	-0.263991	-0.792636	0.879679	1	1	3556	tags=29%, list=22%, signal=37%
KEGG_GLYCEROLIPID_METABOLISM	43	-0.269277	-0.791724	0.878049	1	1	3563	tags=33%, list=22%, signal=42%
REACTOME_PYRUVATE_METABOLISM_AND_CITRIC_ACID_TCA_CYCLE	50	-0.259637	-0.789844	0.874109	1	1	3134	tags=24%, list=20%, signal=30%
PID_EPHA2_FWD_PATHWAY	19	-0.318809	-0.78847	0.78032	1	1	2556	tags=26%, list=16%, signal=31%
KEGG_CITRATE_CYCLE_TCA_CYCLE	28	-0.294434	-0.787699	0.804762	1	1	3134	tags=25%, list=20%, signal=31%
REACTOME_NUCLEAR_SIGNALING_BY_ERBB4	30	-0.287222	-0.787504	0.819222	1	1	1760	tags=20%, list=11%, signal=22%
REACTOME_SPRY_REGULATION_OF_FGF_SIGNALING	16	-0.332371	-0.787472	0.775281	1	1	3453	tags=38%, list=22%, signal=48%
REACTOME_FGFR2_MUTANT_RECEPTOR_ACTIVATION	26	-0.293645	-0.784497	0.826879	1	1	2326	tags=15%, list=15%, signal=18%
PID_PLK1_PATHWAY	45	-0.2643	-0.780058	0.865079	1	1	4039	tags=22%, list=25%, signal=30%
PID_ATM_PATHWAY	34	-0.274842	-0.779379	0.848341	1	1	4423	tags=21%, list=28%, signal=28%
KEGG_MELANOMA	62	-0.250119	-0.776317	0.927536	1	1	3840	tags=34%, list=24%, signal=44%
REACTOME_HS_GAG_BIOSYNTHESIS	29	-0.28743	-0.776286	0.857831	1	1	4413	tags=38%, list=28%, signal=52%
REACTOME_METABOLISM_OF_NITRIC_OXIDE_ENOS_ACTIVATION_AND_REGULATION	15	-0.341847	-0.775705	0.808411	1	1	671	tags=13%, list=4%, signal=14%
BIOCARTA_GLEEVEC_PATHWAY	23	-0.306802	-0.774684	0.827751	1	1	1956	tags=22%, list=12%, signal=25%
REACTOME_SEMA3A_PAK_DEPENDENT_AXON_REPULSION	16	-0.331069	-0.774229	0.773913	1	1	1921	tags=25%, list=12%, signal=28%
REACTOME_GLYCEROPHOSPHOLIPID_BIOSYNTHESIS	112	-0.225271	-0.767123	0.985507	1	1	2777	tags=19%, list=17%, signal=23%
KEGG_NOTCH_SIGNALING_PATHWAY	46	-0.257735	-0.76351	0.882064	1	1	3459	tags=28%, list=22%, signal=36%
REACTOME_RNA_POLYMERASE_III_TRANSCRIPTION_INITIATION_FROM_TYPE_1_PROMOTER	28	-0.283055	-0.762193	0.858881	1	1	4282	tags=29%, list=27%, signal=39%
REACTOME_FORMATION_OF_TUBULIN_FOLDING_INTERMEDIATES_BY_CCT_TRIC	21	-0.306569	-0.760847	0.832151	1	1	2909	tags=24%, list=18%, signal=29%
KEGG_CELL_CYCLE	122	-0.216353	-0.75595	0.985207	1	1	3710	tags=18%, list=23%, signal=23%
REACTOME_SIGNALING_BY_FGFR1_IN_DISEASE	33	-0.272338	-0.754093	0.89	1	1	4043	tags=36%, list=25%, signal=49%
REACTOME_SYNTHESIS_OF_BILE_ACIDS_AND_BILE_SALTS_VIA_7ALPHA_HYDROXYCHOLESTEROL	18	-0.31617	-0.753907	0.813364	1	1	3286	tags=33%, list=21%, signal=42%
REACTOME_MRNA_DECAY_BY_3_TO_5_EXORIBONUCLEASE	16	-0.329387	-0.748682	0.812646	1	1	3076	tags=13%, list=19%, signal=15%
REACTOME_CLASS_I_PEROXISOMAL_MEMBRANE_PROTEIN_IMPORT	20	-0.297579	-0.746848	0.859813	1	1	3461	tags=25%, list=22%, signal=32%
BIOCARTA_P53HYPOXIA_PATHWAY	21	-0.299998	-0.744791	0.839644	1	1	105	tags=5%, list=1%, signal=5%
REACTOME_N_GLYCAN_ANTENNAE_ELONGATION	15	-0.330179	-0.744022	0.842956	1	1	1802	tags=27%, list=11%, signal=30%
REACTOME_REGULATION_OF_LIPID_METABOLISM_BY_PPARALPHA	107	-0.21653	-0.743548	0.982301	1	1	3673	tags=24%, list=23%, signal=31%
REACTOME_EPIGENETIC_REGULATION_OF_GENE_EXPRESSION	119	-0.209674	-0.732507	0.997222	1	1	3459	tags=18%, list=22%, signal=22%
REACTOME_RHO_GTPASES_ACTIVATE_PAKS	21	-0.288763	-0.730818	0.887665	1	1	1726	tags=19%, list=11%, signal=21%
REACTOME_SIGNALING_BY_FGFR2_IN_DISEASE	36	-0.25631	-0.720619	0.949881	1	1	2326	tags=14%, list=15%, signal=16%
REACTOME_SIGNALING_BY_RETINOIC_ACID	38	-0.250407	-0.718426	0.948655	1	1	1485	tags=13%, list=9%, signal=14%
REACTOME_REGULATION_OF_TP53_ACTIVITY_THROUGH_METHYLATION	19	-0.290922	-0.712203	0.900485	1	1	2224	tags=16%, list=14%, signal=18%
REACTOME_DOWNREGULATION_OF_ERBB2_SIGNALING	28	-0.261242	-0.710959	0.939252	1	1	3555	tags=29%, list=22%, signal=37%
REACTOME_PROCESSING_OF_CAPPED_INTRONLESS_PRE_MRNA	28	-0.264733	-0.710811	0.916667	1	1	3333	tags=18%, list=21%, signal=23%
REACTOME_GLYOXYLATE_METABOLISM_AND_GLYCINE_DEGRADATION	26	-0.271155	-0.709441	0.89755	1	1	3885	tags=23%, list=24%, signal=30%
REACTOME_POSITIVE_EPIGENETIC_REGULATION_OF_RRNA_EXPRESSION	78	-0.219508	-0.709091	0.991573	1	1	3459	tags=18%, list=22%, signal=23%
REACTOME_GRB2_EVENTS_IN_ERBB2_SIGNALING	15	-0.307569	-0.709072	0.87473	1	1	3431	tags=27%, list=22%, signal=34%
REACTOME_NUCLEAR_ENVELOPE_NE_REASSEMBLY	69	-0.224644	-0.708786	0.97861	1	1	2909	tags=14%, list=18%, signal=18%
PID_VEGFR1_PATHWAY	25	-0.27455	-0.70708	0.917275	1	1	3896	tags=44%, list=24%, signal=58%
REACTOME_SIGNALING_BY_FGFR_IN_DISEASE	56	-0.232613	-0.707042	0.97449	1	1	4043	tags=29%, list=25%, signal=38%
BIOCARTA_NGF_PATHWAY	19	-0.286946	-0.706735	0.878855	1	1	3224	tags=26%, list=20%, signal=33%
REACTOME_CARGO_TRAFFICKING_TO_THE_PERICILIARY_MEMBRANE	48	-0.233304	-0.706656	0.954774	1	1	3379	tags=19%, list=21%, signal=24%
BIOCARTA_NUCLEARRS_PATHWAY	22	-0.277725	-0.706257	0.927152	1	1	1892	tags=18%, list=12%, signal=21%
REACTOME_NUCLEAR_RECEPTOR_TRANSCRIPTION_PATHWAY	47	-0.235143	-0.705126	0.966019	1	1	4868	tags=45%, list=31%, signal=64%
REACTOME_A_TETRASACCHARIDE_LINKER_SEQUENCE_IS_REQUIRED_FOR_GAG_SYNTHESIS	26	-0.266911	-0.702451	0.923077	1	1	3872	tags=35%, list=24%, signal=46%
REACTOME_ACTIVATED_PKN1_STIMULATES_TRANSCRIPTION_OF_AR_ANDROGEN_RECEPTOR_REGULATED_GENES_KLK2_AND_KLK3	37	-0.242626	-0.698876	0.974596	1	1	2778	tags=14%, list=17%, signal=16%
REACTOME_ENDOGENOUS_STEROLS	22	-0.282003	-0.698483	0.900943	1	1	3334	tags=32%, list=21%, signal=40%
REACTOME_VEGFR2_MEDIATED_VASCULAR_PERMEABILITY	27	-0.256664	-0.696924	0.945107	1	1	3555	tags=33%, list=22%, signal=43%
REACTOME_RUNX1_REGULATES_GENES_INVOLVED_IN_MEGAKARYOCYTE_DIFFERENTIATION_AND_PLATELET_FUNCTION	67	-0.212418	-0.689527	0.983003	1	1	4254	tags=28%, list=27%, signal=39%
REACTOME_REGULATION_OF_RUNX1_EXPRESSION_AND_ACTIVITY	17	-0.298287	-0.688275	0.893709	1	1	3469	tags=47%, list=22%, signal=60%
REACTOME_PIWI_INTERACTING_RNA_PIRNA_BIOGENESIS	24	-0.265501	-0.686585	0.934461	1	1	4588	tags=38%, list=29%, signal=53%
REACTOME_KSRP_KHSRP_BINDS_AND_DESTABILIZES_MRNA	17	-0.288782	-0.67972	0.912854	1	1	5992	tags=41%, list=38%, signal=66%
REACTOME_GENE_SILENCING_BY_RNA	104	-0.199354	-0.678024	1	1	1	4414	tags=24%, list=28%, signal=33%
REACTOME_RNA_POLYMERASE_III_CHAIN_ELONGATION	18	-0.279237	-0.671023	0.914027	1	1	477	tags=6%, list=3%, signal=6%
KEGG_PARKINSONS_DISEASE	118	-0.194333	-0.670353	1	1	1	3342	tags=19%, list=21%, signal=24%
REACTOME_RNA_POLYMERASE_I_TRANSCRIPTION	83	-0.203714	-0.668685	1	1	1	3459	tags=19%, list=22%, signal=24%
REACTOME_HCMV_EARLY_EVENTS	97	-0.198992	-0.662912	1	1	1	3507	tags=19%, list=22%, signal=24%
REACTOME_SUMOYLATION_OF_TRANSCRIPTION_FACTORS	20	-0.269162	-0.662242	0.926097	1	1	4071	tags=25%, list=26%, signal=34%
REACTOME_BUTYRATE_RESPONSE_FACTOR_1_BRF1_BINDS_AND_DESTABILIZES_MRNA	17	-0.279771	-0.657892	0.928241	1	1	3555	tags=18%, list=22%, signal=23%
REACTOME_PROCESSING_OF_INTRONLESS_PRE_MRNAS	19	-0.27043	-0.654895	0.933045	1	1	3333	tags=21%, list=21%, signal=27%
REACTOME_MITOTIC_PROPHASE	114	-0.187092	-0.651642	1	1	1	4414	tags=20%, list=28%, signal=28%
REACTOME_E2F_MEDIATED_REGULATION_OF_DNA_REPLICATION	22	-0.253991	-0.648007	0.962353	1	1	2058	tags=9%, list=13%, signal=10%
REACTOME_PRC2_METHYLATES_HISTONES_AND_DNA	45	-0.219684	-0.64365	0.981383	1	1	1140	tags=7%, list=7%, signal=7%
REACTOME_COMPLEX_I_BIOGENESIS	55	-0.202754	-0.626442	0.997423	1	1	3342	tags=24%, list=21%, signal=30%
REACTOME_FORMATION_OF_THE_BETA_CATENIN_TCF_TRANSACTIVATING_COMPLEX	63	-0.200982	-0.625475	1	1	1	4427	tags=29%, list=28%, signal=39%
REACTOME_RNA_POLYMERASE_III_TRANSCRIPTION_TERMINATION	23	-0.245468	-0.625049	0.970982	1	1	3553	tags=17%, list=22%, signal=22%
REACTOME_PRE_NOTCH_EXPRESSION_AND_PROCESSING	81	-0.191289	-0.621186	1	1	1	3556	tags=22%, list=22%, signal=28%
REACTOME_DEFECTS_IN_VITAMIN_AND_COFACTOR_METABOLISM	20	-0.247304	-0.616858	0.946667	1	1	1577	tags=10%, list=10%, signal=11%
REACTOME_BBSOME_MEDIATED_CARGO_TARGETING_TO_CILIUM	23	-0.244439	-0.616696	0.968254	1	1	287	tags=4%, list=2%, signal=4%
BIOCARTA_G2_PATHWAY	24	-0.237706	-0.604101	0.983133	1	1	159	tags=4%, list=1%, signal=4%
PID_MYC_PATHWAY	25	-0.23184	-0.599593	0.977215	1	1	2586	tags=16%, list=16%, signal=19%
REACTOME_DNA_METHYLATION	36	-0.212609	-0.596352	0.990074	1	1	871	tags=6%, list=5%, signal=6%
REACTOME_PURINE_CATABOLISM	15	-0.254052	-0.589692	0.962578	1	1	2395	tags=13%, list=15%, signal=16%
REACTOME_TRNA_MODIFICATION_IN_THE_NUCLEUS_AND_CYTOSOL	43	-0.202609	-0.588112	0.997531	1	1	1177	tags=5%, list=7%, signal=5%
REACTOME_SIRT1_NEGATIVELY_REGULATES_RRNA_EXPRESSION	40	-0.19888	-0.582733	0.994723	1	1	3419	tags=15%, list=21%, signal=19%
REACTOME_TRANSCRIPTIONAL_REGULATION_BY_E2F6	34	-0.206255	-0.57834	0.990315	1	1	4931	tags=32%, list=31%, signal=47%
REACTOME_CONDENSATION_OF_PROPHASE_CHROMOSOMES	45	-0.197009	-0.576691	1	1	1	871	tags=4%, list=5%, signal=5%
REACTOME_RNA_POLYMERASE_II_TRANSCRIPTION_TERMINATION	65	-0.174062	-0.553154	1	1	1	3333	tags=14%, list=21%, signal=17%
REACTOME_SUMOYLATION_OF_DNA_REPLICATION_PROTEINS	46	-0.184293	-0.549259	1	1	1	4414	tags=20%, list=28%, signal=27%
REACTOME_REPRODUCTION	95	-0.161595	-0.546771	1	1	1	4145	tags=20%, list=26%, signal=27%
REACTOME_NUCLEOBASE_BIOSYNTHESIS	15	-0.225626	-0.530927	0.978774	1	1	12351	tags=100%, list=77%, signal=443%
BIOCARTA_MCM_PATHWAY	18	-0.216187	-0.528464	0.986985	1	1	12502	tags=100%, list=78%, signal=463%
REACTOME_CELLULAR_HEXOSE_TRANSPORT	17	-0.222931	-0.518518	0.989011	1	1	3839	tags=35%, list=24%, signal=46%
REACTOME_TELOMERE_EXTENSION_BY_TELOMERASE	16	-0.221263	-0.515222	0.989224	1	1	2043	tags=13%, list=13%, signal=14%
REACTOME_INITIATION_OF_NUCLEAR_ENVELOPE_NE_REFORMATION	19	-0.209084	-0.509437	0.993289	1	1	2296	tags=11%, list=14%, signal=12%
PID_FOXM1_PATHWAY	38	-0.168824	-0.482379	1	1	1	3257	tags=13%, list=20%, signal=16%
REACTOME_SUMOYLATION_OF_RNA_BINDING_PROTEINS	47	-0.146085	-0.429717	1	1	1	4414	tags=21%, list=28%, signal=29%
REACTOME_NONHOMOLOGOUS_END_JOINING_NHEJ	52	-0.118119	-0.354808	1	0.999972	1	4071	tags=17%, list=26%, signal=23%
